# Supplementary material
Source: PubMed Central journal article supplement (PMC2525621)
Supplement: NIHMS63822-supplement-1si20060907_11.pdf [file NIHMS63822-supplement-1si20060907_11.pdf]

# Organocatalytic Highly Enantioselective Synthesis of Secondary $\alpha$ -Hydroxyphosphonates

Rajasekhar Dodda and Cong-Gui Zhao\*

*Department of Chemistry, University of Texas at San Antonio, One UTSA Circle,  
San Antonio, TX 78249-0698*

**General procedure for the synthesis of secondary  $\alpha$ -hydroxyphosphonates:** To a stirred solution of the diethyl formylphosphonate hydrate (**4**, 92.0 mg, 0.5 mmol) in the ketone (0.6 mL) was added L-prolinamide (2.9 mg, 0.025 mmol, 5 mol %) at 0 °C. The reaction mixture was stirred at this temperature for 24 h. The solvent was evaporated under vacuum and the residue was purified by flash chromatography (EtOAc) over silica gel to furnish the desired secondary  $\alpha$ -hydroxyphosphonate as a pure compound, which is characterized by its NMR spectroscopic data, such as,  $^1\text{H}$ ,  $^{13}\text{C}$ , COSY and NOE.

## Desulfurization of diethyl [hydroxy-(4-oxo-tetrahydrothiopyran-3-yl)methyl]-phosphonate (**6k**)

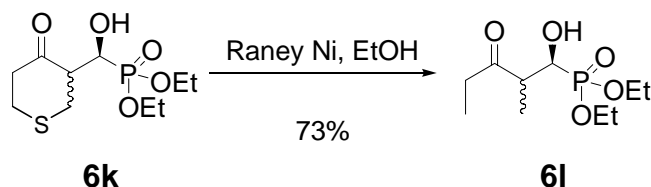

To a solution of compound **6k** (100 mg, 0.35 mmol) in EtOH (10 mL) at room temperature was added activated Raney nickel (0.6 g). The mixture was stirred at room temperature for 30 min and then passed through a Celite pad. The solvent was removed under reduced pressure and the residue was purified by flash column chromatography (EtOAc) to give compound **6l** as a colorless oil (65 mg, 73%).

## Synthesis of diethyl (*S*)-(1-hydroxybutyl)phosphonate (**7**)

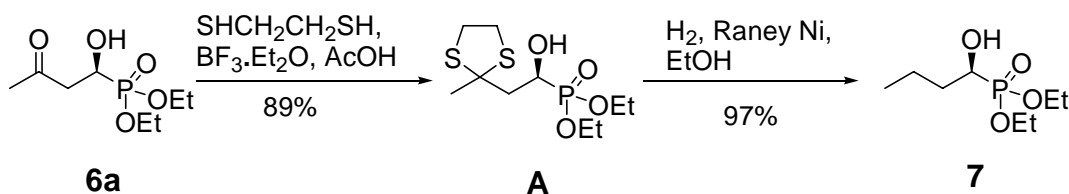

**Diethyl (*S*)-[1-hydroxy-2-(2-methyl-1,3-dithiolan-2-yl)ethyl]phosphonate (A):** To a stirred solution of diethyl (*S*)-(1-hydroxy-3-oxobutyl)phosphonate (224 mg, 1.0 mmol),

1,2-ethanedithiol (376 mg, 4.0 mmol), and acetic acid (2.5 mL) was added BF<sub>3</sub>·Et<sub>2</sub>O (48%, 0.2 mL) at room temperature. The mixture was then stirred at the same temperature for 3 h. After which, acetic acid was removed under high vacuum at 40 °C and the residue was purified by flash column chromatography (EtOAc) over silica gel to give compound **A** (267 mg, 89%) as a colorless oil.

**Diethyl (S)-(1-hydroxybutyl)phosphonate (7)**: To a stirred solution of compound **A** (250 mg, 0.83 mmol) in EtOH (10 mL) was added activated Raney nickel (1.5 g). The mixture was heated at 35 °C under an atmosphere of hydrogen for a period of 6 h. The reaction mixture was then passed through a Celite pad and the solvent was removed under reduced pressure at 40 °C to give compound **7** as a colorless oil (170 mg, 97%). [ $\alpha$ ]<sub>D</sub><sup>20</sup> +20° (c 0.2, MeOH) [Lit.<sup>[17b]</sup> [ $\alpha$ ]<sub>D</sub><sup>20</sup> +24° (c 0.6, MeOH)].

### <sup>1</sup>H and <sup>13</sup>C NMR data of compounds **6a-l**, **7**, and compound **A**.

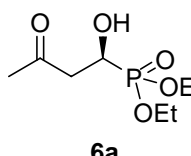 **Diethyl (1-hydroxy-3-oxobutyl)phosphonate (Table 2, entry 1)**: <sup>1</sup>H NMR (500 MHz, CDCl<sub>3</sub>):  $\delta$  = 1.28-1.35 (m, 6H), 2.21 (s, 3H), 2.78-2.93 (m, 2H), 4.13-4.18 (m, 4H), 4.43 (m, 1H); <sup>13</sup>C NMR (125 MHz, CDCl<sub>3</sub>):  $\delta$  = 16.7 (2C, d, *J* = 2.6 Hz), 30.9, 44.8 (d, *J* = 1.9 Hz), 63.2 (2C, d, *J* = 6.8 Hz), 64.0 (d, *J*<sub>cp</sub> = 168.0 Hz), 207.1 (d, *J* = 15.6 Hz).

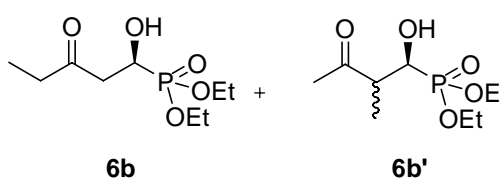 **Diethyl (1-hydroxy-3-oxopentyl)phosphonate and Diethyl (1-hydroxy-2-methyl-3-oxobutyl)phosphonate (Table 2, entry 2)** (Regioisomer mixture): Major regioisomer **6b**: <sup>1</sup>H NMR (500 MHz, CDCl<sub>3</sub>):  $\delta$  = 1.04 (t, *J* = 7.0 Hz, 3H), 1.29-1.34 (m, 6H), 2.48 (q, *J* = 7.5 Hz, 2H), 2.73-2.89 (m, 2H), 4.11-4.15 (m, 4H), 4.45 (m, 1H); <sup>13</sup>C NMR (125 MHz, CDCl<sub>3</sub>):  $\delta$  = 7.7, 16.6 (2C, *J* = 3.3 Hz), 37.0 (d, *J* = 1.5 Hz), 43.6 (d, *J* = 2.9 Hz), 63.3 (2C, *J* = 7.6 Hz), 64.0 (d, *J*<sub>cp</sub> = 168.0 Hz), 209.8 (d, *J* = 15.3 Hz). Minor regioisomer **6b'**: <sup>1</sup>H NMR (500 MHz, CDCl<sub>3</sub>):  $\delta$  = 1.22 (d, *J* = 7.0 Hz, 3H), 1.29-1.34 (m, 6H), 2.22 (s, 3H), 3.03 (m, 1H), 3.98 (m, 1H), 4.11-4.15 (m, 4H); <sup>13</sup>C NMR (125 MHz, CDCl<sub>3</sub>):  $\delta$  = 14.4 (d, *J* = 6.3 Hz), 16.7 (2C, d, *J* = 4.3 Hz), 30.1, 47.2, (d, *J* = 3.9 Hz), 62.9 (2C, d, *J* = 7.1 Hz), 70.5 (d, *J*<sub>cp</sub> = 162.0 Hz), 212.9 (d, *J* = 10.5 Hz).

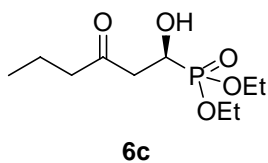

**6c**

**Diethyl (1-hydroxy-3-oxohexyl)phosphonate (Table 2, entry 3):**  $^1\text{H}$  NMR (500 MHz,  $\text{CDCl}_3$ ):  $\delta$  = 0.92 (t,  $J$  = 7.5 Hz, 3H), 1.24-1.37 (m, 6H), 1.58 (m, 2H), 2.45 (m, 2H), 2.86 (m, 2H), 4.16-4.22 (m, 4H), 4.47 (m, 1H);  $^{13}\text{C}$  NMR (125 MHz,  $\text{CDCl}_3$ ):  $\delta$  = 13.9, 16.7 (2C, d,  $J$  = 5.8 Hz), 17.2, 43.7, 45.6 (d,  $J$  = 1.4 Hz), 63.1 (2C, d,  $J$  = 6.8 Hz), 64.2 (d,  $J_{cp}$  = 168.8 Hz), 209.9.

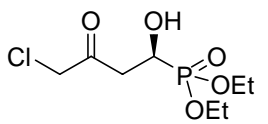

**6d**

**Diethyl (4-chloro-1-hydroxy-3-oxobutyl)phosphonate (Table 2, entry 4):**  $^1\text{H}$  NMR (300 MHz,  $\text{CDCl}_3$ ):  $\delta$  = 1.33-1.39 (m, 6H), 2.90-3.01 (m, 1H), 3.08 (dd,  $J$  = 17.1, 8.1 Hz, 1H), 4.14-4.25 (m, 6H), 4.48 (m, 1H);  $^{13}\text{C}$  NMR (75 MHz,  $\text{CDCl}_3$ ):  $\delta$  = 16.9 (2C, d,  $J$  = 6.0 Hz), 41.7 (d,  $J$  = 2.9 Hz), 49.1 (d,  $J$  = 2.3 Hz), 63.5 (2C, d,  $J$  = 7.2 Hz), 64.2 (d,  $J_{cp}$  = 167.9 Hz), 200.7 (d,  $J$  = 15.8 Hz).

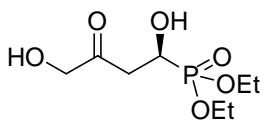

**6e**

**Diethyl (1,4-dihydroxy-3-oxobutyl)phosphonate (Table 2, entry 5):**  $^1\text{H}$  NMR (300 MHz,  $\text{CDCl}_3$ ):  $\delta$  = 1.32-1.40 (m, 6H), 2.70-2.98 (m, 2H), 4.10-4.29 (m, 4H), 4.32 (s, 2H), 4.46 (m, 1H);  $^{13}\text{C}$  NMR (75 MHz,  $\text{CDCl}_3$ ):  $\delta$  = 17.2 (2C, d,  $J$  = 5.4 Hz), 40.7 (d,  $J$  = 2.6 Hz), 63.8 (2C, d,  $J$  = 6.0 Hz), 64.4 (d,  $J_{cp}$  = 167.6 Hz), 69.7, 208.5 (d,  $J$  = 14.9 Hz).

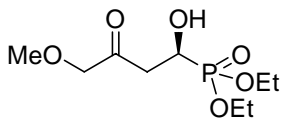

**6f**

**Diethyl (1-hydroxy-4-methoxy-3-oxobutyl)phosphonate (Table 2, entry 6):**  $^1\text{H}$  NMR (500 MHz,  $\text{CDCl}_3$ ):  $\delta$  = 1.32-1.35 (m, 6H), 2.80-2.97 (m, 2H), 3.42 (s, 3H), 4.07 (s, 2H), 4.15-4.17 (m, 4H), 4.48 (m, 1H);  $^{13}\text{C}$  NMR (125 MHz,  $\text{CDCl}_3$ ):  $\delta$  = 16.7 (2C, d,  $J$  = 7.1 Hz), 40.6 (d,  $J$  = 2.5 Hz), 59.6, 63.2 (2C, d,  $J$  = 6.1 Hz), 63.8 (d,  $J_{cp}$  = 168.2 Hz), 78.2 (d,  $J$  = 2.0 Hz), 207.1 (d,  $J$  = 15.3 Hz).

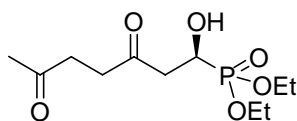

**6g**

**Diethyl (1-hydroxy-3,6-dioxoheptyl)phosphonate (Table 2, entry 7):**  $^1\text{H}$  NMR (500 MHz,  $\text{CDCl}_3$ ):  $\delta$  = 1.33-1.37 (m, 6H), 2.19 (s, 3H), 2.69-2.80 (m, 4H), 2.90-2.94 (m, 2H), 4.16-4.22 (m, 4H), 4.44 (m, 1H);  $^{13}\text{C}$  NMR (125 MHz,  $\text{CDCl}_3$ ):  $\delta$  = 16.9 (2C, d,  $J$  = 5.5 Hz), 30.2, 37.2 (2C, d,  $J$  = 6.8 Hz), 44.2 (d,  $J$  = 2.0 Hz), 63.3 (2C, d,  $J$  = 7.5 Hz), 64.4 (d,  $J_{cp}$  = 168.4 Hz), 207.2, 207.9 (d,  $J$  = 168.5 Hz).

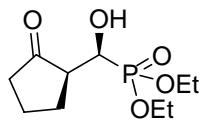

**6h**

**Diethyl [hydroxyl-(2-oxocyclopentyl)methyl]phosphonate (Table 2, entry 8):**  $^1\text{H}$  NMR (500 MHz,  $\text{CDCl}_3$ ):  $\delta$  = 1.30 (t,  $J$  = 7.3 Hz, 6H), 1.73 (m, 1H), 2.03-2.05 (m, 2H), 2.06-2.14 (m, 1H), 2.14-2.22 (m, 1H), 2.23-2.35 (m, 1H), 2.35-2.43 (m, 1H), 4.10-4.15 (m, 4H), 4.50 (dd,  $J$  = 7.0,

2.1 Hz, 1H);  $^{13}\text{C}$  NMR (125 MHz,  $\text{CDCl}_3$ ):  $\delta$  = 16.7 (2C, d,  $J$  = 5.8 Hz), 20.9, 23.4, 38.5 (d,  $J$  = 2.3 Hz), 50.5 (d,  $J$  = 3.3 Hz), 62.8 (d,  $J$  = 7.1 Hz), 63.2 (d,  $J$  = 6.8 Hz), 65.6 (d,  $J_{cp}$  = 167.3 Hz), 219.3 (d,  $J$  = 17.1 Hz).

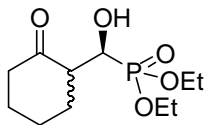

**6i**

**Diethyl [hydroxy-(2-oxocyclohexyl)methyl]phosphonate (Table 2, entry 10):**  $^1\text{H}$  NMR (500 MHz,  $\text{CDCl}_3$ , diastereomer mixture):  $\delta$  = 1.33-1.37 (m, 6H), 1.67-1.77 (m, 2H), 1.82-1.95 (m, 2H), 2.10 (m, 1H), 2.31-2.47 (m, 3H), 2.82 (anti) and 2.90 (syn) (m, 1H), 4.04 (syn) and 4.64 (anti) (m, 1H), 4.13-4.20 (m, 4H);  $^{13}\text{C}$  NMR (125 MHz,  $\text{CDCl}_3$ ):  $\delta$  = 16.8 (2C, d,  $J$  = 5.3 Hz), 20.3 (anti) and 21.2 (syn), 29.7 (anti) and 28.3 (syn), 31.9 (anti) and 30.6 (syn), 47.0 (anti) and 47.7 (syn), 52.2 (d,  $J$  = 2.9 Hz), 62.9 (syn) (2C, d,  $J$  = 7.1 Hz) and 63.2 (anti) (2C, d,  $J$  = 7.1 Hz), 65.4 (anti) (d,  $J_{cp}$  = 166.9 Hz) and 66.6 (syn) (d,  $J_{cp}$  = 165.9 Hz), 218.7 (anti)(d,  $J$  = 17.3 Hz) and 219.9 (syn)(d,  $J$  = 17.1 Hz).

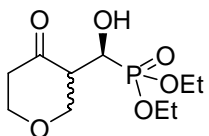

**6j**

**Diethyl [hydroxy-(4-oxo-tetrahydropyran-3-yl)methyl]phosphonate (Table 2, entry 11):**  $^1\text{H}$  NMR (500 MHz,  $\text{CDCl}_3$ , diastereomer mixture):  $\delta$  = 1.32-1.36 (m, 6H), 2.46-2.51 (m, 1H), 2.61-2.70 (m, 1H), 2.96 (anti) and 3.08 (syn) (m, 1H), 3.44 (anti) and 3.78 (syn) (bs, 1H, -OH), 3.75-3.95 (m, 2H), 4.10-4.72 (m, 7H);  $^{13}\text{C}$  NMR (75 MHz,  $\text{CDCl}_3$ ):  $\delta$  = 16.9 (2C, d,  $J$  = 5.4), 42.9 (anti) and 43.1 (syn), 52.6 (anti) (d,  $J$  = 4.9 Hz) and 54.0 (syn) (d,  $J$  = 3.5 Hz), 63.2 (anti) (2C, d,  $J$  = 7.4 Hz) and 63.5 (syn) (2C, d,  $J$  = 6.8 Hz), 64.0 (anti) (d,  $J_{cp}$  = 169.0 Hz) and 65.9 (syn) (d,  $J_{cp}$  = 163.9 Hz), 68.6 (anti) (d,  $J$  = 2.9 Hz) and 70.5 (syn) (d,  $J$  = 5.32 Hz), 76.9, 206.2 (anti) (d,  $J$  = 13.7 Hz) and 208.0 (syn) (d,  $J$  = 13.3 Hz).

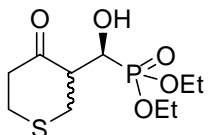

**6k**

**Diethyl [hydroxy-(4-oxo-tetrahydrothiopyran-3-yl)methyl]phosphonate (Table 2, entry 12):**  $^1\text{H}$  NMR (500 MHz,  $\text{CDCl}_3$ ):  $\delta$  = 1.30-1.35 (m, 6H), 2.68-2.82 (m, 2H), 2.89-3.30 (m, 5H), 3.71 (anti) and 3.90 (syn) (m, 1H, -OH), 4.13-4.17 (m, 4H), 4.68 (anti) and 4.37 (syn) (m, 1H);  $^{13}\text{C}$  NMR (125 MHz,  $\text{CDCl}_3$ ):  $\delta$  = 16.7, (2C, d,  $J$  = 5.7 Hz), 30.8, 31.2 (anti) (t,  $J$  = 9.8 Hz), 33.7 (d,  $J$  = 5.3 Hz), 44.5 (t,  $J$  = 8.6 Hz), 54.3 (anti) (d,  $J$  = 4.8 Hz) and 54.8 (syn) (d,  $J$  = 3.9 Hz), 63.2 (anti) (d,  $J$  = 7.1 Hz) and 63.4 (syn) (2C, d,  $J$  = 7.3 Hz), 65.5 (anti) (d,  $J_{cp}$  = 167.9 Hz) and 68.0 (syn) (d,  $J_{cp}$  = 162.1 Hz), 208.9 (anti) (d,  $J$  = 12.4 Hz) and 210.2 (syn) (d,  $J$  = 11.4 Hz).

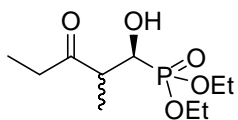

**6l**

**Diethyl (1-hydroxy-2-methyl-3-oxopentyl)phosphonate (6l, Scheme 2):**  $^1\text{H}$  NMR (500 MHz,  $\text{CDCl}_3$ ):  $\delta$  = 1.00-1.06 (m, 3H), 1.16-1.35 (m, 9H), 2.49-2.60 (m, 2H), 2.96-3.06 (m, 1H), 4.30 (anti) and 3.97 (syn) (m, 1H), 4.11-4.17 (m, 4H);  $^{13}\text{C}$  NMR (125 MHz,

CDCl<sub>3</sub>):  $\delta$  = 7.7 (anti) and 7.5 (syn), 12.5 (syn) and 15.0 (anti) (d,  $J$  = 8.1 Hz), 16.6 (2C, d,  $J$  = 5.3 Hz), 36.5 (anti) and 34.9 (syn). 46.9 (anti) and 45.6 (syn), 62.8 (syn) (2C, d,  $J$  = 7.5 Hz) and 63.2 (syn) (2C, d,  $J$  = 6.3 Hz), 68.1 (d,  $J$  = 164.1 Hz), 71.0 (d,  $J_{cp}$  = 161.1), 213.9 (anti) (d,  $J$  = 10.5 Hz) and 216.0 (syn) (d,  $J$  = 8.5 Hz)

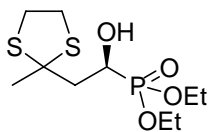

**Diethyl [1-hydroxy-2-(2-methyl-1,3-dithiolan-2-yl)ethyl]phosphonate (A):** <sup>1</sup>H NMR (500 MHz, CDCl<sub>3</sub>):  $\delta$  = 1.34 (t,  $J$  = 6.8 Hz, 6H),

1.84 (s, 3H), 2.32-2.42 (m, 2H), 3.33-3.39 (m, 4H), 4.15-4.22 (m, 4H), 4.36 (t,  $J$  = 9.5 Hz, 1H); <sup>13</sup>C NMR (125 MHz, CDCl<sub>3</sub>):  $\delta$  = 16.7 (2C, d,  $J$  = 2.9 Hz), 33.5, 40.1, 40.4, 45.2 (d,  $J$  = 1.9 Hz), 62.9 (d,  $J$  = 6.8 Hz), 63.1 (d,  $J$  = 6.6 Hz), 65.9 (d,  $J$  = 19.5 Hz), 67.3 (d,  $J_{cp}$  = 166.0 Hz).

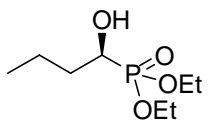

**7**

**Diethyl (1-hydroxy-3-oxobutyl)phosphonate (7):** <sup>1</sup>H NMR (500 MHz, CDCl<sub>3</sub>):  $\delta$  = 0.95 (t,  $J$  = 7.3 Hz, 3H), 1.34 (t,  $J$  = 7.0 Hz, 6H), 1.45 (m,

1H), 1.64-1.74 (m, 3H), 3.87 (m, 1H), 4.14-4.20 (m, 4H); <sup>13</sup>C NMR (125 MHz, CDCl<sub>3</sub>):  $\delta$  = 13.9, 16.8 (2C, d,  $J$  = 5.8 Hz), 19.2 (d,  $J$  = 13.3 Hz), 33.5, 62.8 (2C, d,  $J$  = 7.1 Hz), 67.9 (d,  $J_{cp}$  = 158.8 Hz).

V-DR-77-1H

Archive directory: /home/drajasek/vnmrsys/data  
Sample directory:

Pulse Sequence: s2pu1

Solvent: CDCl3  
Ambient temperature  
File: V-DR-acetonephosphate  
INOVA-500 "Inova500"

Relax. delay 1.000 sec  
Pulse 45.0 degrees  
Acq. time 1.892 sec  
Width 7995.2 Hz  
8 repetitions  
OBSERVE H1, 499.6931887 MHz  
DATA PROCESSING  
FT size 32768  
Total time 0 min, 23 sec

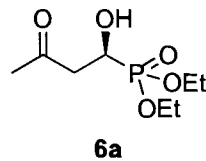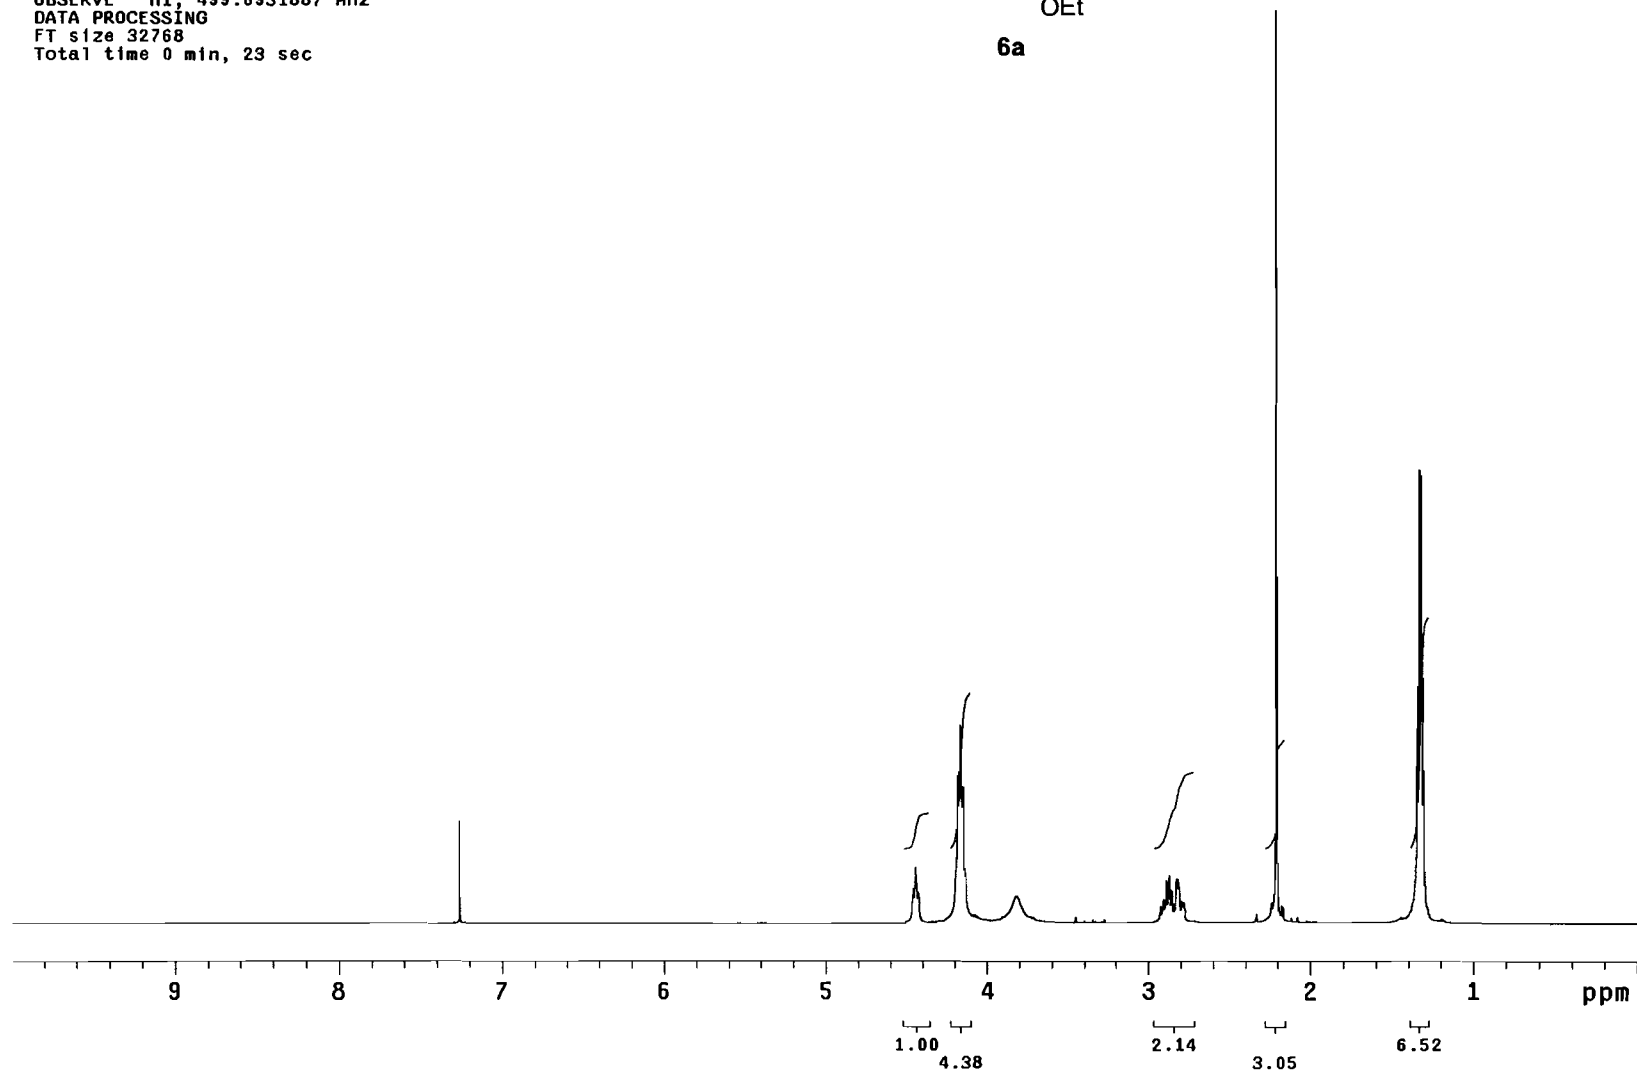

S-6

V-DR-77-13C

Archive directory: /home/dra.jasek/vnmrSYS/data  
Sample directory:

Pulse Sequence: s2pu1

Solvent: CDCl3  
Ambient temperature  
User: 1-14-87  
File: V-DR-acetone-13C  
INOVA-500 "Inova500"

Relax. delay 1.000 sec  
Pulse 45.0 degrees  
Acq. time 1.300 sec  
Width 31409.5 Hz  
15000 repetitions  
OBSERVE C13, 125.6479222 MHz  
DECOUPLE H1, 499.6956872 MHz  
Power 36 dB  
continuously on  
WALTZ-16 modulated  
DATA PROCESSING  
Line broadening 0.5 Hz  
FT size 131072  
Total time 9 hr, 37 min, 20 sec

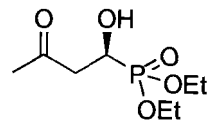

6a

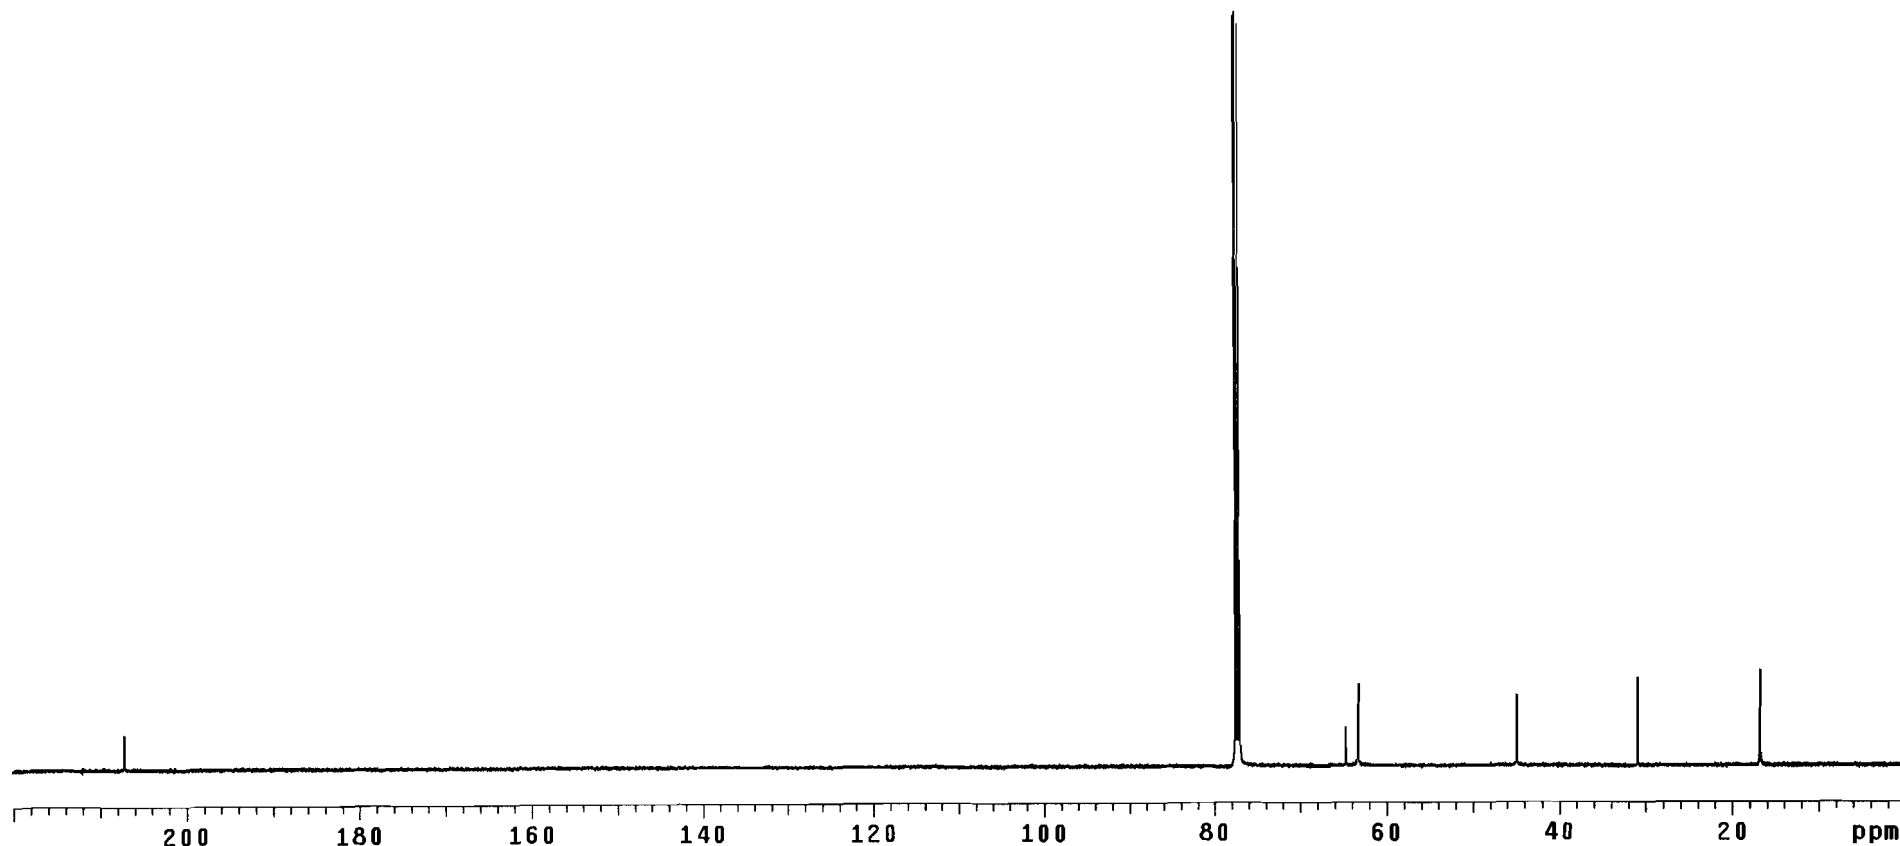

V-DR-134-1H

Archive directory: /home/drajasek/vnmrsys/data  
Sample directory:

Pulse Sequence: s2pu1

Solvent: CDC13  
Ambient temperature  
File: V-DR-Butanone  
INOVA-500 "Inova500"

Relax. delay 1.000 sec  
Pulse 45.0 degrees  
Acq. time 1.892 sec  
Width 7995.2 Hz  
8 repetitions  
OBSERVE H1, 499.6931887 MHz  
DATA PROCESSING  
FT size 32768  
Total time 0 min, 23 sec

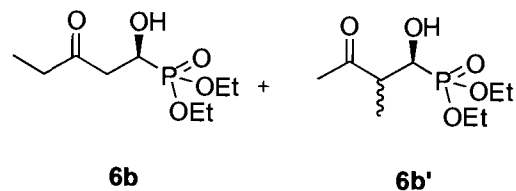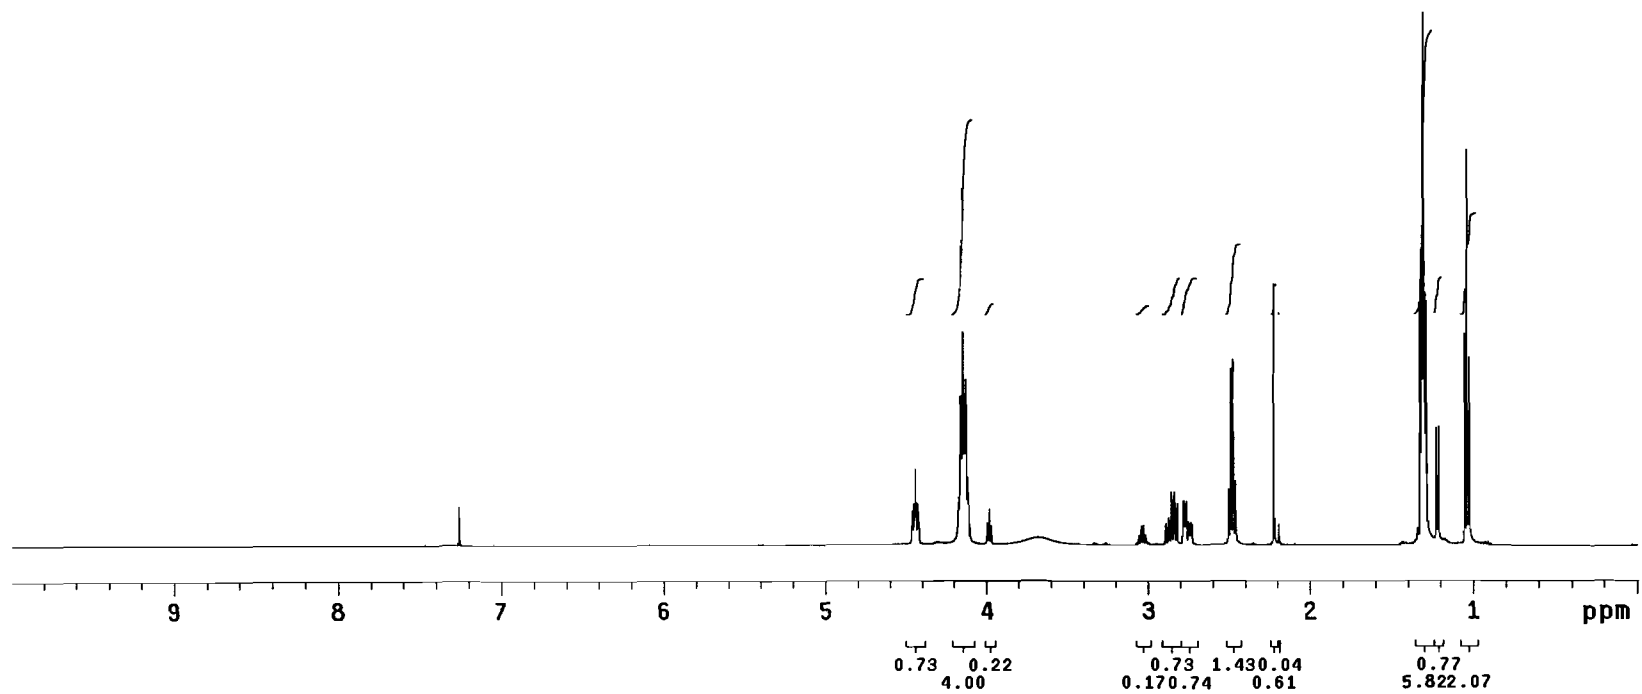

S-8



V-DR-134-13C

Archive directory: /home/drajasek/vnmrsys/data  
Sample directory:

Pulse Sequence: s2pu1

Solvent: CDC13  
Ambient temperature  
User: 1-14-87  
File: V-DR-64-13C  
INOVA-500 "Inova500"

Relax. delay 1.000 sec  
Pulse 45.0 degrees  
Acq. time 1.300 sec  
Width 31409.5 Hz  
4864 repetitions  
OBSERVE C13, 125.6479222 MHz  
DECOUPLE H1, 499.6956872 MHz  
Power 36 dB  
continuously on  
WALTZ-16 modulated  
DATA PROCESSING  
Line broadening 0.5 Hz  
FT size 131072  
Total time 6 hr, 24 min, 53 sec

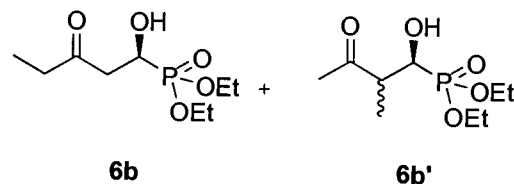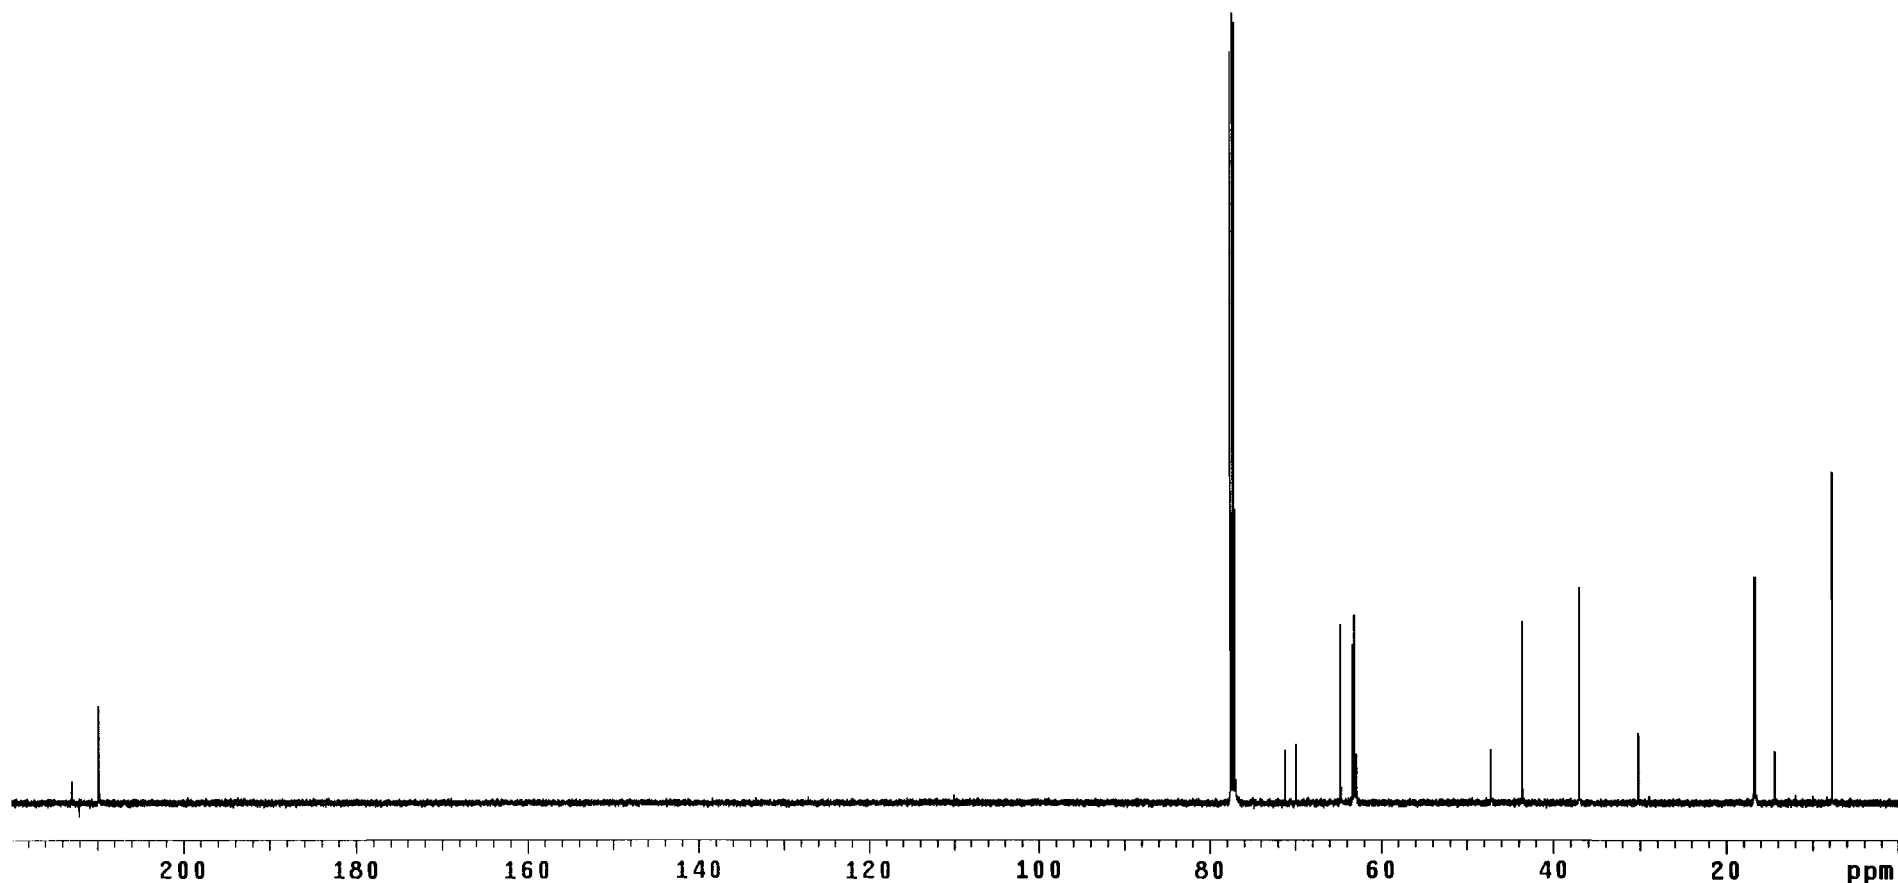

V-DR-141-1H

Archive directory: /home/drajasek/vnmrsys/data  
Sample directory:

Pulse Sequence: s2pul

Solvent: CDCl3  
Ambient temperature  
File: IV-DR-141-1Ha  
INOVA-500 "Inova500"

Relax. delay 1.000 sec  
Pulse 45.0 degrees  
Acq. time 1.892 sec  
Width 7995.2 Hz  
8 repetitions  
OBSERVE H1, 499.6931887 MHz  
DATA PROCESSING  
FT size 32768  
Total time 0 min, 23 sec

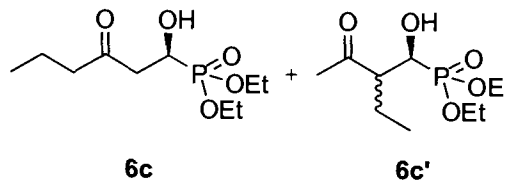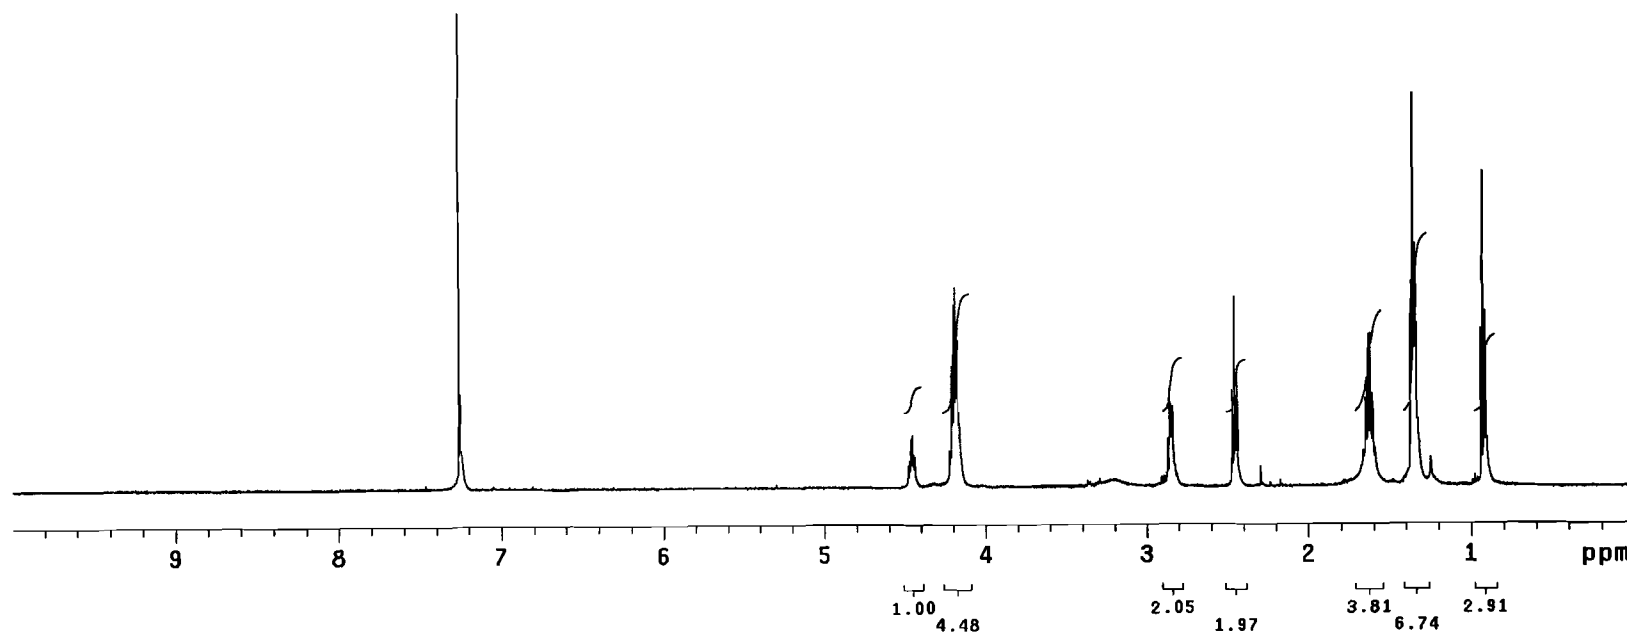

S-10

V-DR-141-13C

Archive directory: /home/drajasek/vnmrsys/data  
Sample directory:

Pulse Sequence: s2pu1

Solvent: CDC13  
Ambient temperature  
User: 1-14-87  
File: IV-DR-141-13C  
INOVA-500 "Inova500"

Relax. delay 1.000 sec  
Pulse 45.0 degrees  
Acq. time 1.300 sec  
Width 31409.5 Hz  
5000 repetitions  
OBSERVE C13, 125.6479222 MHz  
DECOUPLE H1, 499.6956872 MHz  
Power 36 dB  
continuously on  
WALTZ-16 modulated  
DATA PROCESSING  
Line broadening 0.5 Hz  
FT size 131072  
Total time 3 hr, 12 min, 26 sec

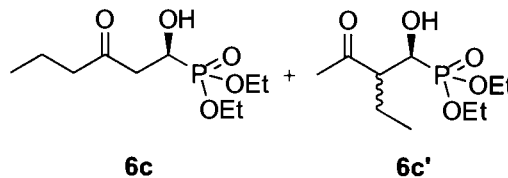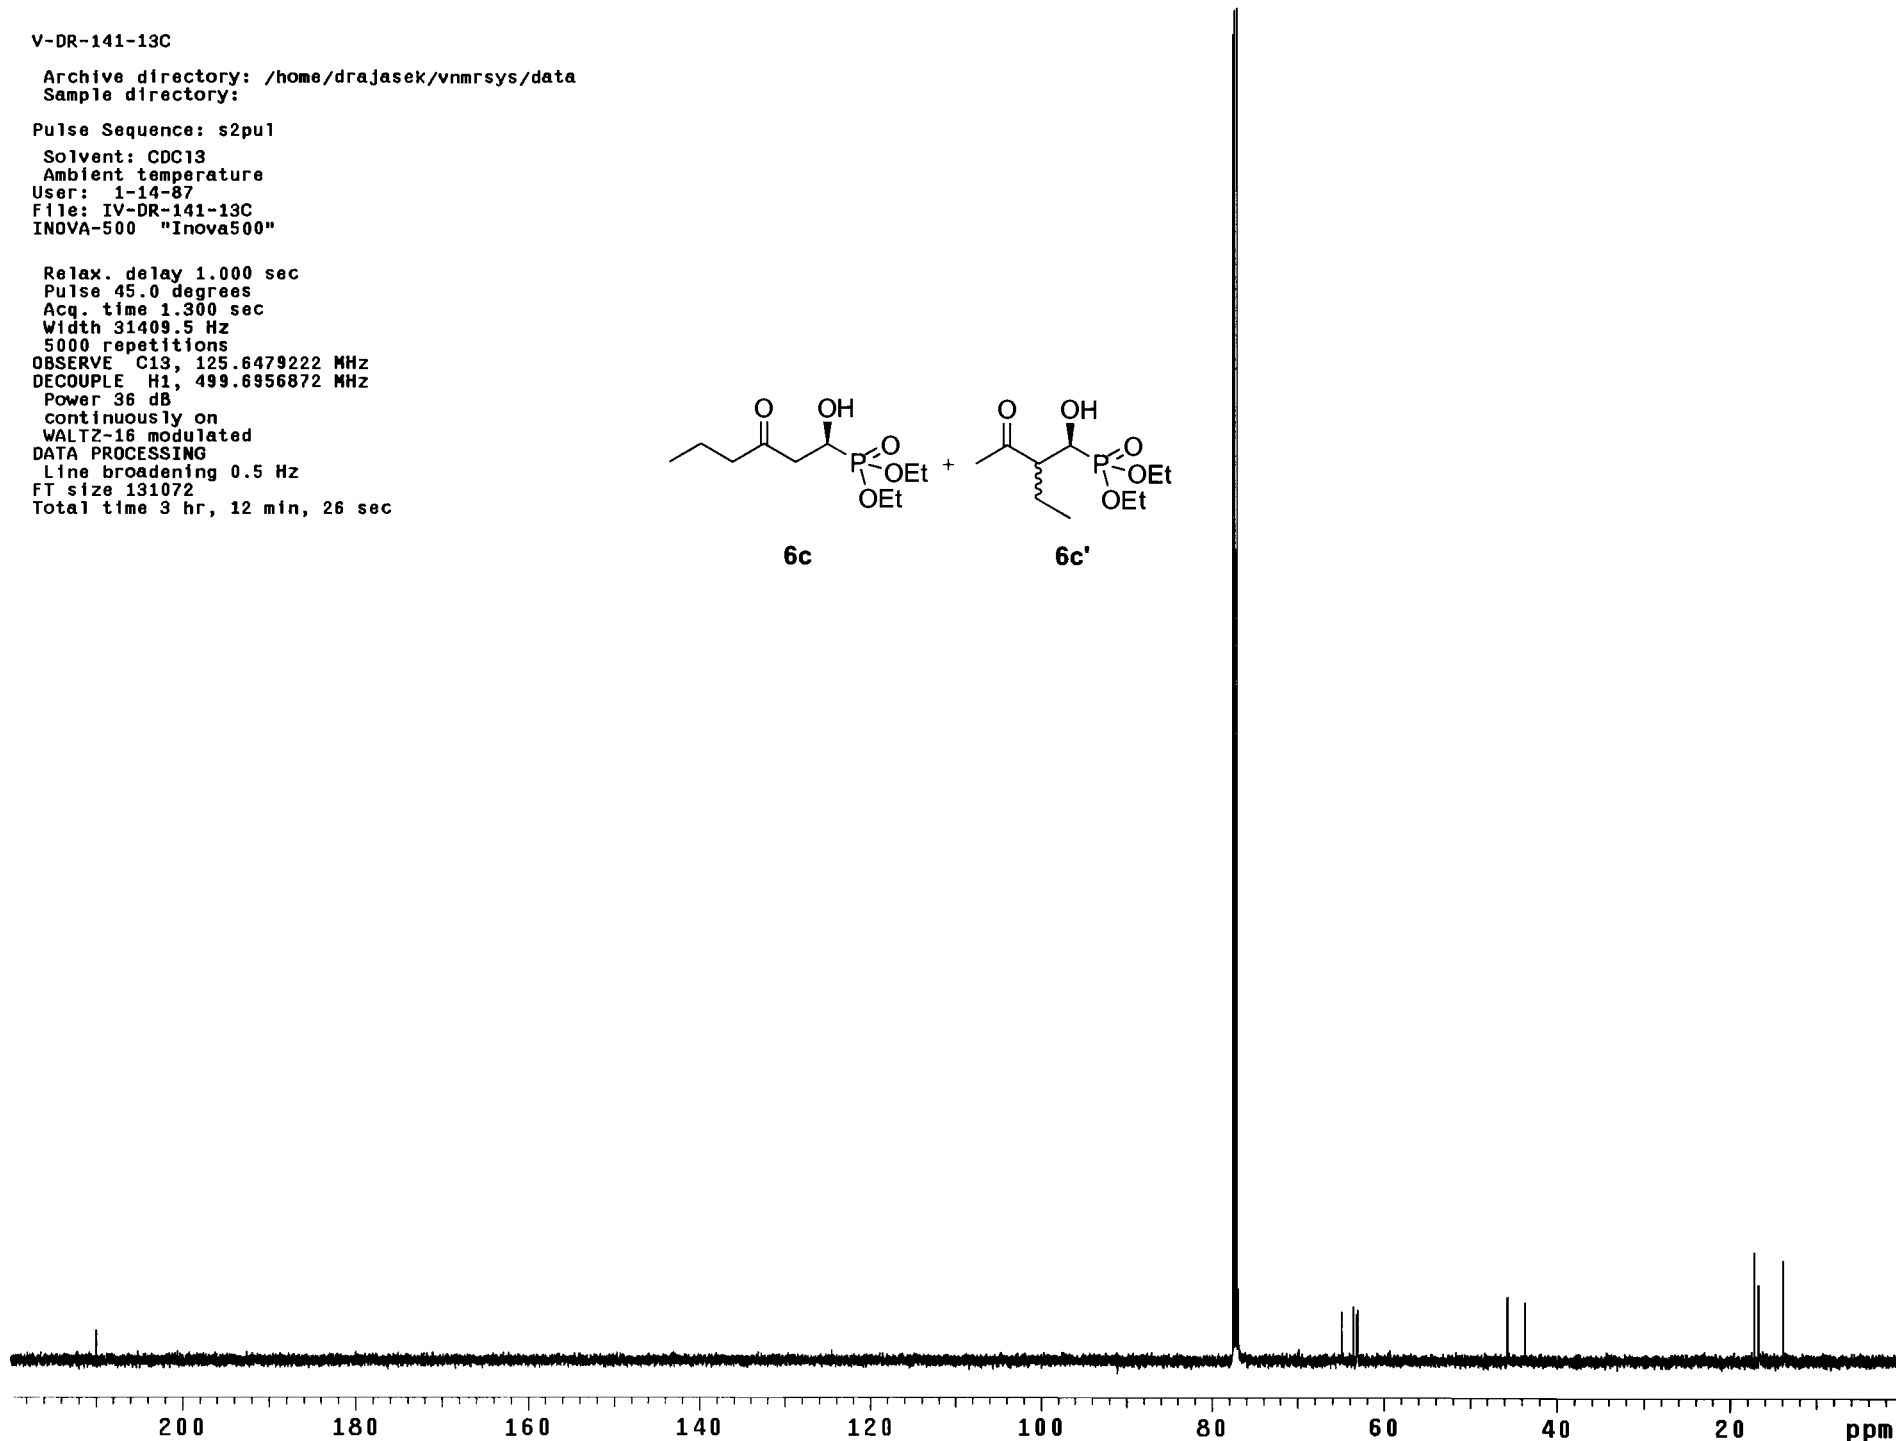

V-DR-74-1H

Archive directory: /home/drajasek/vnmrsys/data  
Sample directory:

Pulse Sequence: s2pul

Solvent: CDC13

Ambient temperature

File: V-DR-74-1H

Mercury-300BB "Varian300"

Relax. delay 1.000 sec  
Pulse 45.0 degrees  
Acq. time 2.001 sec  
Width 4789.3 Hz  
16 repetitions  
OBSERVE H1, 299.7452618 MHz  
DATA PROCESSING  
FT size 32768  
Total time 0 min, 49 sec

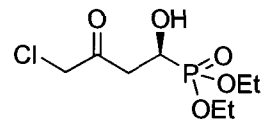

6d

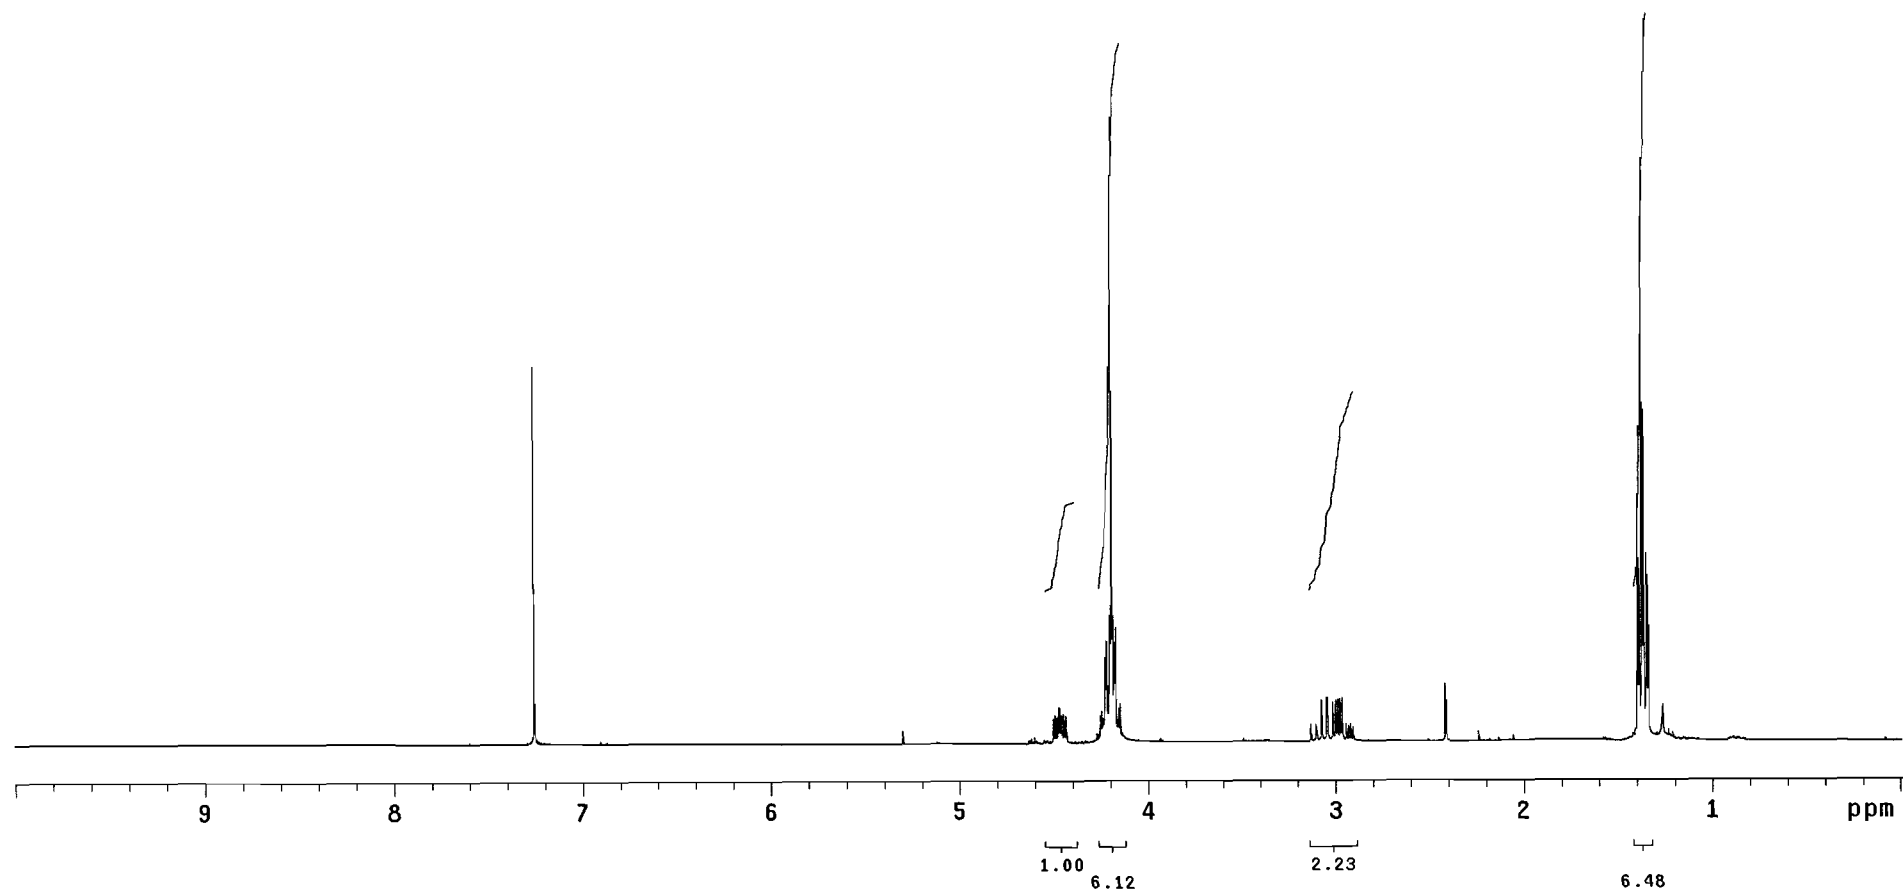

V-DR-74-13C

Archive directory: /home/drajasek/vnmrsys/data  
Sample directory:  
File: CARBON

Pulse Sequence: s2pu1

Solvent: CDC13  
Ambient temperature  
Mercury-300BB "Varian300"

Relax. delay 1.000 sec  
Pulse 45.0 degrees  
Acq. time 1.815 sec  
Width 18832.4 Hz  
15000 repetitions  
OBSERVE C13, 75.3709880 MHz  
DECOUPLE H1, 299.7467965 MHz  
Power 33 dB  
continuously on  
WALTZ-16 modulated  
DATA PROCESSING  
Line broadening 1.0 Hz  
FT size 131072  
Total time 12 hr, 8 min, 37 sec

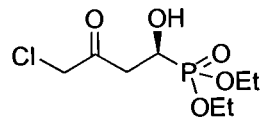

6d

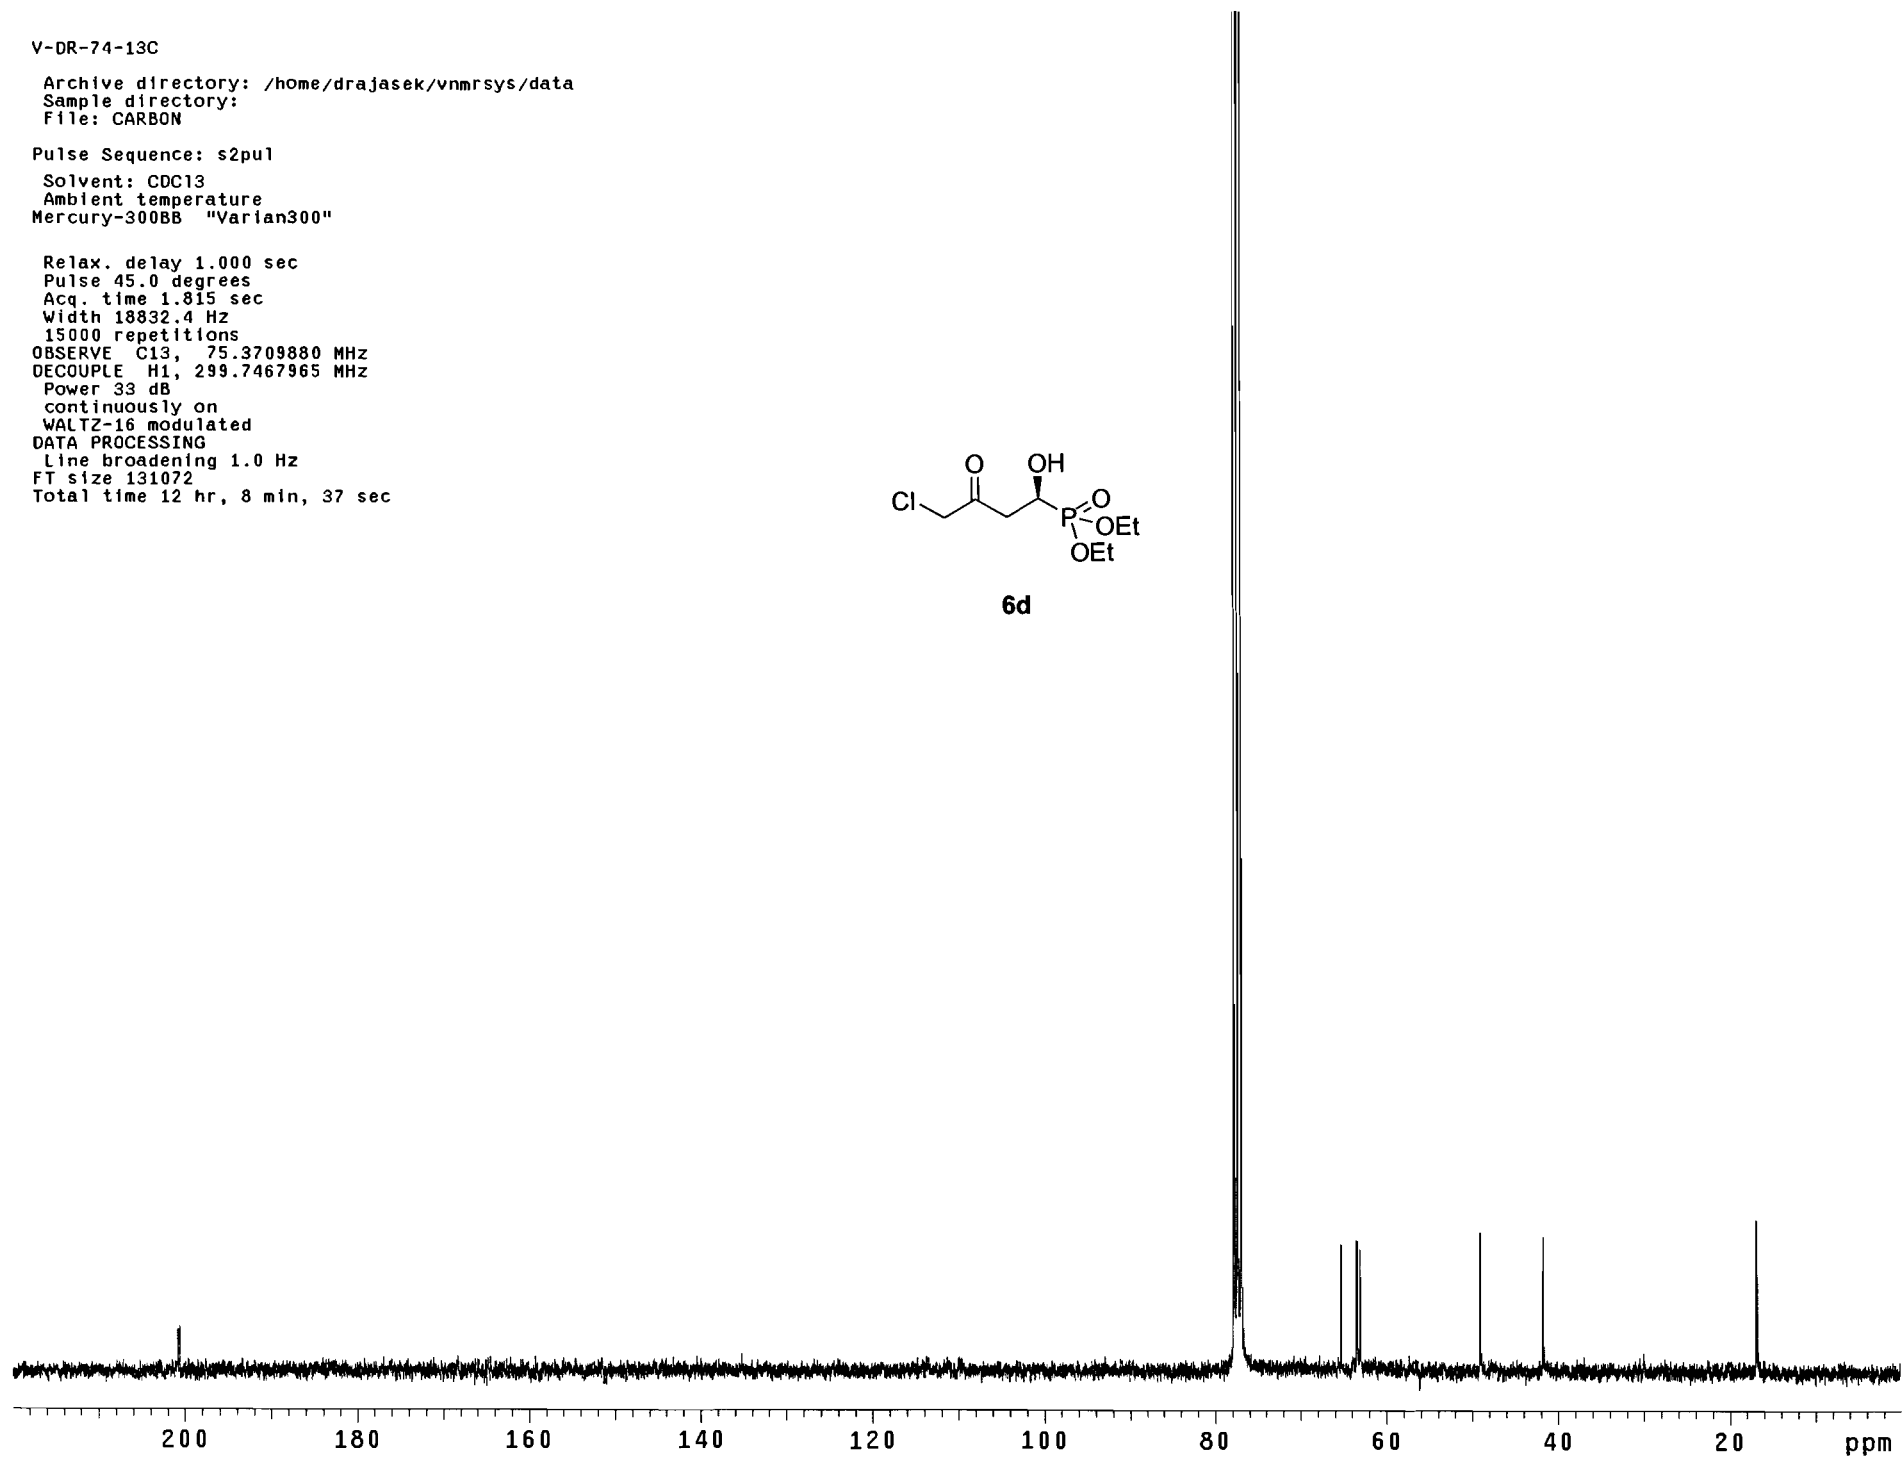

V-DR-59-1H

Archive directory: /home/drajasek/vnmrsys/data  
Sample directory:

Pulse Sequence: s2pu1

Solvent: CDC13  
Ambient temperature  
File: V-DR-56-1H  
Mercury-300BB "Varian300"

Relax. delay 1.000 sec  
Pulse 45.0 degrees  
Acq. time 2.001 sec  
Width 4789.3 Hz  
16 repetitions  
OBSERVE H1, 299.7452618 MHz  
DATA PROCESSING  
FT size 32768  
Total time 0 min, 49 sec

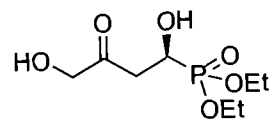

6e

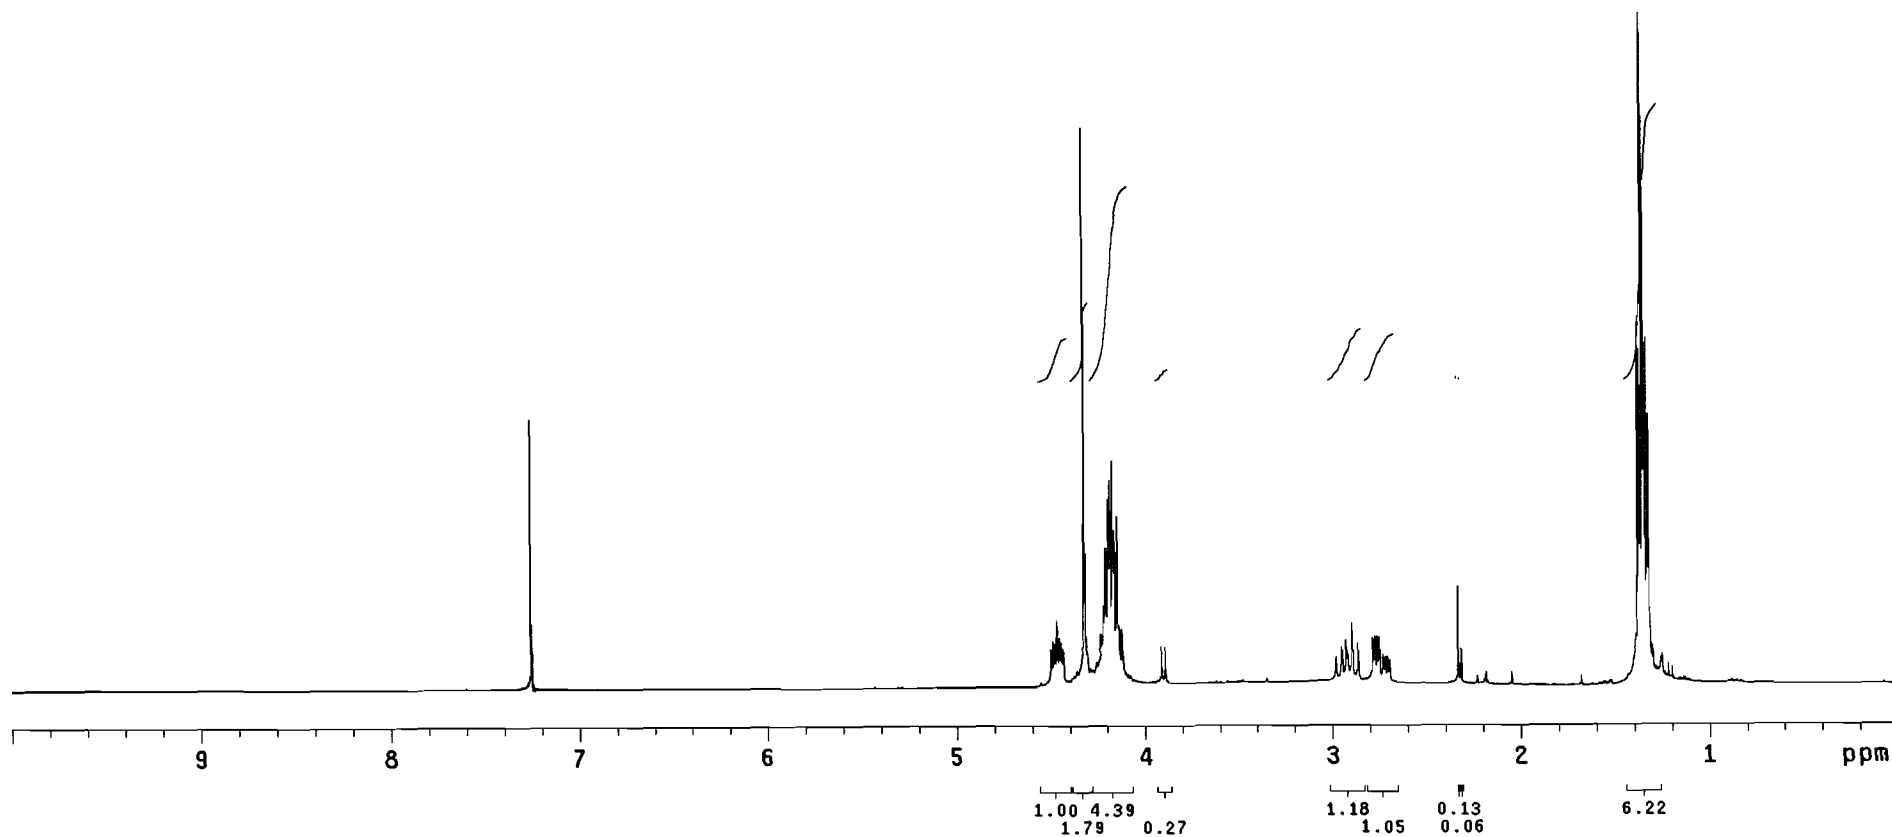

V-DR-59-13C

Archive directory: /home/drajasek/vnmrsys/data  
Sample directory:

Pulse Sequence: s2pu1

Solvent: CDCl3  
Ambient temperature  
File: V-DR-56-13C  
Mercury-300BB "Varian300"

Relax. delay 1.000 sec  
Pulse 45.0 degrees  
Acq. time 1.815 sec  
Width 18832.4 Hz  
17000 repetitions  
OBSERVE C13, 75.3709880 MHz  
DECOUPLE H1, 299.7467965 MHz  
Power 33 dB  
continuously on  
WALTZ-16 modulated  
DATA PROCESSING  
Line broadening 1.0 Hz  
FT size 131072  
Total time 13 hr, 45 min, 41 sec

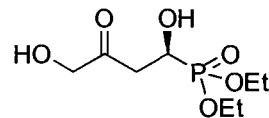

6e

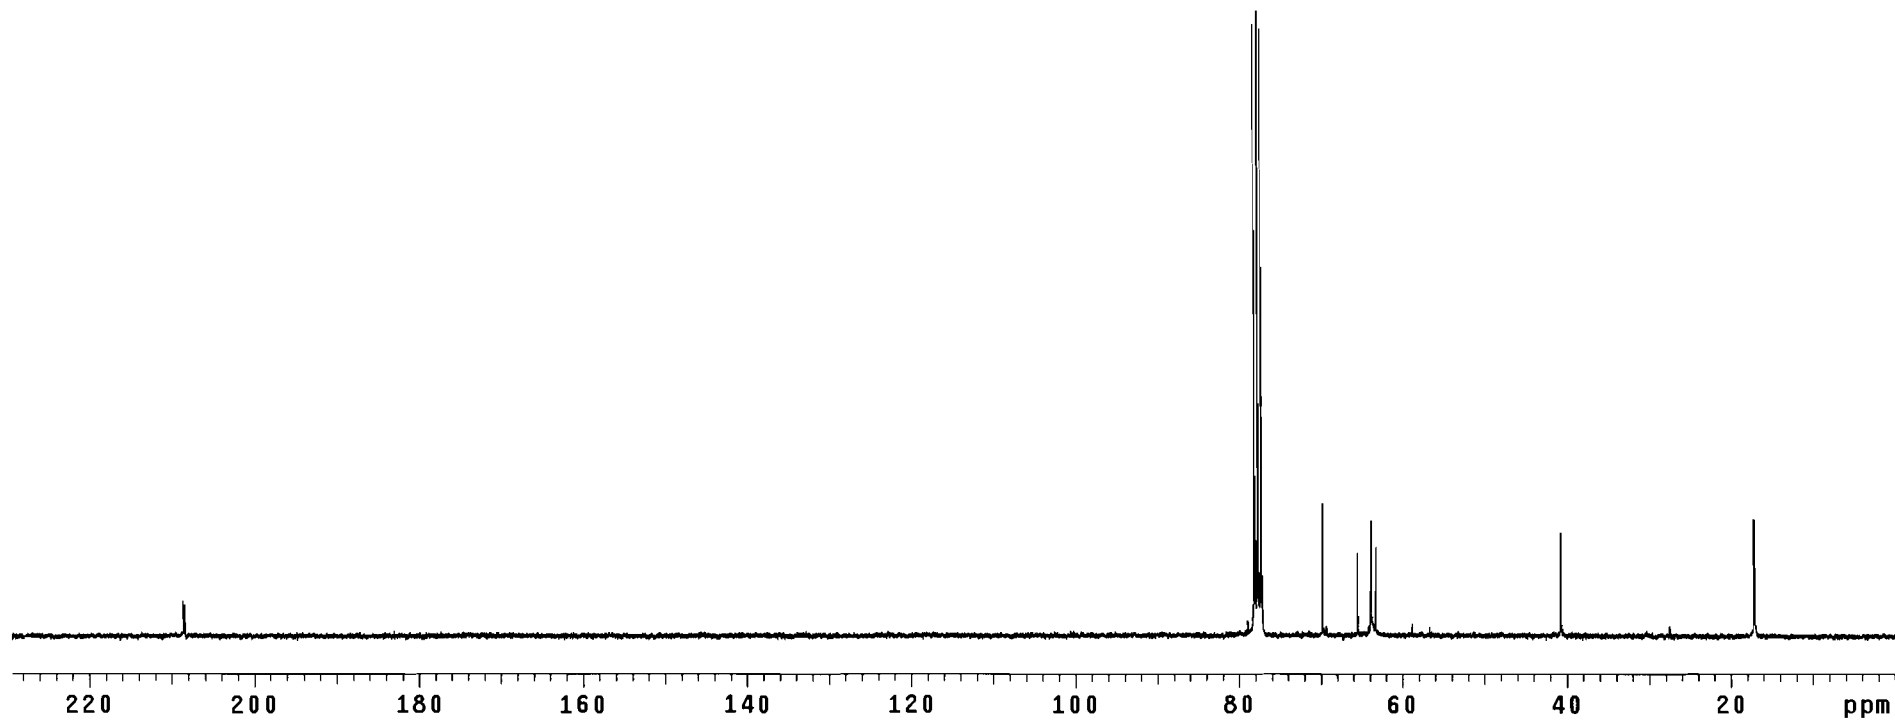

V-DR-62-1H

Archive directory: /home/drajasek/vnmrsys/data  
Sample directory:

Pulse Sequence: s2pu1

Solvent: COCl3  
Ambient temperature  
File: V-DR-62-1H  
INOVA-500 "Inova500"

Relax. delay 1.000 sec  
Pulse 45.0 degrees  
Acq. time 1.892 sec  
Width 7995.2 Hz  
16 repetitions  
OBSERVE H1, 499.6931887 MHz  
DATA PROCESSING  
FT size 32768  
Total time 0 min, 46 sec

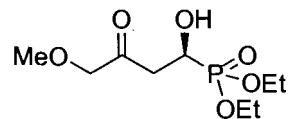

6f

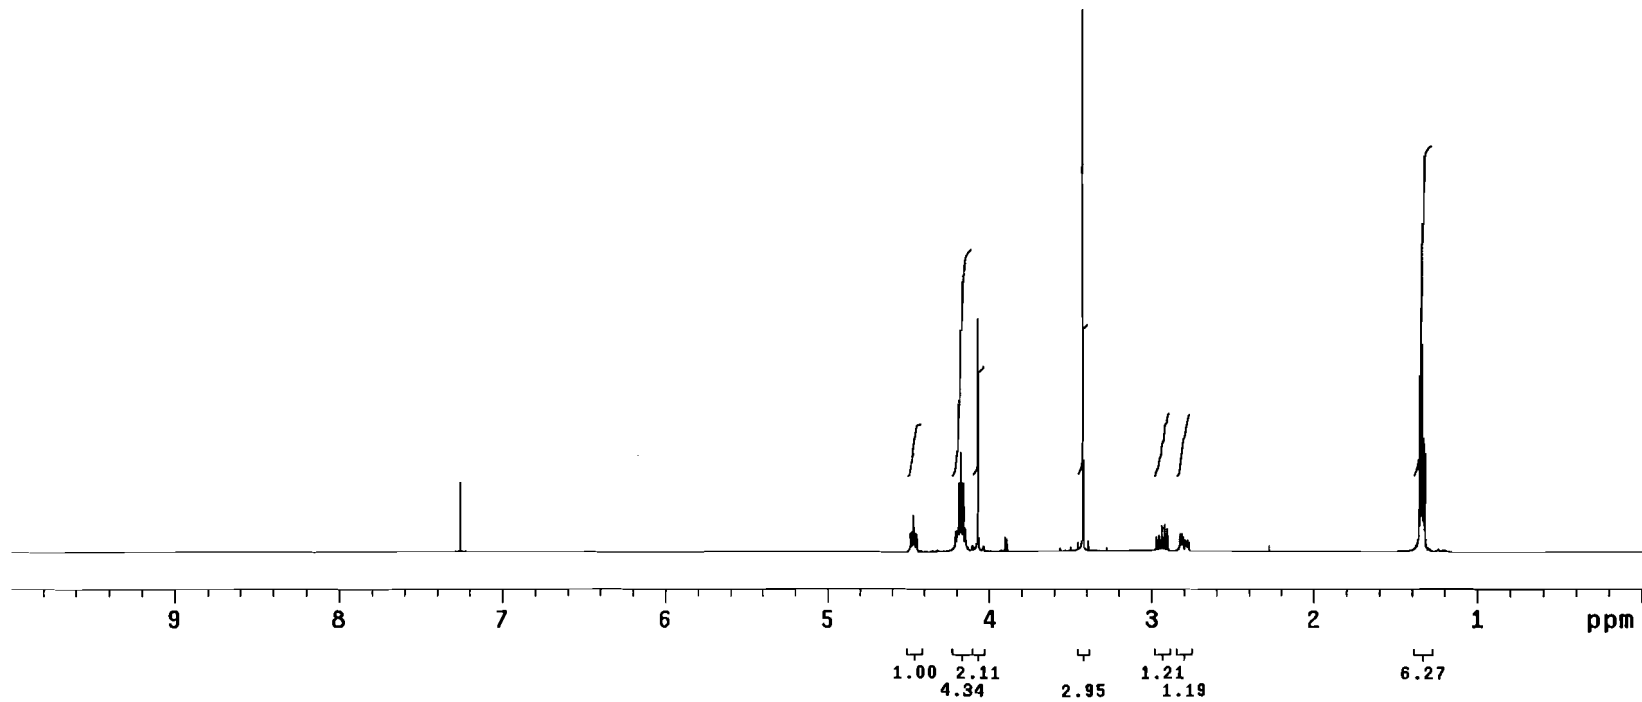



V-DR-62-13C

Archive directory: /home/drajasek/vnmrsys/data  
Sample directory:

Pulse Sequence: s2pu1

Solvent: CDCl3  
Ambient temperature  
User: 1-14-87  
File: V-DR-62-13C  
INOVA-500 "Inova500"

Relax. delay 1.000 sec  
Pulse 45.0 degrees  
Acq. time 1.300 sec  
Width 31409.5 Hz  
16000 repetitions  
OBSERVE C13, 125.6479222 MHz  
DECOUPLE H1, 499.6956872 MHz  
Power 36 dB  
continuously on  
WALTZ-16 modulated  
DATA PROCESSING  
Line broadening 0.5 Hz  
FT size 131072  
Total time 10 hr, 15 min, 49 sec

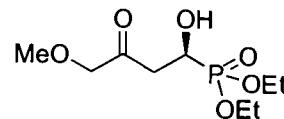

6f

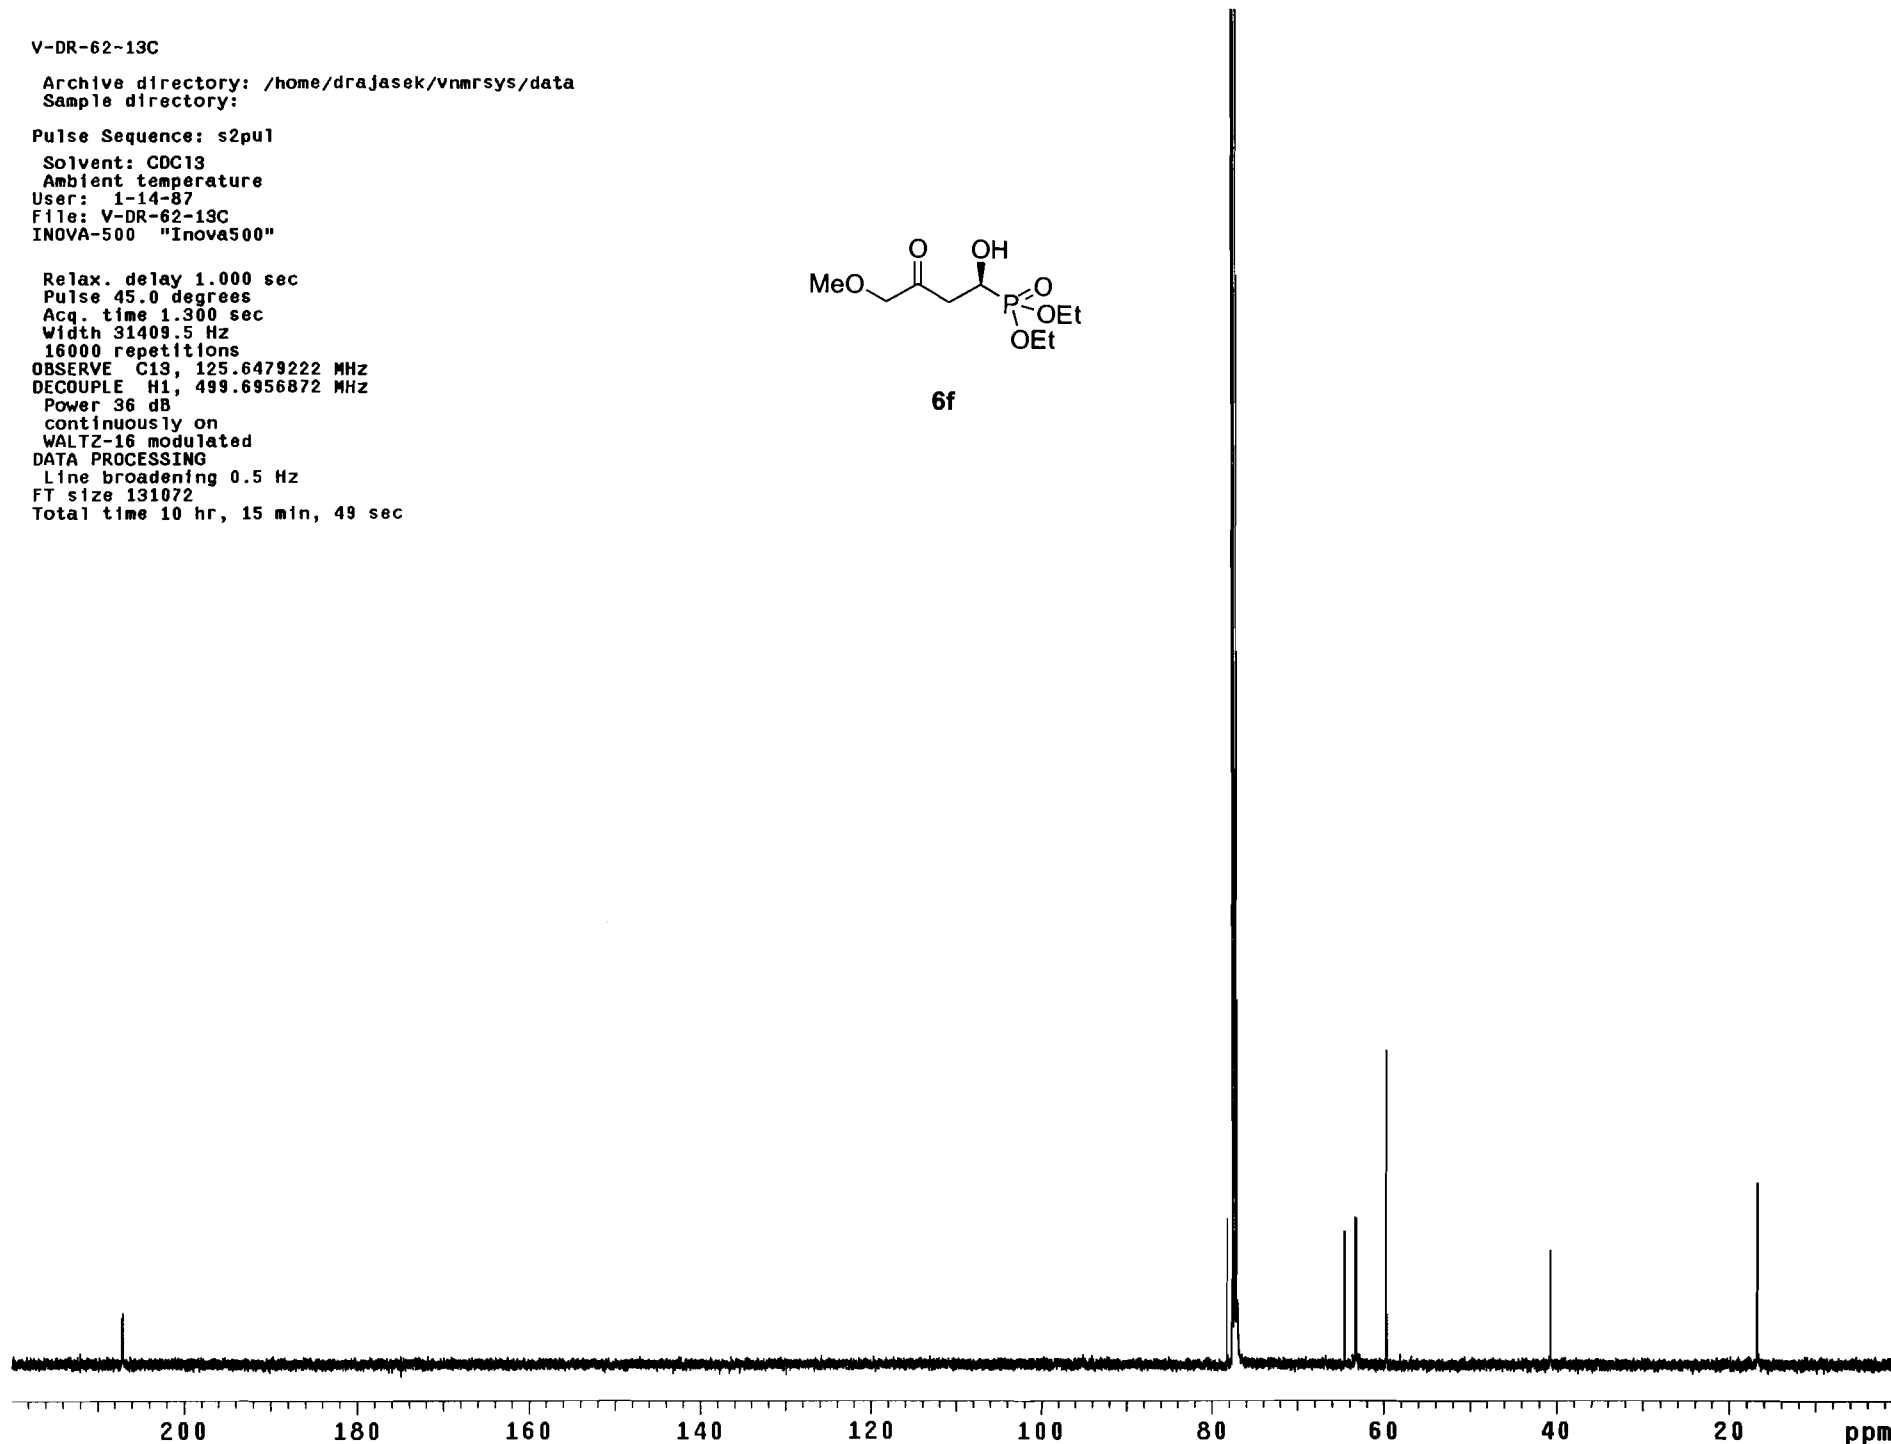

V-DR-31-1H

Archive directory: /home/drajasek/vnmrsys/data  
Sample directory:

Pulse Sequence: s2pu1

Solvent: CDCl3  
Ambient temperature  
File: V-DR-28-1H  
INOVA-500 "Inova500"

Relax. delay 1.000 sec  
Pulse 45.0 degrees  
Acq. time 1.892 sec  
Width 7995.2 Hz  
128 repetitions  
OBSERVE H1, 499.6931887 MHz  
DATA PROCESSING  
FT size 32768  
Total time 6 min, 11 sec

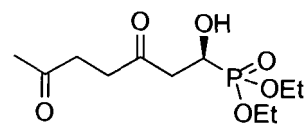

6g

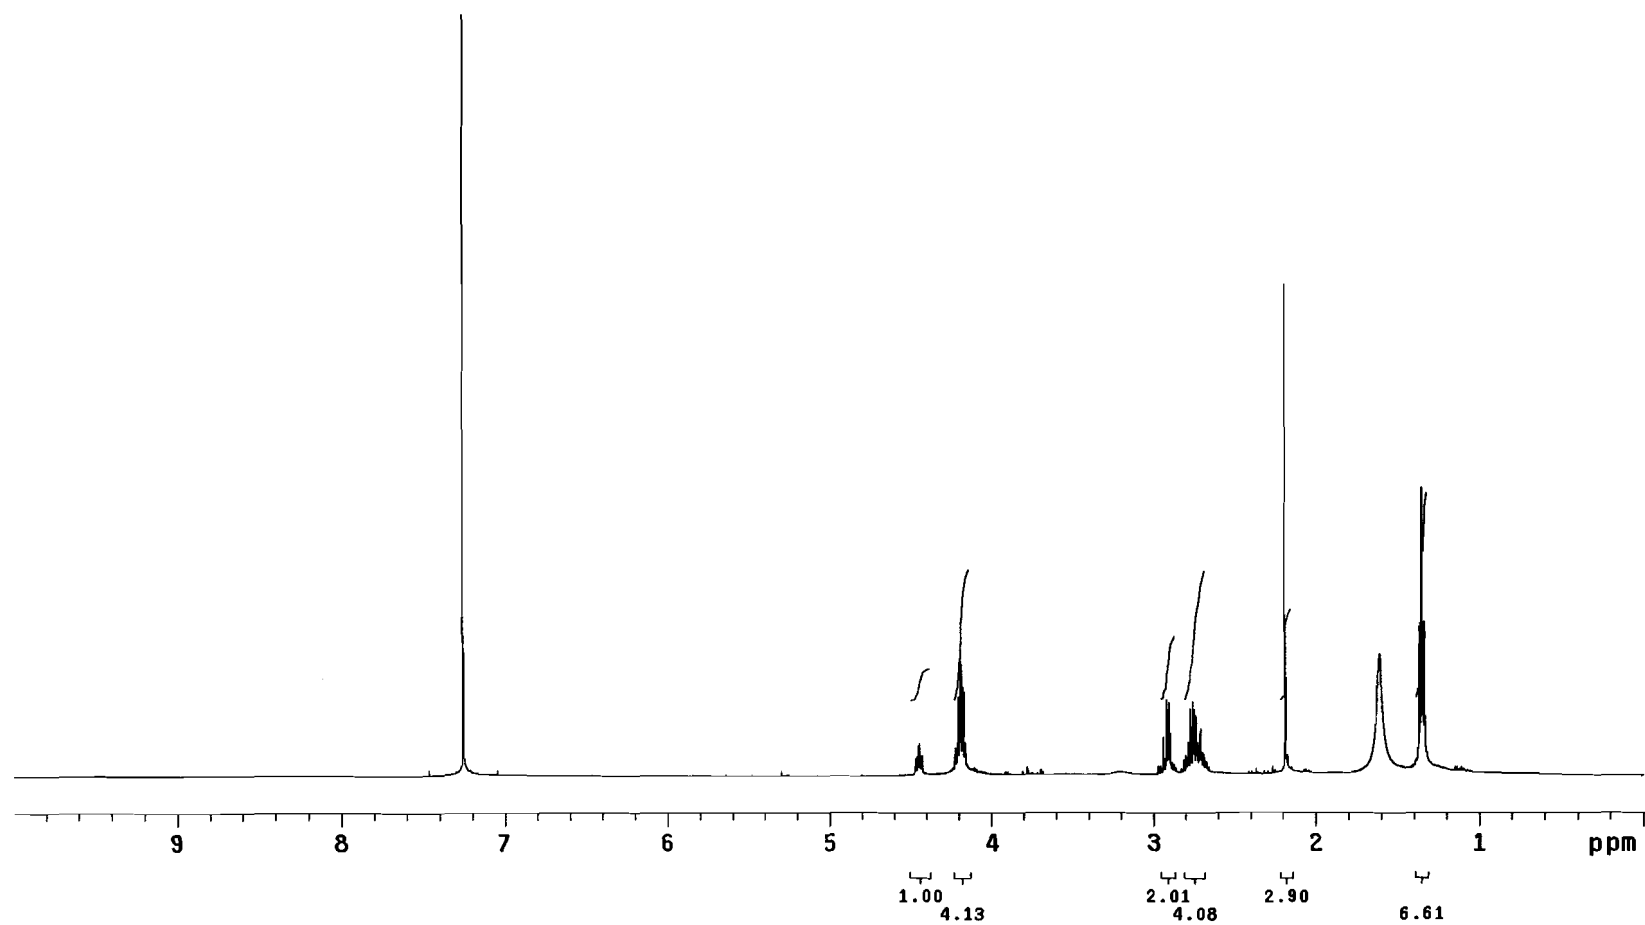

V-DR-31-13C

Archive directory: /home/drajasek/vnmrsys/data  
Sample directory:  
File: CARBON

Pulse Sequence: s2pu1

Solvent: CDC13  
Ambient temperature  
Mercury-300BB "Varian300"

Relax. delay 1.000 sec  
Pulse 45.0 degrees  
Acq. time 1.815 sec  
Width 18832.4 Hz  
14144 repetitions  
OBSERVE C13, 75.3709880 MHz  
DECUPLE H1, 299.7467965 MHz  
Power 33 dB  
continuously on  
WALTZ-16 modulated  
DATA PROCESSING  
Line broadening 1.0 Hz  
FT size 131072  
Total time 16 hr, 11 min, 18 sec

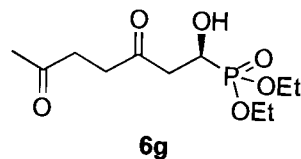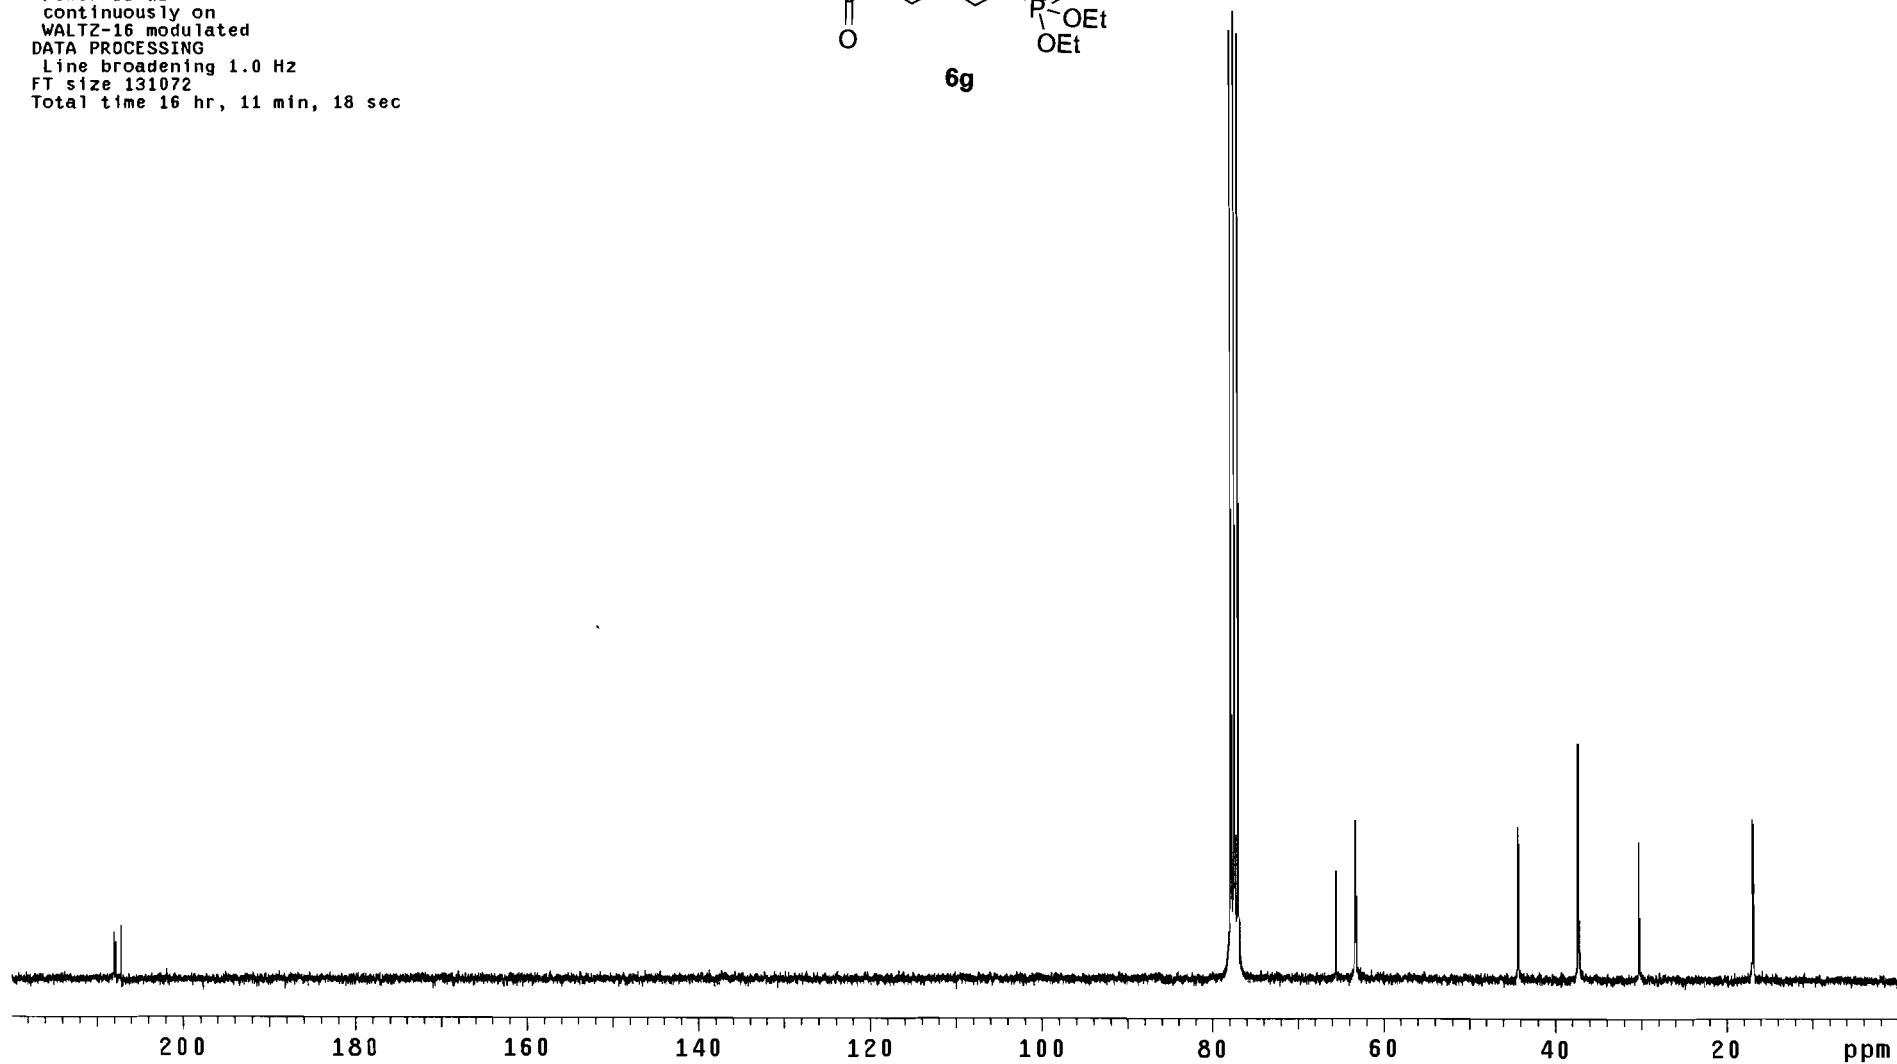

V-DR-27-1H

Archive directory: /export/home/vnmr1/vnmrsys/data  
Sample directory:  
File: PROTON

Pulse Sequence: s2pu1

Solvent: CDC13  
Ambient temperature  
INOVA-500 "Inova500"

Relax. delay 1.000 sec  
Pulse 36.4 degrees  
Acq. time 1.892 sec  
Width 7996.0 Hz  
4 repetitions  
OBSERVE H1, 499.6931887 MHz  
DATA PROCESSING  
FT size 32768  
Total time 0 min, 11 sec

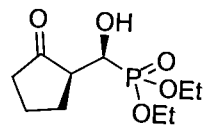

6h

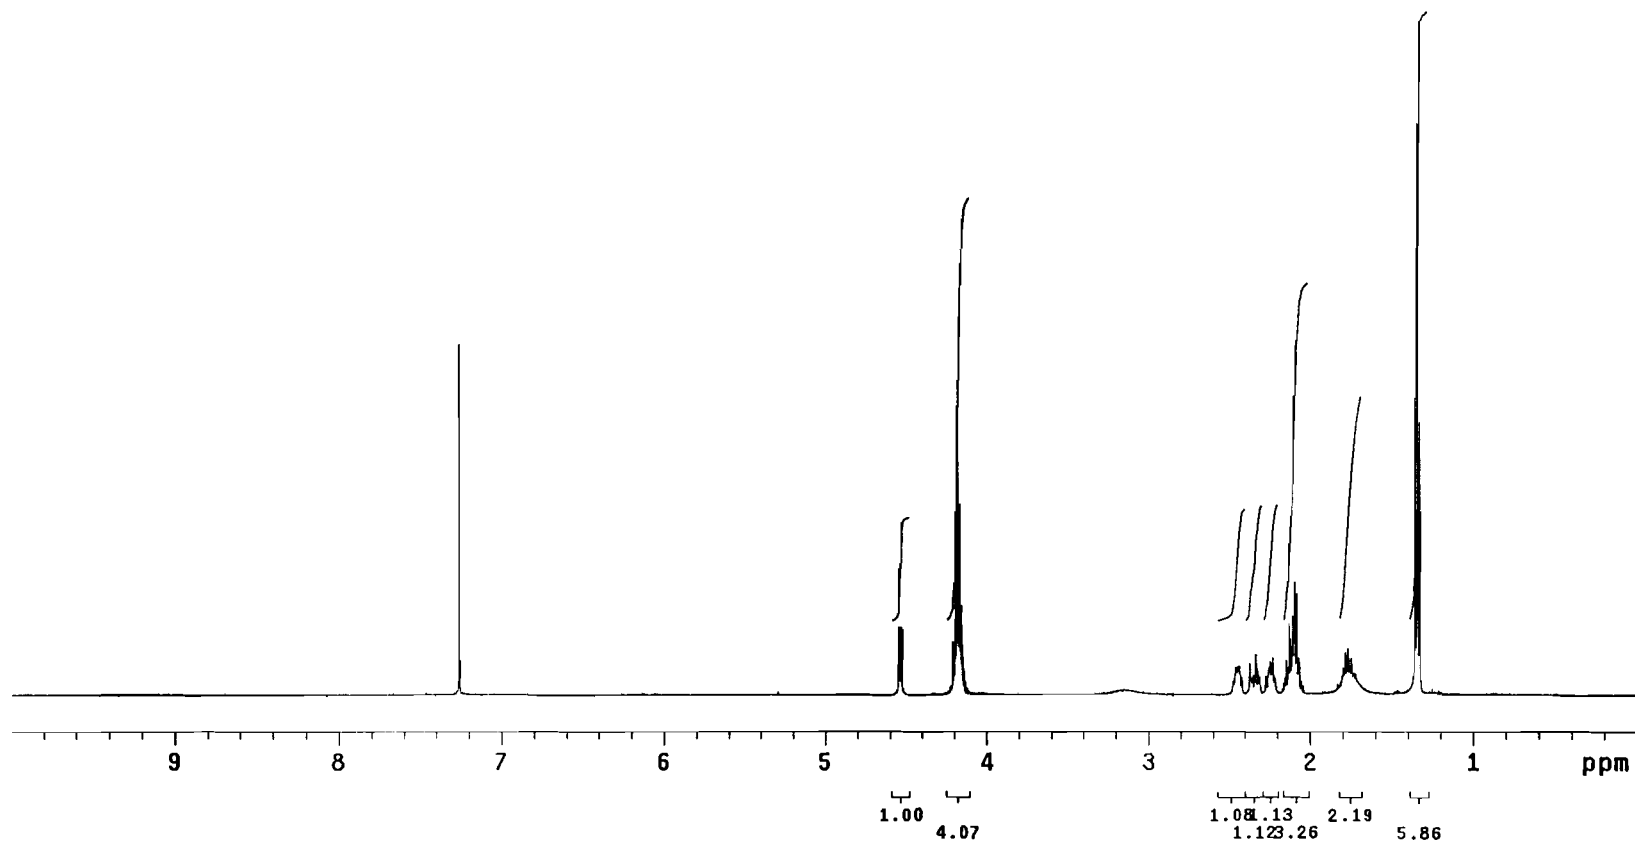

V-DR-27-13C

Archive directory: /home/drajasek/vnmrsys/data  
Sample directory:

Pulse Sequence: s2pul  
Solvent: CDCl3  
Ambient temperature  
User: 1-14-87  
File: V-DR-27-13C  
INOVA-500 "Inova500"

Relax. delay 1.000 sec  
Pulse 45.0 degrees  
Acq. time 1.300 sec  
Width 31409.5 Hz  
960 repetitions  
OBSERVE C13, 125.6479222 MHz  
DECOUPLE H1, 499.6956872 MHz  
Power 36 dB  
continuously on  
WALTZ-16 modulated  
DATA PROCESSING  
Line broadening 0.5 Hz  
FT size 131072  
Total time 3 hr, 12 min, 26 sec

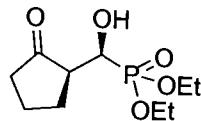

6h

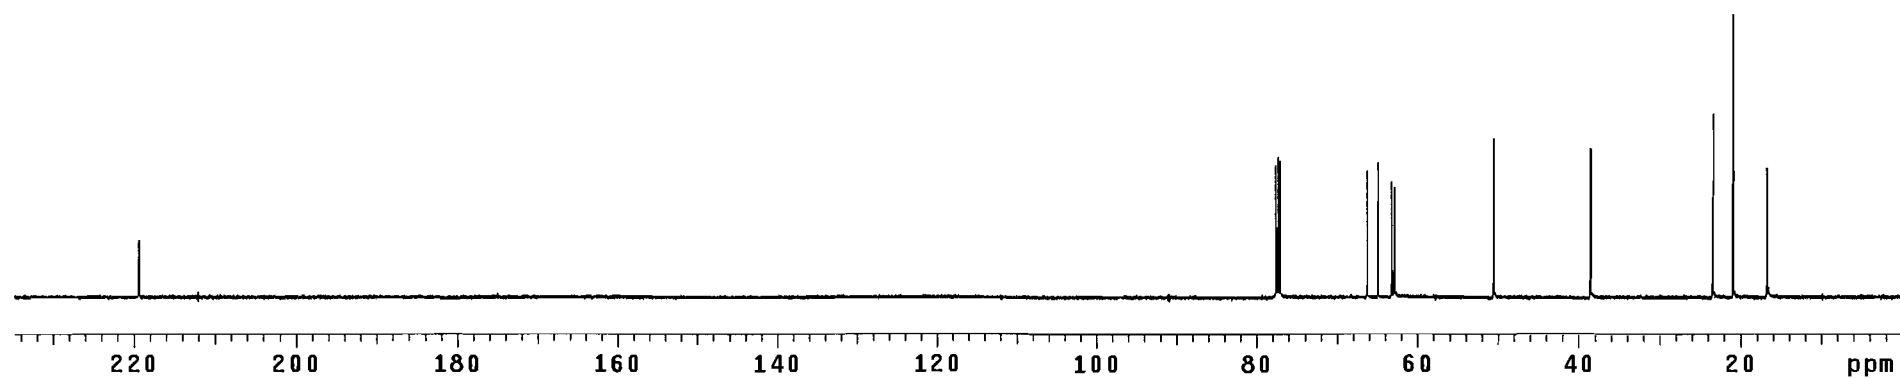

V-DR-46-1H

Archive directory: /home/drajasek/vnmrsys/data  
Sample directory:

Pulse Sequence: s2pu1

Solvent: CDC13  
Ambient temperature  
File: V-DR-cyclohexanone-proton  
INOVA-500 "Inova500"

Relax. delay 1.000 sec  
Pulse 45.0 degrees  
Acq. time 1.892 sec  
Width 7995.2 Hz  
8 repetitions  
OBSERVE H1, 499.6931887 MHz  
DATA PROCESSING  
FT size 32768  
Total time 0 min, 23 sec

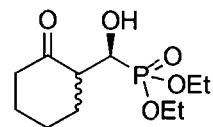

6i

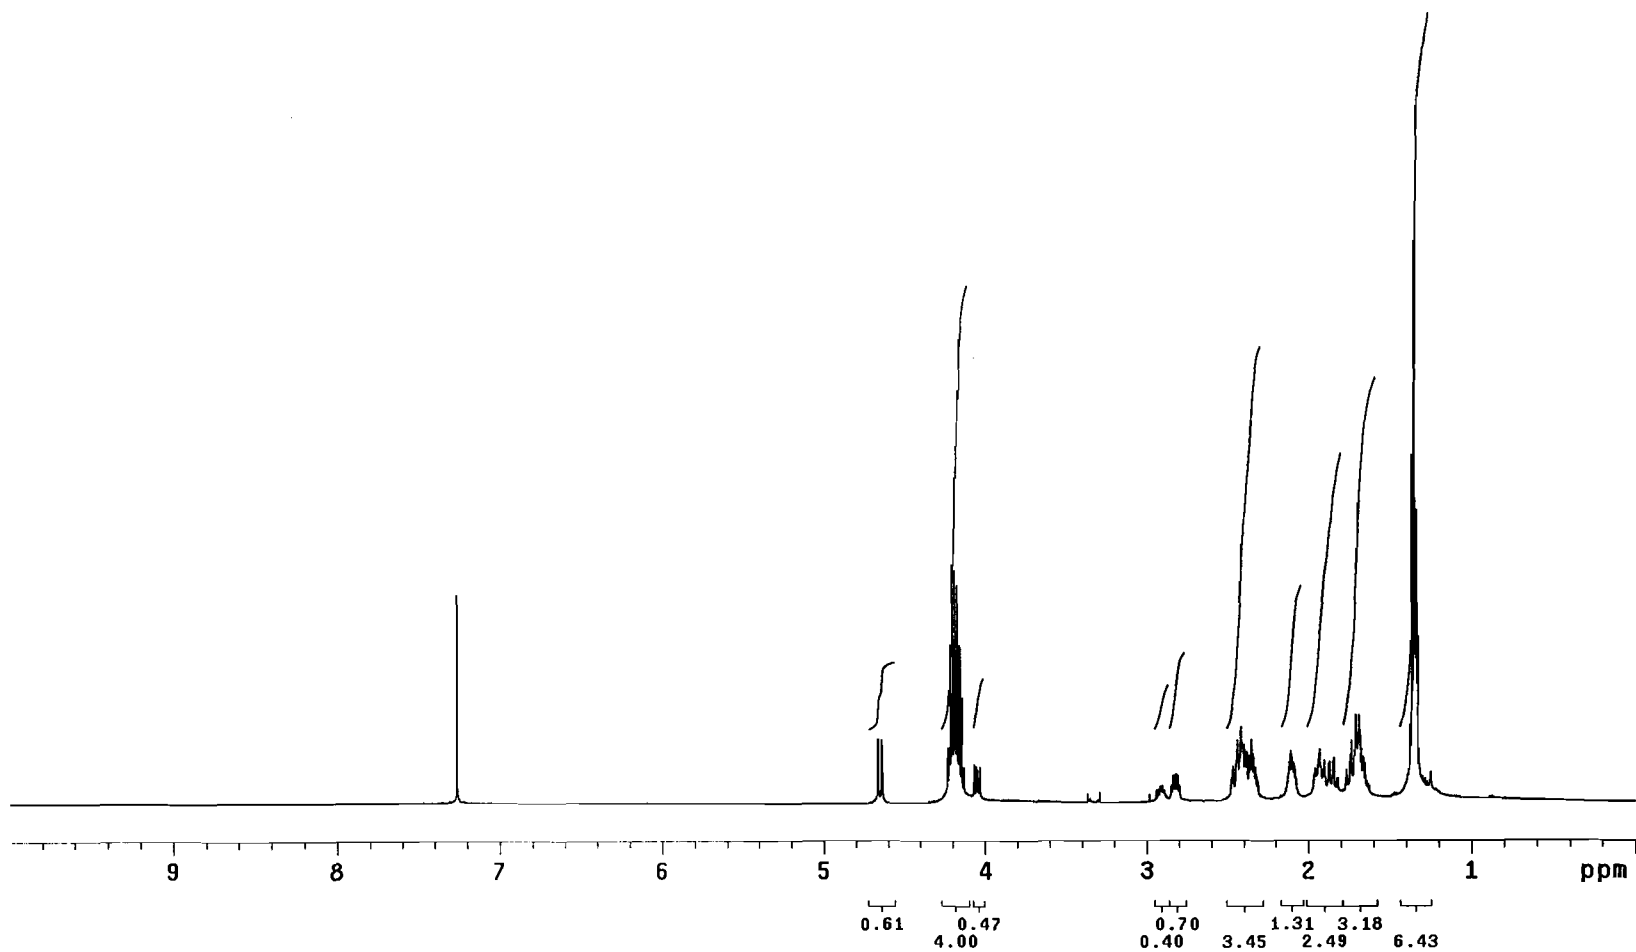

V-DR-46-13C

Archive directory: /home/drajasek/vnmrsys/data  
Sample directory:

Pulse Sequence: s2pu1

Solvent: CDCl3  
Ambient temperature  
User: 1-14-87  
File: V-DR-50-13C  
INOVA-500 "Inova500"

Relax. delay 1.000 sec  
Pulse 45.0 degrees  
Acq. time 1.300 sec  
Width 31409.5 Hz  
3136 repetitions  
OBSERVE C13, 125.6479222 MHz  
DECOUPLE H1, 499.6956872 MHz  
Power 36 dB  
continuously on  
WALTZ-16 modulated  
DATA PROCESSING  
Line broadening 0.5 Hz  
FT size 131072  
Total time 2 hr, 33 min, 57 sec

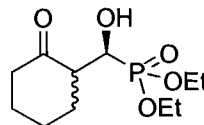

6i

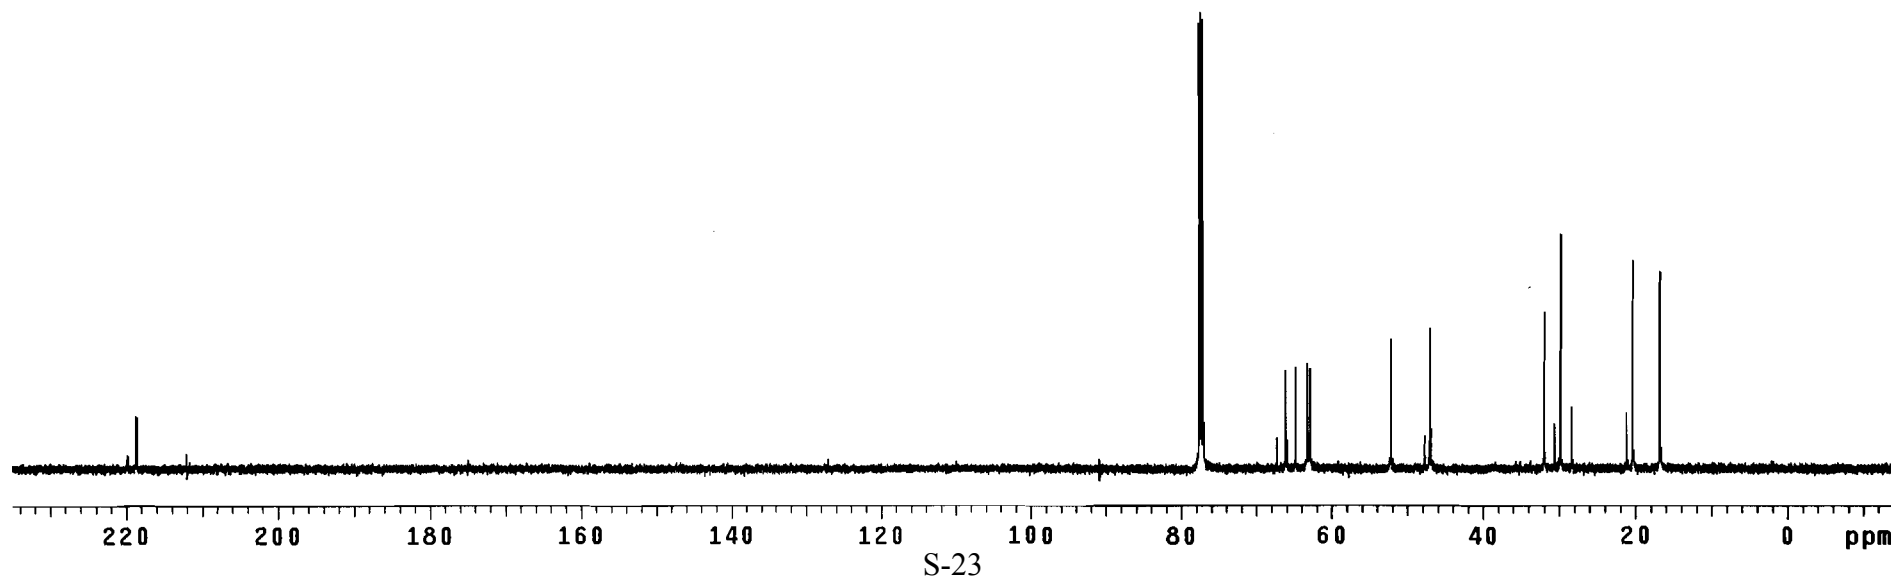

V-DR-45-1H

Archive directory: /home/drajasek/vnmrsys/data  
Sample directory:

Pulse Sequence: s2pu1

Solvent: CDC13  
Ambient temperature  
File: V-DR-45-1H  
INOVA-500 "Inova500"

Relax. delay 1.000 sec  
Pulse 45.0 degrees  
Acq. time 1.892 sec  
Width 7995.2 Hz  
8 repetitions  
OBSERVE H1, 499.6931887 MHz  
DATA PROCESSING  
FT size 32768  
Total time 0 min, 23 sec

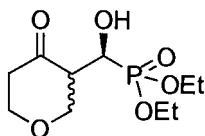

6j

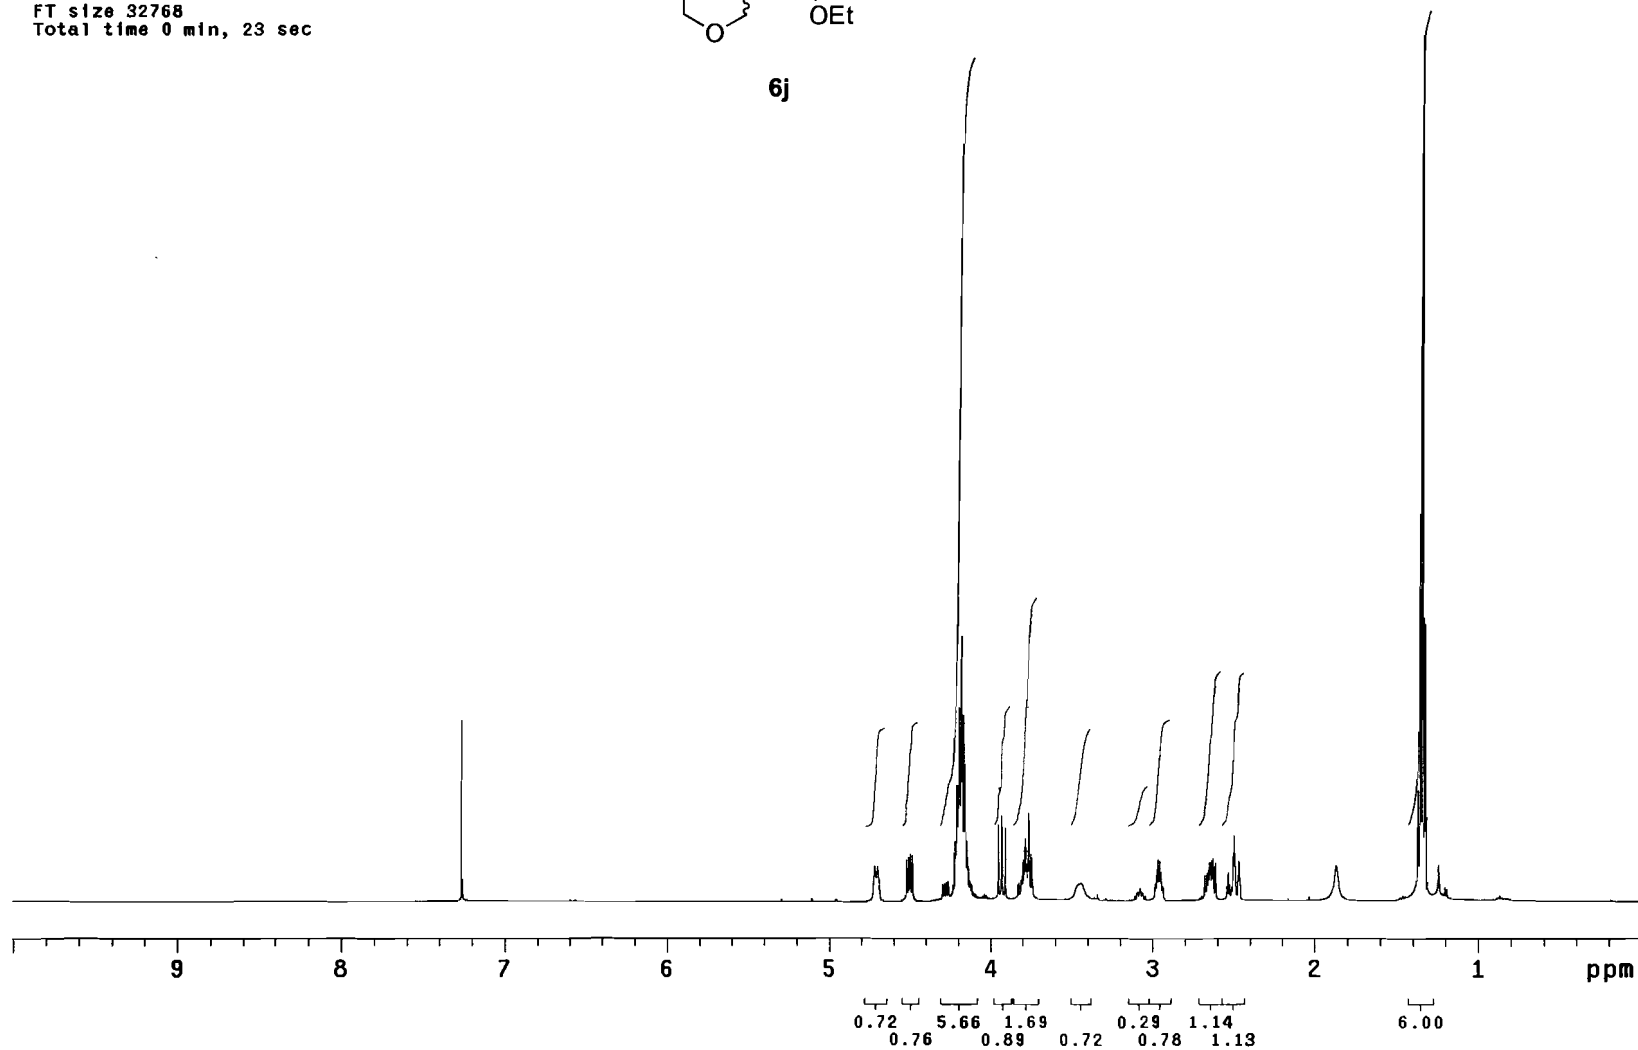



V-DR-45-13C

Archive directory: /home/drajasek/vnmrsys/data  
Sample directory:

Pulse Sequence: s2pu1

Solvent: CDC13  
Ambient temperature  
File: V-DR-38-13C  
Mercury-300BB "Varian300"

Relax. delay 1.000 sec  
Pulse 45.0 degrees  
Acq. time 1.815 sec  
Width 18832.4 Hz  
12000 repetitions  
OBSERVE C13, 75.3709880 MHz  
DECOUPLE H1, 299.7467965 MHz  
Power 33 dB  
continuously on  
WALTZ-16 modulated  
DATA PROCESSING  
Line broadening 1.0 Hz  
FT size 131072  
Total time 9 hr, 42 min, 59 sec

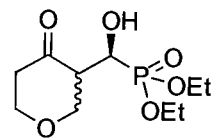

6j

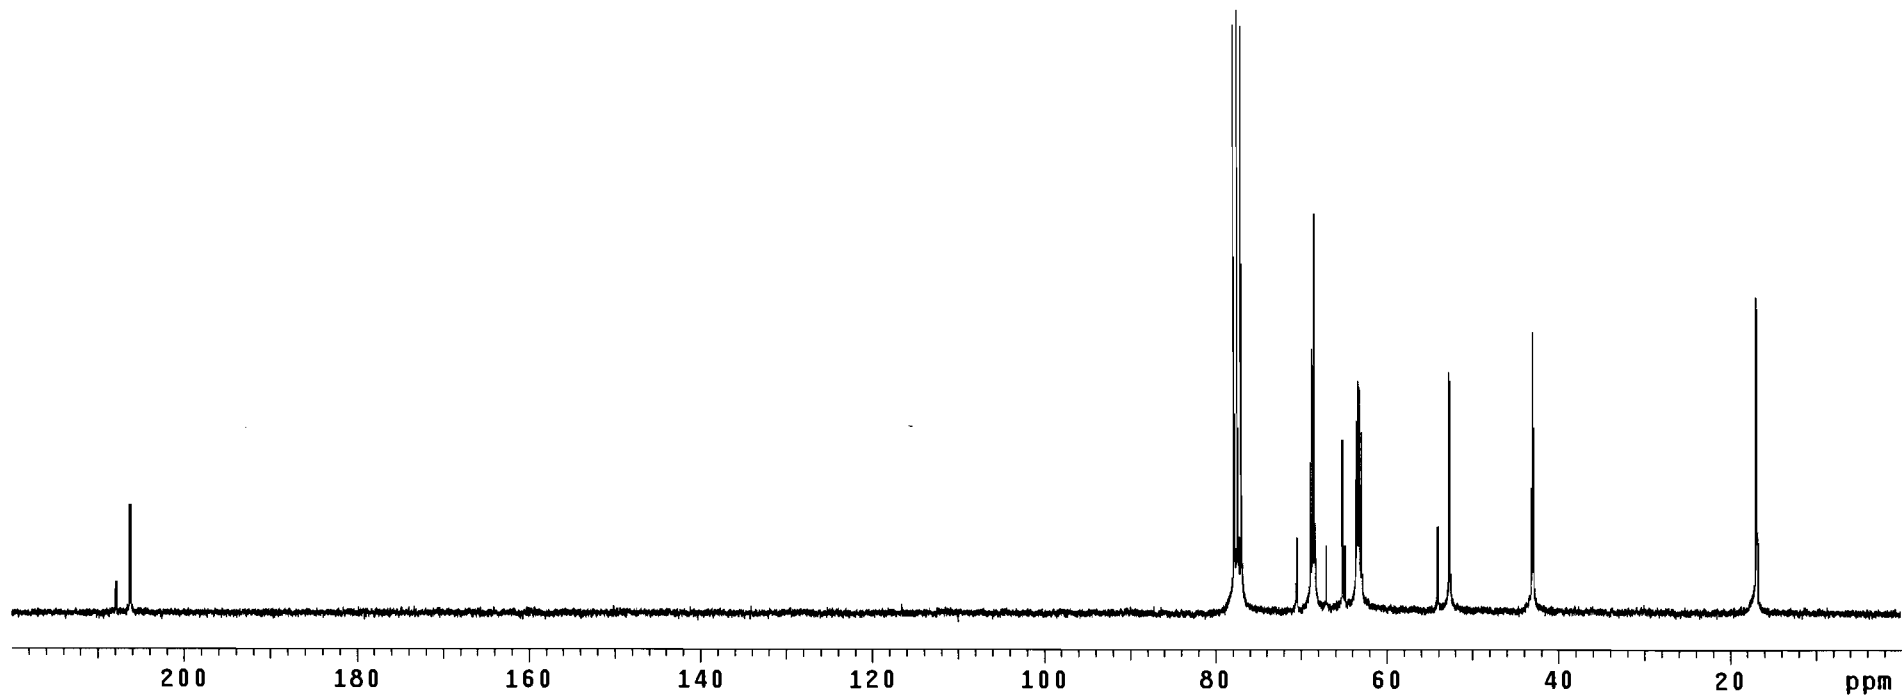

V-DR-44-1H

Archive directory: /export/home/vnmr1/vnmrsys/data  
Sample directory:

Pulse Sequence: s2pu1

Solvent: CDCl3

Ambient temperature

File: V-DR-40-1Ha

INOVA-500 "Inova500"

Relax. delay 1.000 sec

Pulse 36.4 degrees

Acq. time 1.892 sec

Width 7996.0 Hz

8 repetitions

OBSERVE H1, 499.6931887 MHz

DATA PROCESSING

FT size 32768

Total time 0 min, 23 sec

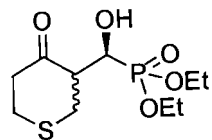

6k

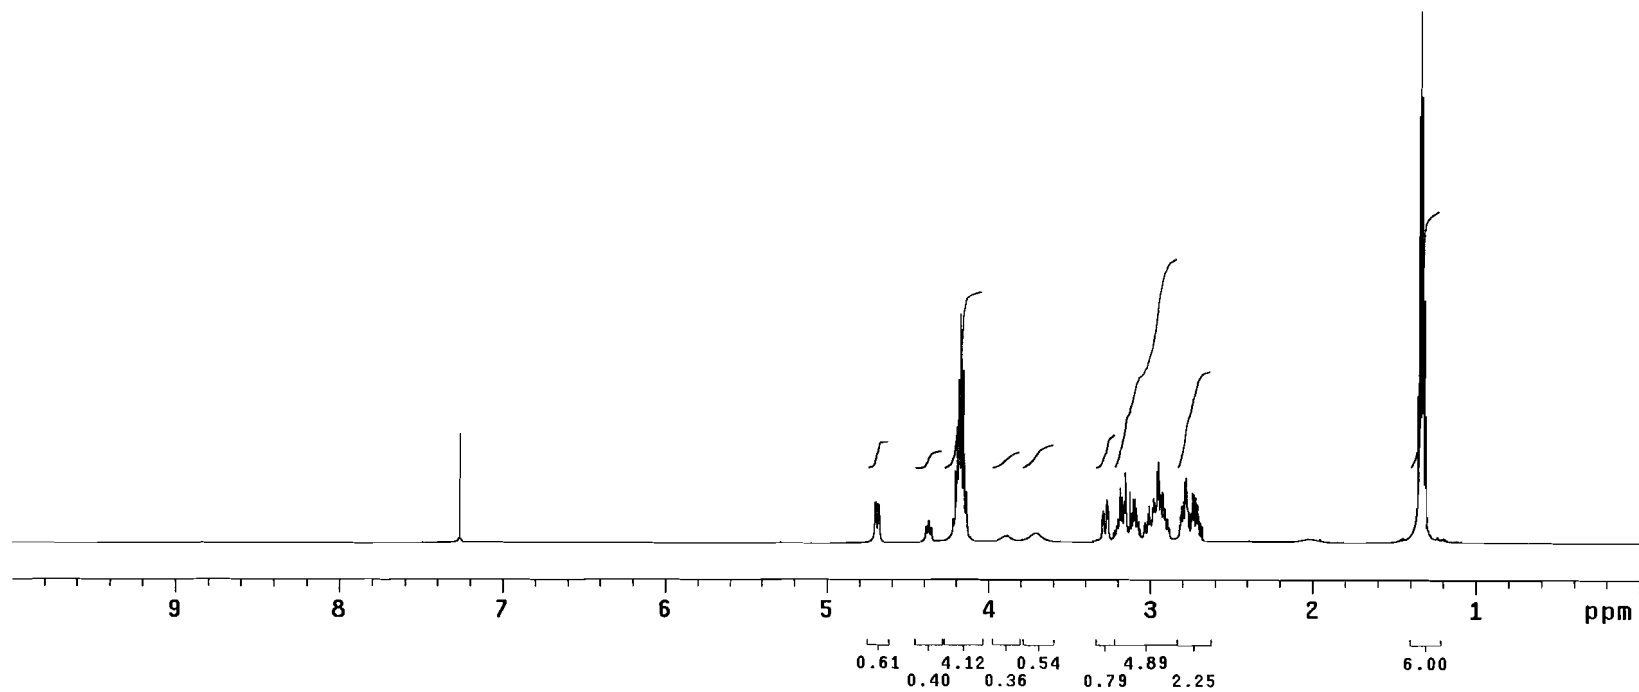

V-DR-44-13C

Archive directory: /home/drajasek/vnmrsys/data  
Sample directory:

Pulse Sequence: s2pu1

Solvent: CDCl3  
Ambient temperature  
User: 1-14-87  
File: V-DR-40-13C  
INOVA-500 "Inova500"

Relax. delay 1.000 sec  
Pulse 45.0 degrees  
Acq. time 1.300 sec  
Width 31409.5 Hz  
20000 repetitions  
OBSERVE C13, 125.6479222 MHz  
DECOUPLE H1, 499.6956872 MHz  
Power 36 dB  
continuously on  
WALTZ-16 modulated  
DATA PROCESSING  
Line broadening 0.5 Hz  
FT size 131072  
Total time 12 hr, 49 min, 47 sec

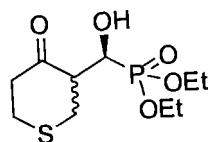

6k

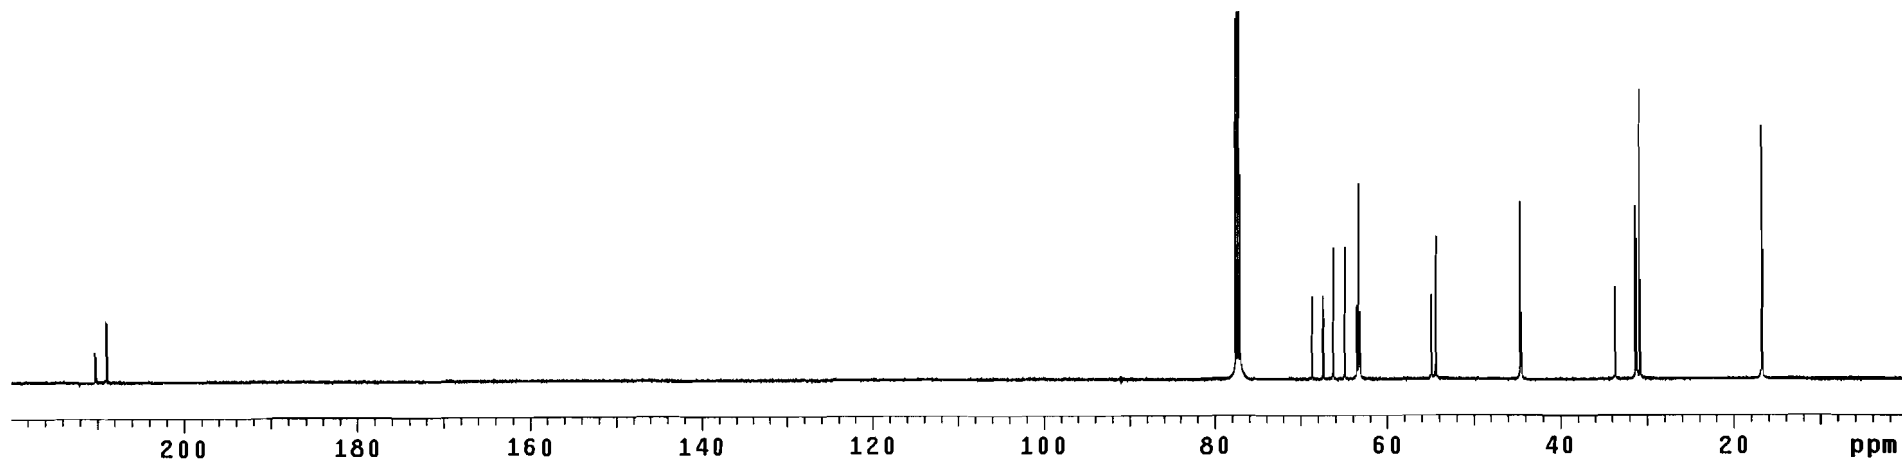

V-DR-84-1H

Archive directory: /home/drajasek/vnmrsys/data  
Sample directory:  
File: PROTON

Pulse Sequence: s2pu1

Solvent: CDCl3  
Ambient temperature  
INOVA-500 "Inova500"

Relax. delay 1.000 sec  
Pulse 45.0 degrees  
Acq. time 1.892 sec  
Width 7995.2 Hz  
32 repetitions  
OBSERVE H1, 499.6931887 MHz  
DATA PROCESSING  
FT size 32768  
Total time 1 min, 32 sec

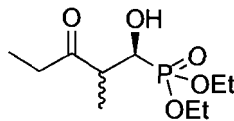

6I

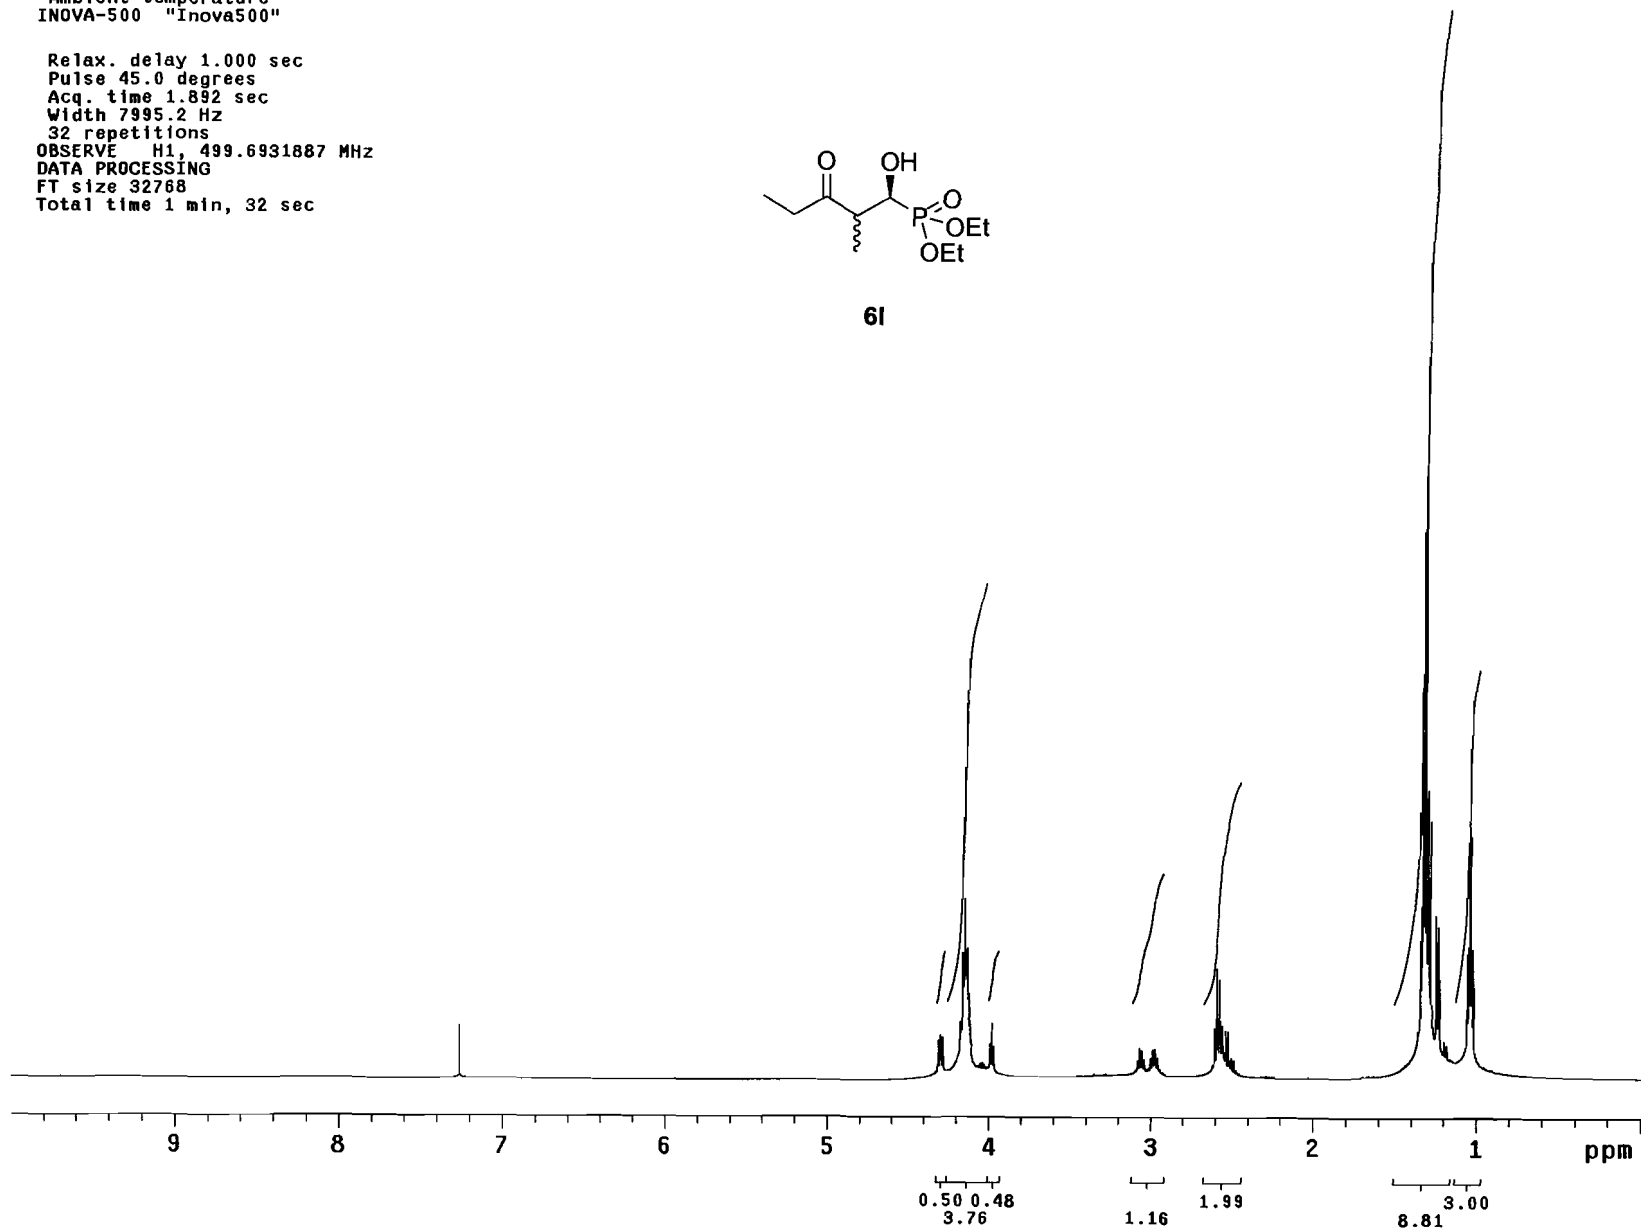

S-28

V-DR-84-13Ca

Archive directory: /home/drajasek/vnmrsys/data  
Sample directory:  
File: CARBON

Pulse Sequence: s2pu1

Solvent: CDC13  
Ambient temperature  
User: 1-14-87  
INNOVA-500 "Inova500"

Relax. delay 1.000 sec  
Pulse 45.0 degrees  
Acq. time 1.300 sec  
Width 31409.5 Hz  
22000 repetitions  
OBSERVE C13, 125.6479222 MHz  
DECOUPLE H1, 499.6956872 MHz  
Power 36 dB  
continuously on  
WALTZ-16 modulated  
DATA PROCESSING  
Line broadening 0.5 Hz  
FT size 131072  
Total time 14 hr, 6 min, 46 sec

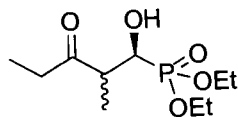

6I

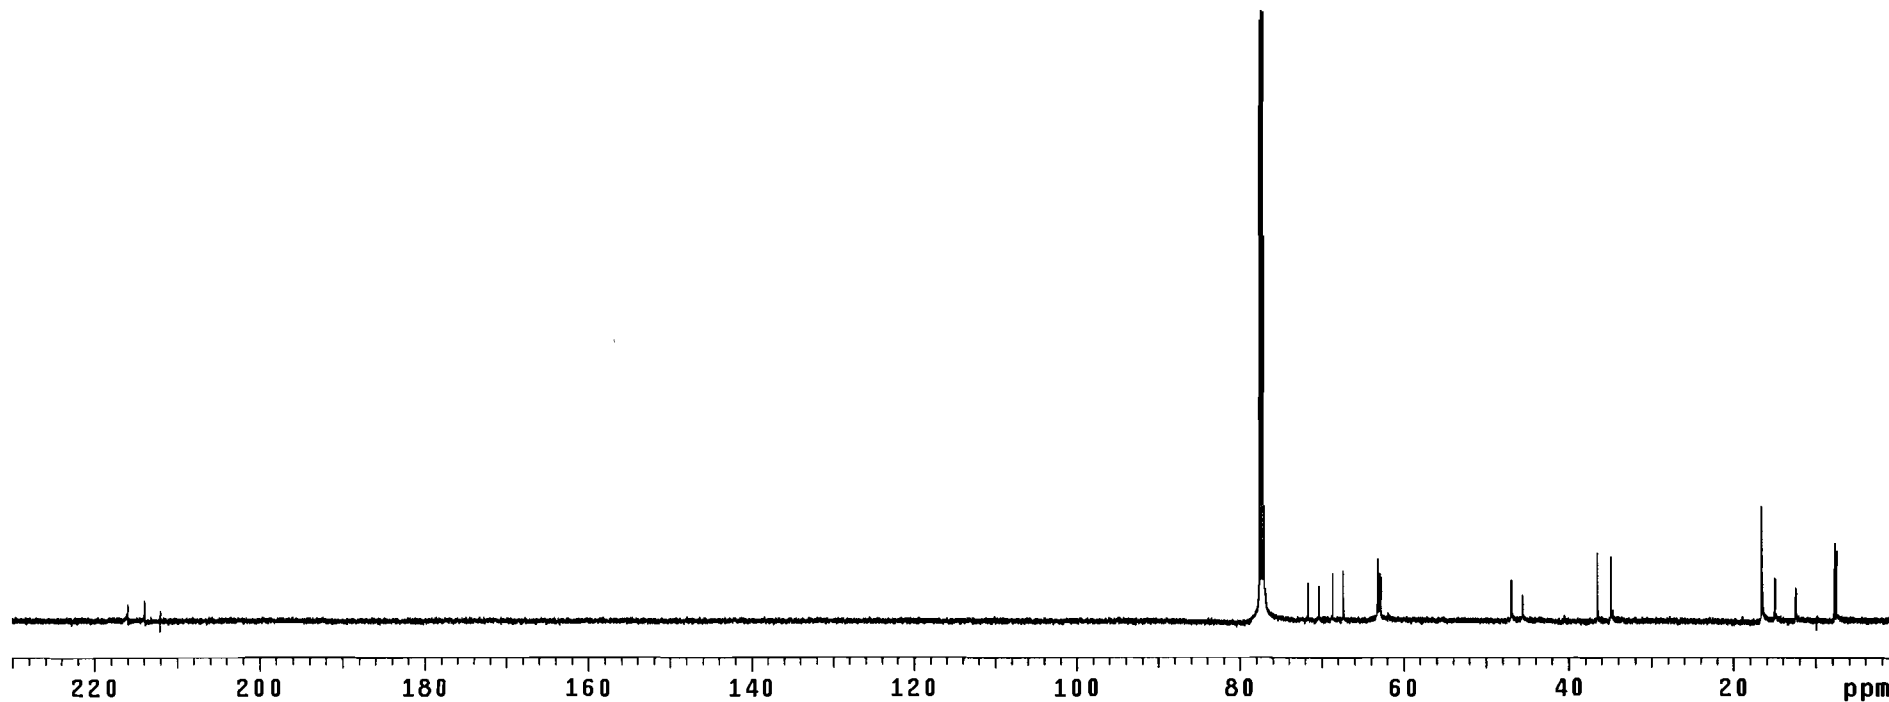

V-DR-75-1H

Archive directory: /export/home/vnmr1/vnmrsys/data  
Sample directory:  
File: PROTON

Pulse Sequence: s2pu1

Solvent: CDCl3  
Ambient temperature  
INOVA-500 "Inova500"

Relax. delay 1.000 sec  
Pulse 36.4 degrees  
Acq. time 1.892 sec  
Width 7996.0 Hz  
16 repetitions  
OBSERVE H1, 499.6931887 MHz  
DATA PROCESSING  
FT size 32768  
Total time 0 min, 46 sec

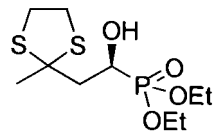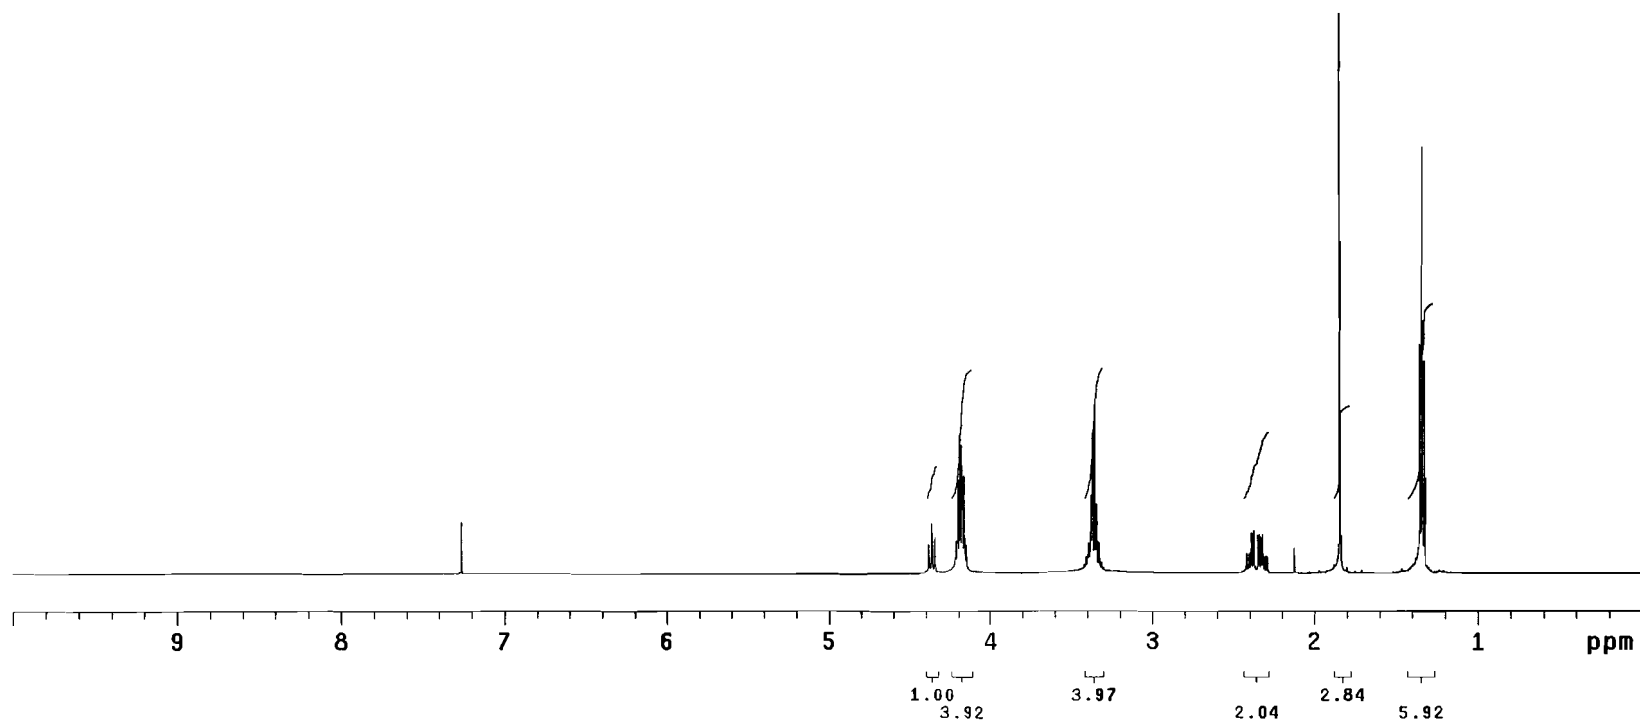

V-DR-75-13C

Archive directory: /home/drajasek/vnmrsys/data  
Sample directory:

Pulse Sequence: s2pul

Solvent: CDCl3  
Ambient temperature  
User: 1-14-87  
File: V-DR-75-13C  
INOVA-500 "Inova500"

Relax. delay 1.000 sec  
Pulse 45.0 degrees  
Acq. time 1.300 sec  
Width 31409.5 Hz  
20000 repetitions  
OBSERVE C13, 125.6479222 MHz  
DECOUPLE H1, 499.6956872 MHz  
Power 36 dB  
continuously on  
WALTZ-16 modulated  
DATA PROCESSING  
Line broadening 0.5 Hz  
FT size 131072  
Total time 12 hr, 49 min, 47 sec

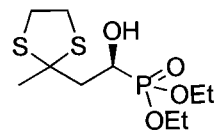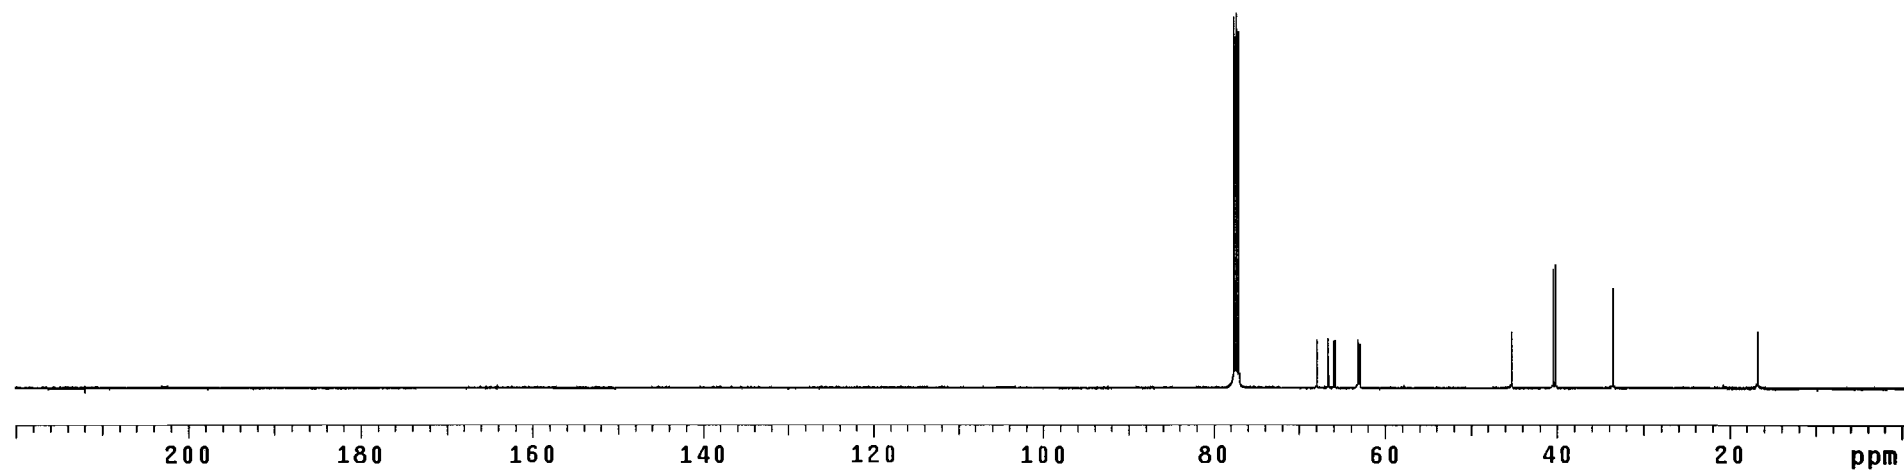

V-DR-79-1H

Archive directory: /home/drajasek/vnmrsys/data  
Sample directory:

Pulse Sequence: s2pu1

Solvent: CDC13  
Ambient temperature  
File: V-DR-76-1H  
INOVA-500 "Inova500"

Relax. delay 1.000 sec  
Pulse 45.0 degrees  
Acq. time 1.892 sec  
Width 7995.2 Hz  
32 repetitions  
OBSERVE H1, 499.6931887 MHz  
DATA PROCESSING  
FT size 32768  
Total time 1 min, 32 sec

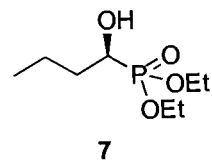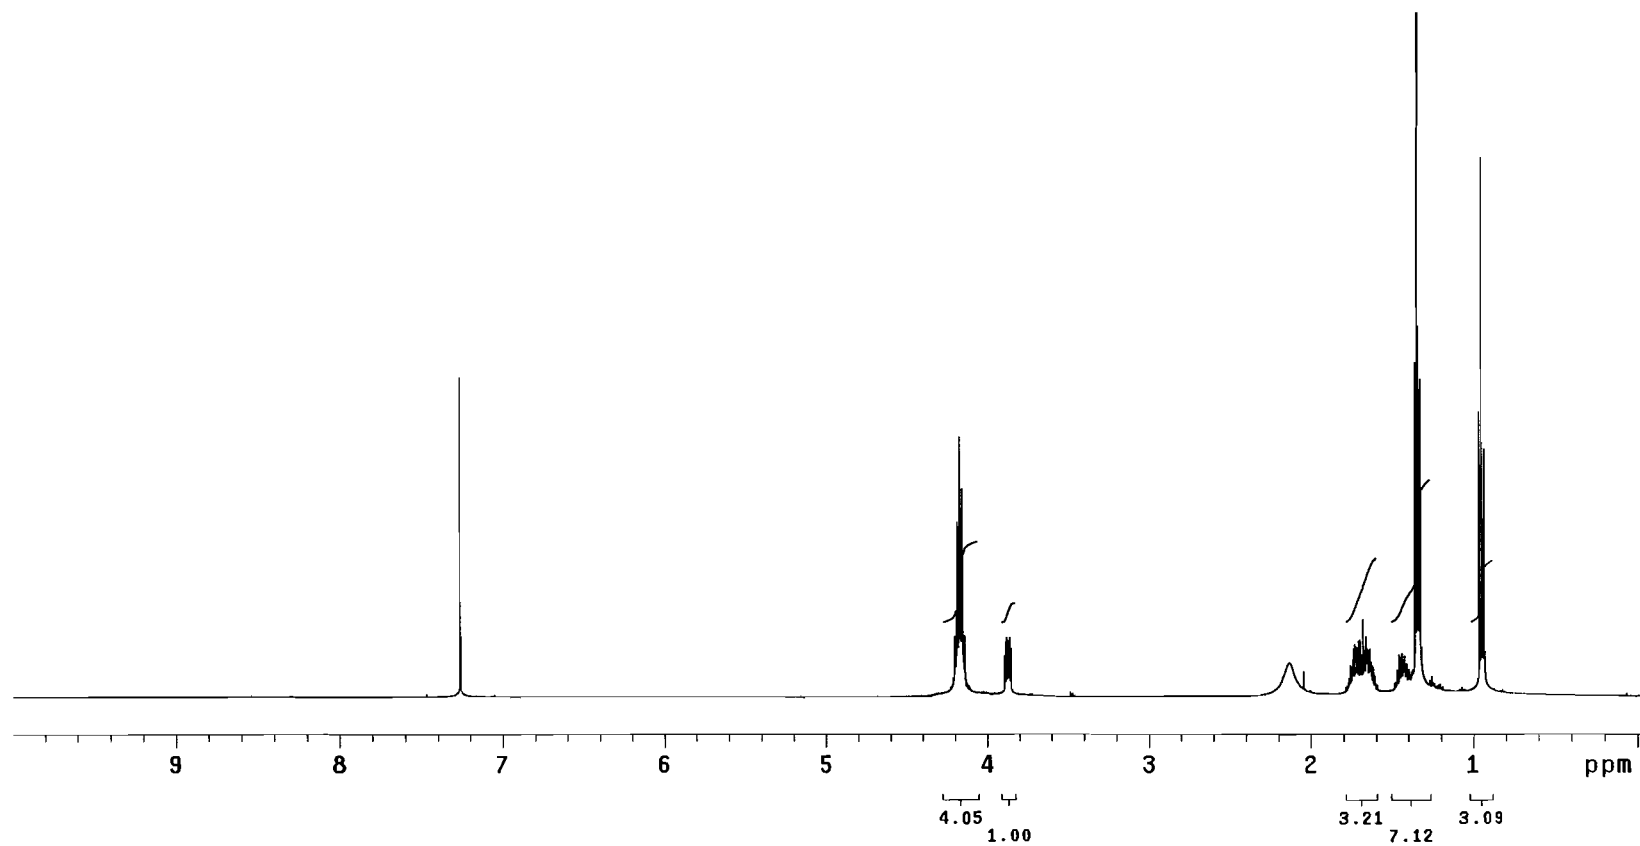



V-DR-79-13C

Archive directory: /home/drajasek/vnmrsys/data  
Sample directory:

Pulse Sequence: s2pu1

Solvent: CDCl3  
Ambient temperature  
User: 1-14-87  
File: V-DR-76-13Ca  
INOVA-500 "Inova500"

Relax. delay 1.000 sec  
Pulse 45.0 degrees  
Acq. time 1.300 sec  
Width 31409.5 Hz  
30000 repetitions  
OBSERVE C13, 125.6479222 MHz  
DECOUPLE H1, 499.6956872 MHz  
Power 36 dB  
continuously on  
WALTZ-16 modulated  
DATA PROCESSING  
Line broadening 0.5 Hz  
FT size 131072  
Total time 19 hr, 14 min, 41 sec

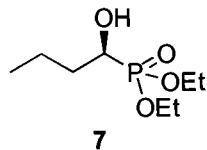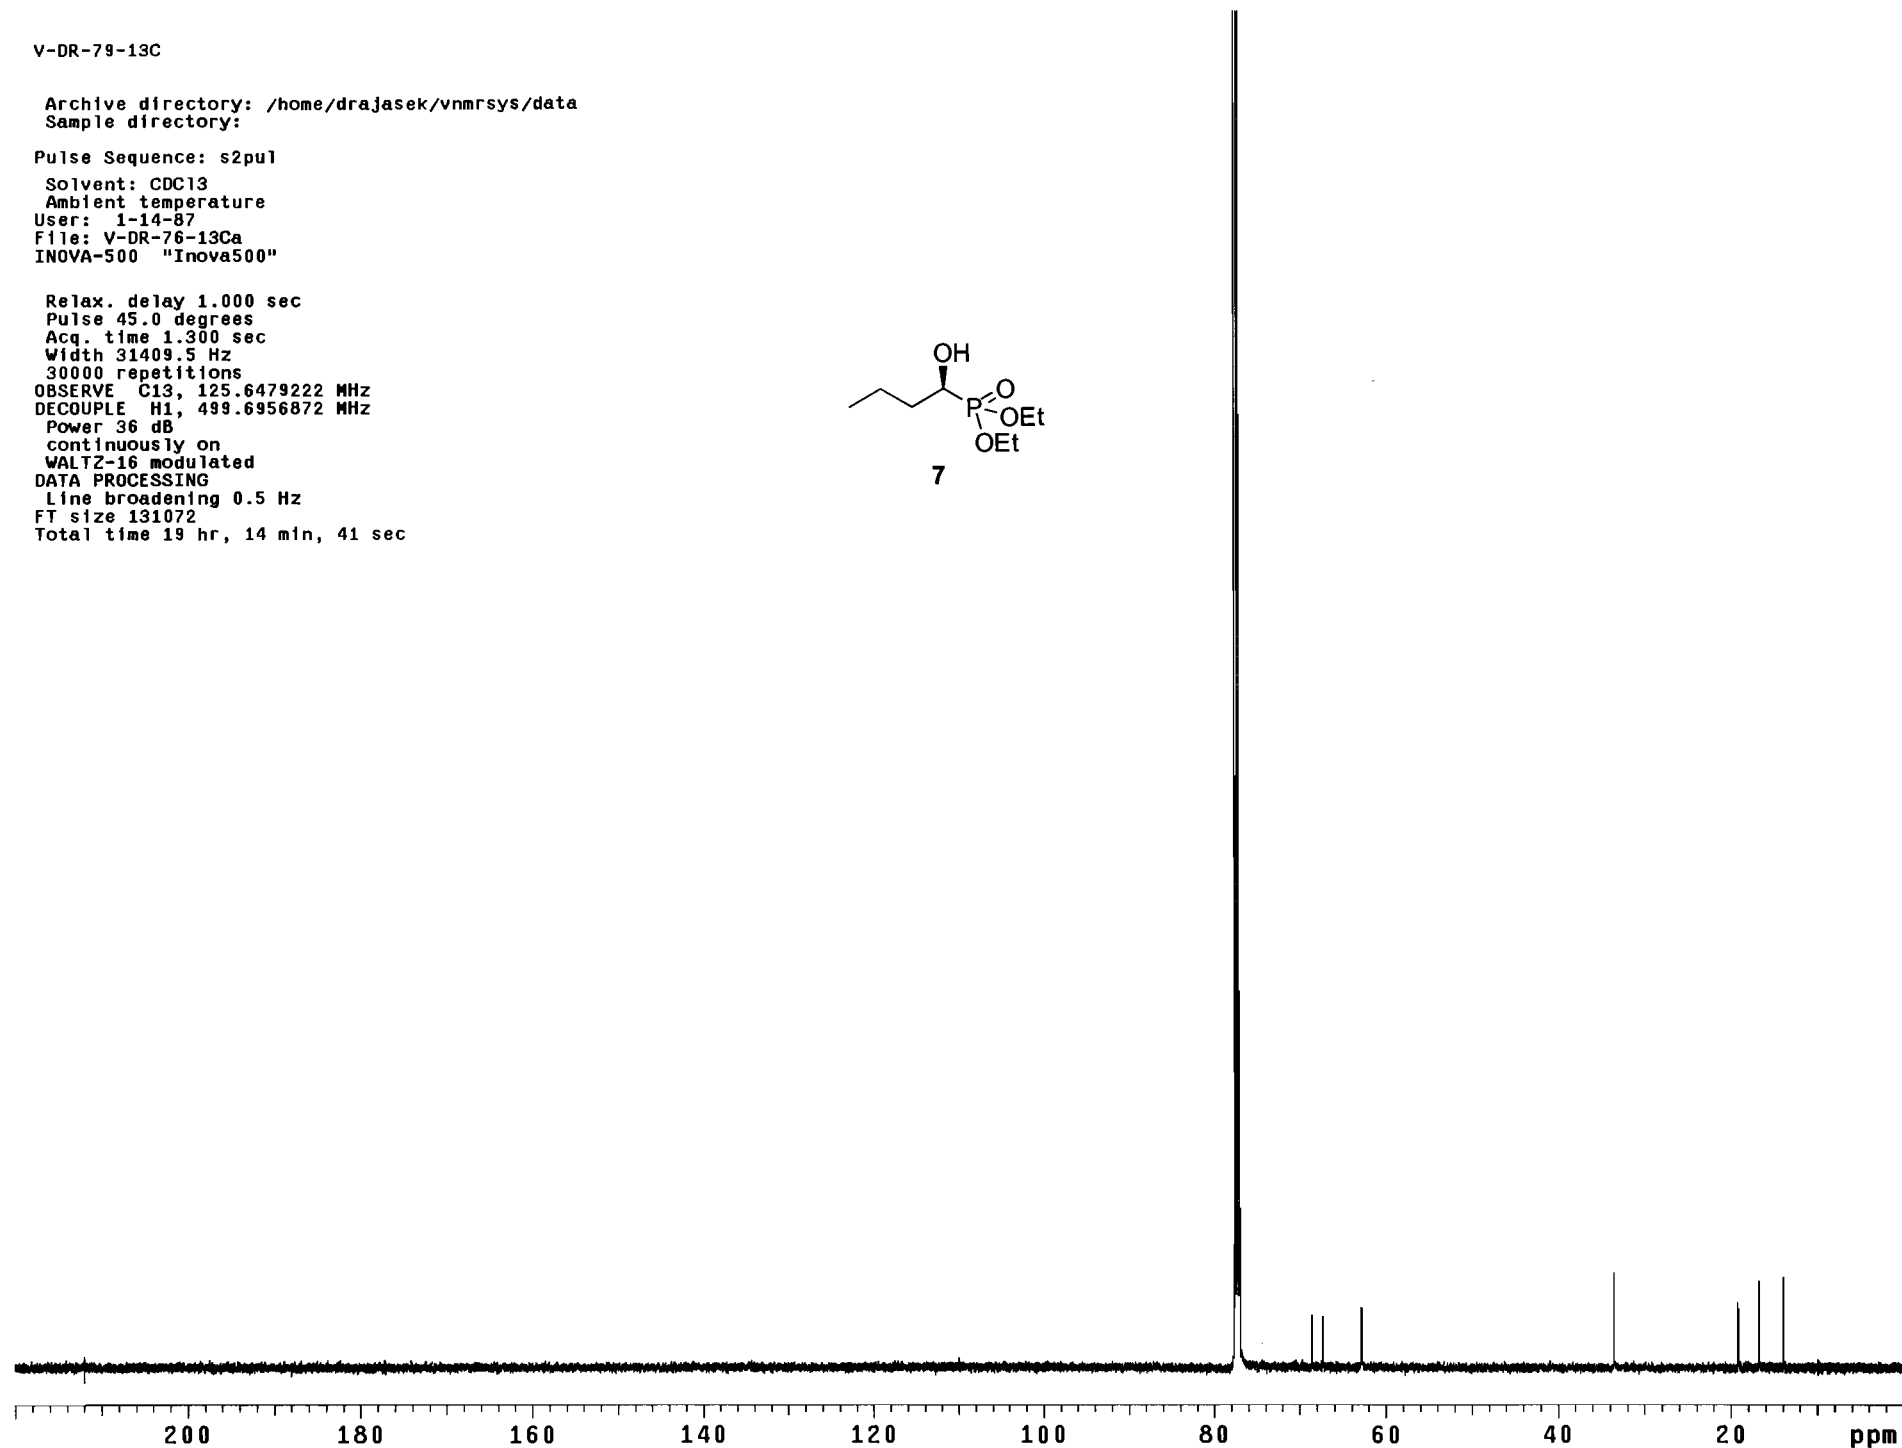

## DIETHYL ALPHAHYDROXYKETOPHOSPHONATE (ACETONE)

```

=====
Injection Date   : 3/22/2006 4:02:14 PM
Sample Name     : IV-DR-129                Location  : Vial 1
Acq. Operator   : dodda                    Inj       : 1
Acq. Instrument : Instrument 1              Inj Volume: Manually
Acq. Method     : C:\HPCHEM\1\METHODS\28-11-05.M
Last changed    : 3/22/2006 3:59:56 PM by dodda
                  (modified after loading)
Analysis Method : C:\HPCHEM\1\METHODS\28-11-05.M
Last changed    : 5/13/2006 10:34:28 PM by dodda
                  (modified after loading)

```

## VKF Method

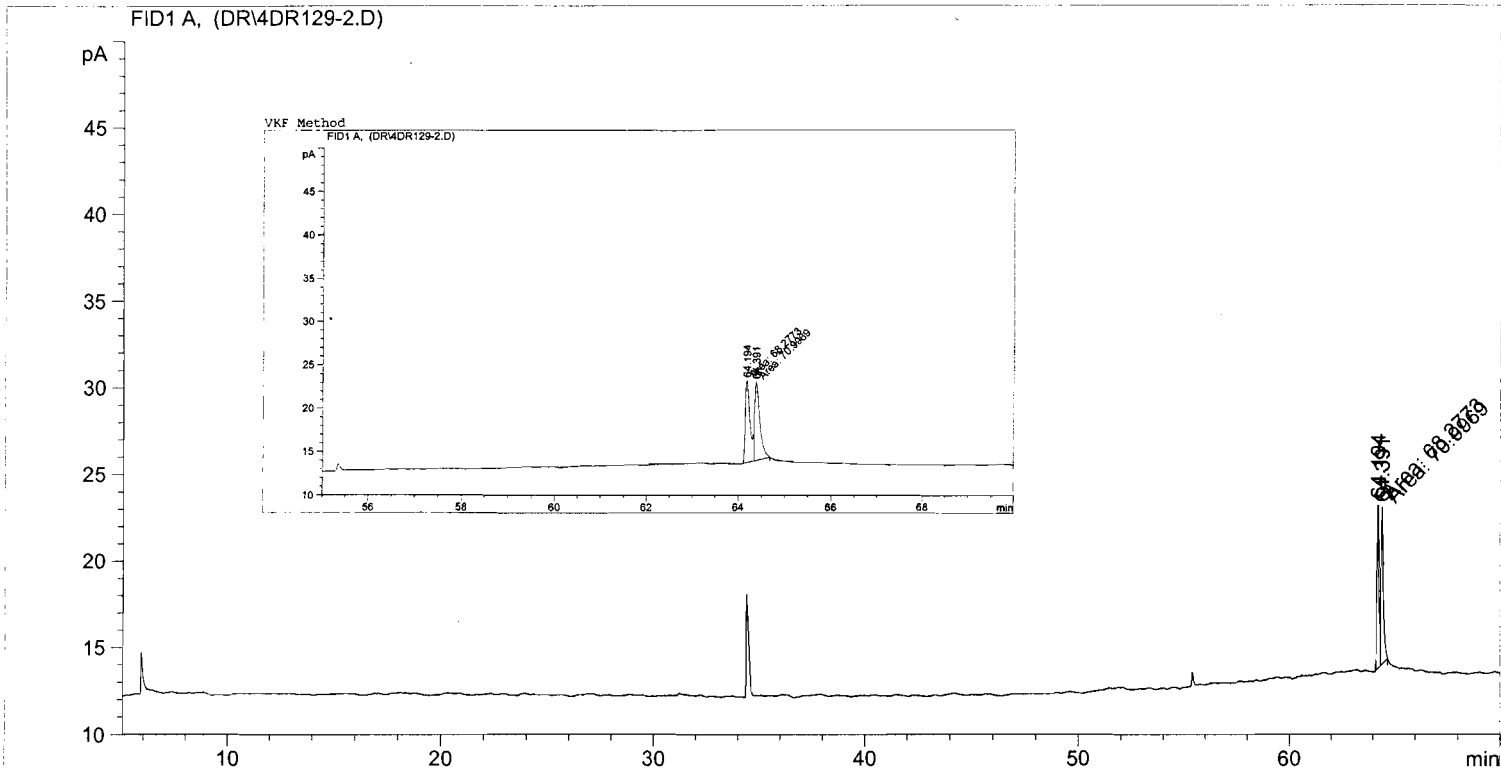

```

=====
                          Area Percent Report
=====

```

```

Sorted By      : Signal
Multiplier     : 1.0000
Dilution       : 1.0000
Sample Amount  : 2.00000 [ng/ul] (not used in calc.)
Use Multiplier & Dilution Factor with ISTDs

```

Signal 1: FID1 A,

| Peak # | RetTime [min] | Type | Width [min] | Area [pA*s] | Height [pA] | Area %   |
|--------|---------------|------|-------------|-------------|-------------|----------|
| 1      | 64.194        | MF   | 0.1196      | 68.27729    | 9.51382     | 49.02365 |
| 2      | 64.391        | FM   | 0.1300      | 70.99689    | 9.10277     | 50.97635 |

```
Totals :                139.27419    18.61659
```

Results obtained with standard integrator!

```

=====
                          Summed Peaks Report
=====

```

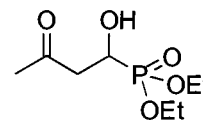

racemic

## DIETHYL ALPHAHYDROXYKETOPHOSPHONATE

```

=====
Injection Date   : 6/5/2006 11:26:07 AM
Sample Name     : V-DR-77-D
Acq. Operator   : dodda
Acq. Instrument : Instrument 1
Acq. Method     : C:\HPCHEM\1\METHODS\28-11-05.M
Last changed    : 6/5/2006 11:23:11 AM by dodda
                  (modified after loading)
Analysis Method : C:\HPCHEM\1\METHODS\28-11-05.M
Last changed    : 6/6/2006 9:31:07 AM by dodda
                  (modified after loading)
  
```

## VKF Method

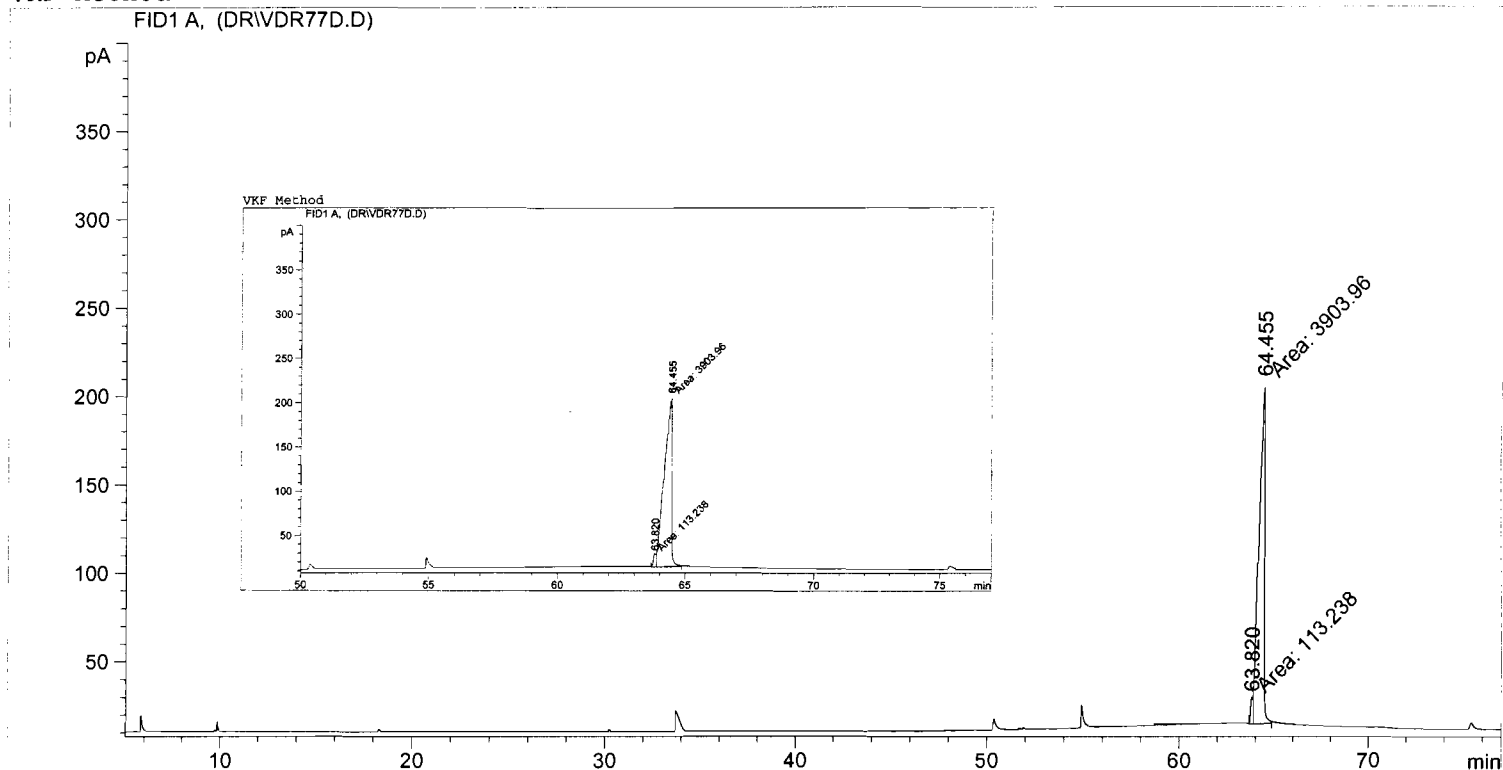

```

=====
Area Percent Report
=====
  
```

```

Sorted By      : Signal
Multiplier     : 1.0000
Dilution       : 1.0000
Sample Amount  : 2.00000 [ng/ul] (not used in calc.)
Use Multiplier & Dilution Factor with ISTDs
  
```

Signal 1: FID1 A,

| Peak # | RetTime [min] | Type | Width [min] | Area [pA*s] | Height [pA] | Area %   |
|--------|---------------|------|-------------|-------------|-------------|----------|
| 1      | 63.820        | MF   | 0.1257      | 113.23793   | 15.01011    | 2.81883  |
| 2      | 64.455        | FM   | 0.3374      | 3903.96094  | 192.85309   | 97.18117 |

```
Totals :                4017.19887  207.86320
```

Results obtained with standard integrator!

```

=====
Summed Peaks Report
=====
  
```

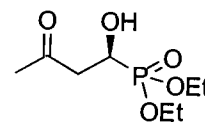

6a (94% ee)

## DIETHYL ALPHAHYDROXYKETOPHOSPHONATE(butanone)

```

=====
Injection Date   : 3/30/2006 11:29:25 AM
Sample Name     : IV-DR-132-G                Location  : Vial 1
Acq. Operator   : dodda                      Inj       : 1
Acq. Instrument : Instrument 1                Inj Volume: Manually
Acq. Method     : C:\HPCHEM\1\METHODS\28-11-05.M
Last changed    : 3/27/2006 2:42:01 PM by dodda
                  (modified after loading)
Analysis Method : C:\HPCHEM\1\METHODS\28-11-05.M
Last changed    : 4/3/2006 11:20:47 AM by dodda
                  (modified after loading)

```

## VKF Method

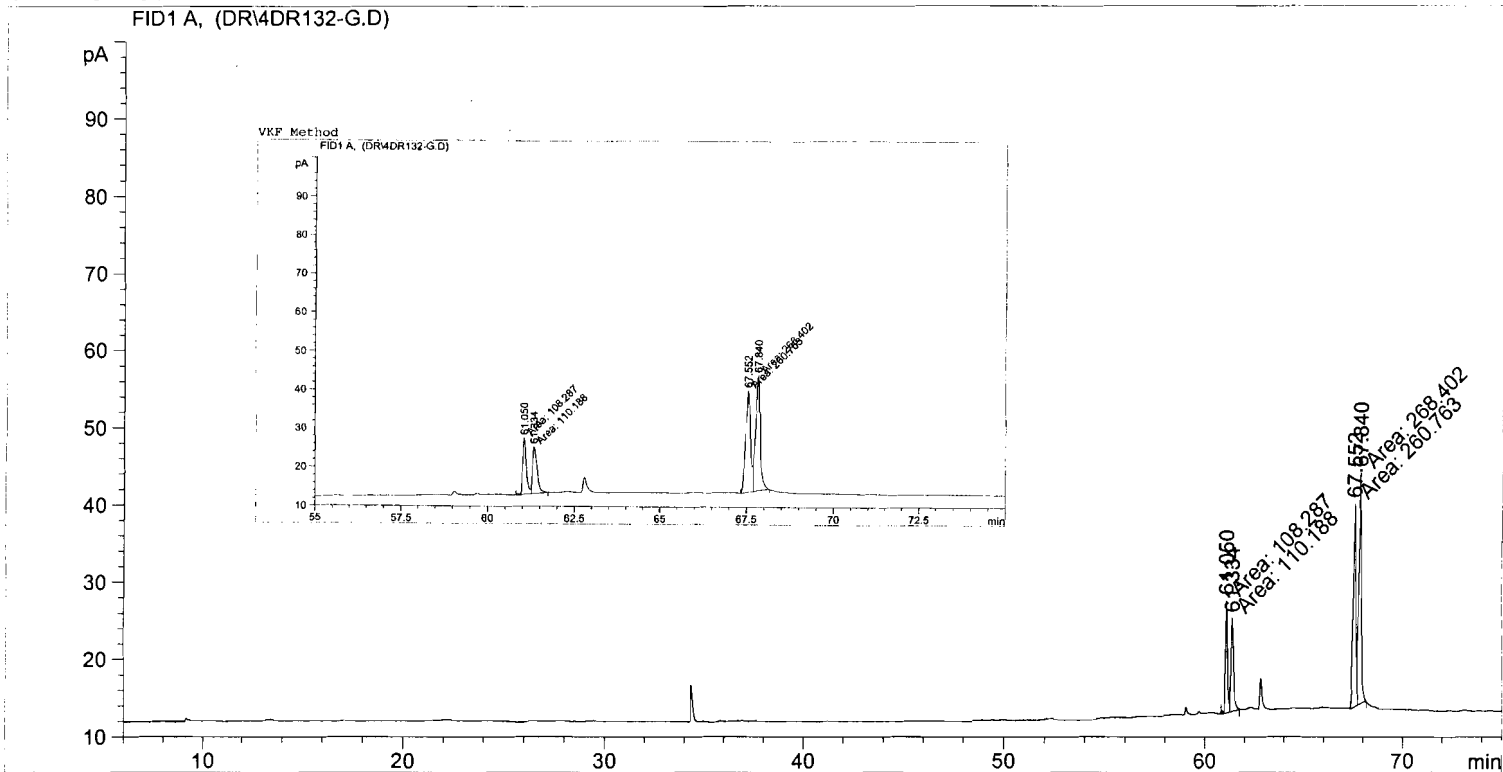

```

=====
Area Percent Report
=====

```

```

Sorted By      : Signal
Multiplier     : 1.0000
Dilution       : 1.0000
Sample Amount  : 2.00000 [ng/ul] (not used in calc.)
Use Multiplier & Dilution Factor with ISTDs

```

Signal 1: FID1 A,

| Peak # | RetTime [min] | Type | Width [min] | Area [pA*s] | Height [pA] | Area %   |
|--------|---------------|------|-------------|-------------|-------------|----------|
| 1      | 61.050        | MF   | 0.1239      | 108.28665   | 14.56791    | 14.48379 |
| 2      | 61.334        | FM   | 0.1515      | 110.18818   | 12.12047    | 14.73813 |
| 3      | 67.552        | MF   | 0.1654      | 260.76282   | 26.28061    | 34.87812 |
| 4      | 67.840        | FM   | 0.1500      | 268.40247   | 29.82926    | 35.89996 |

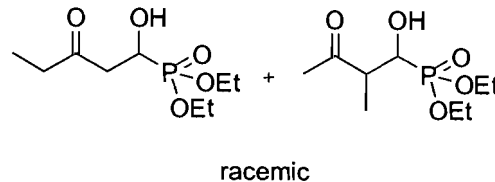

```
Totals :                747.64011    82.79825
```

```
Results obtained with standard integrator!
```

## DIETHYL ALPHAHYDROXYKETOPHOSPHONATE(butanone)

=====  
Injection Date : 3/31/2006 5:28:52 PM  
Sample Name : IV-DR-134-D Location : Vial 1  
Acq. Operator : dodda Inj : 1  
Acq. Instrument : Instrument 1 Inj Volume : Manually  
Acq. Method : C:\HPCHEM\1\METHODS\28-11-05.M  
Last changed : 3/31/2006 5:22:03 PM by dodda  
(modified after loading)  
Analysis Method : C:\HPCHEM\1\METHODS\28-11-05.M  
Last changed : 4/3/2006 11:16:08 AM by dodda  
(modified after loading)

## VKF Method

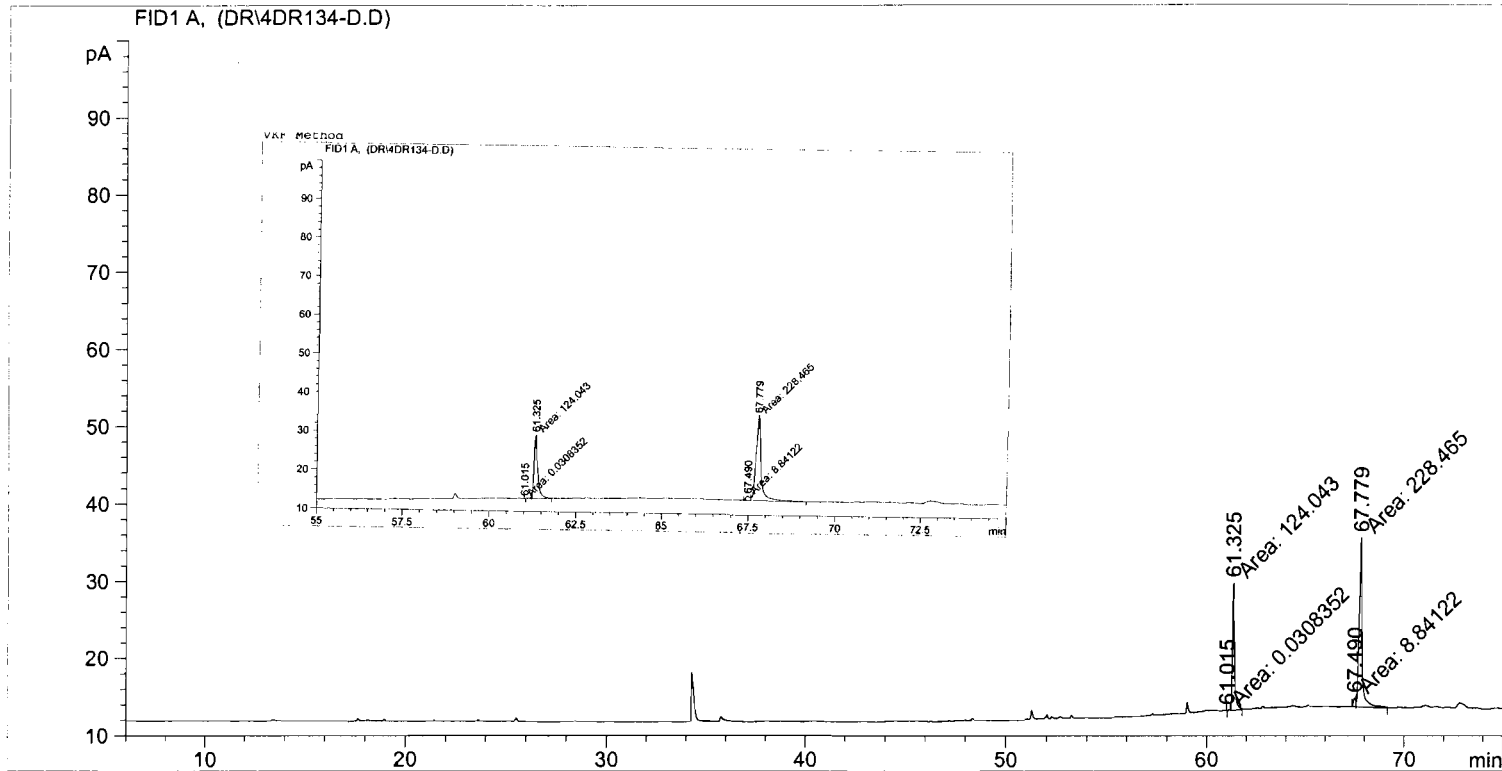

=====  
Area Percent Report  
=====

Sorted By : Signal  
Multiplier : 1.0000  
Dilution : 1.0000  
Sample Amount : 2.00000 [ng/ul] (not used in calc.)  
Use Multiplier & Dilution Factor with ISTDs

Signal 1: FID1 A,

| Peak # | RetTime [min] | Type | Width [min] | Area [pA*s] | Height [pA] | Area %   |
|--------|---------------|------|-------------|-------------|-------------|----------|
| 1      | 61.015        | MM   | 0.0383      | 3.08352e-2  | 1.34014e-2  | 0.00853  |
| 2      | 61.325        | MM   | 0.1256      | 124.04306   | 16.45497    | 34.32481 |
| 3      | 67.490        | MF   | 0.1375      | 8.84122     | 1.07175     | 2.44651  |
| 4      | 67.779        | FM   | 0.1744      | 228.46507   | 21.82769    | 63.22014 |

Totals : 361.38019 39.36782

Results obtained with standard integrator!

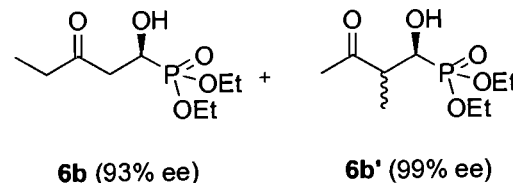

```

=====
Injection Date   : 4/4/2006 1:50:36 PM
Sample Name     : IV-DR-138-D
Acq. Operator  : dodda
Acq. Instrument : Instrument 1
Acq. Method    : C:\HPCHEM\1\METHODS\28-11-05.M
Last changed   : 4/4/2006 10:33:24 AM by dodda
                (modified after loading)
Analysis Method : C:\HPCHEM\1\METHODS\28-11-05.M
Last changed   : 9/6/2006 5:51:54 PM by dodda
                (modified after loading)
  
```

VKF Method

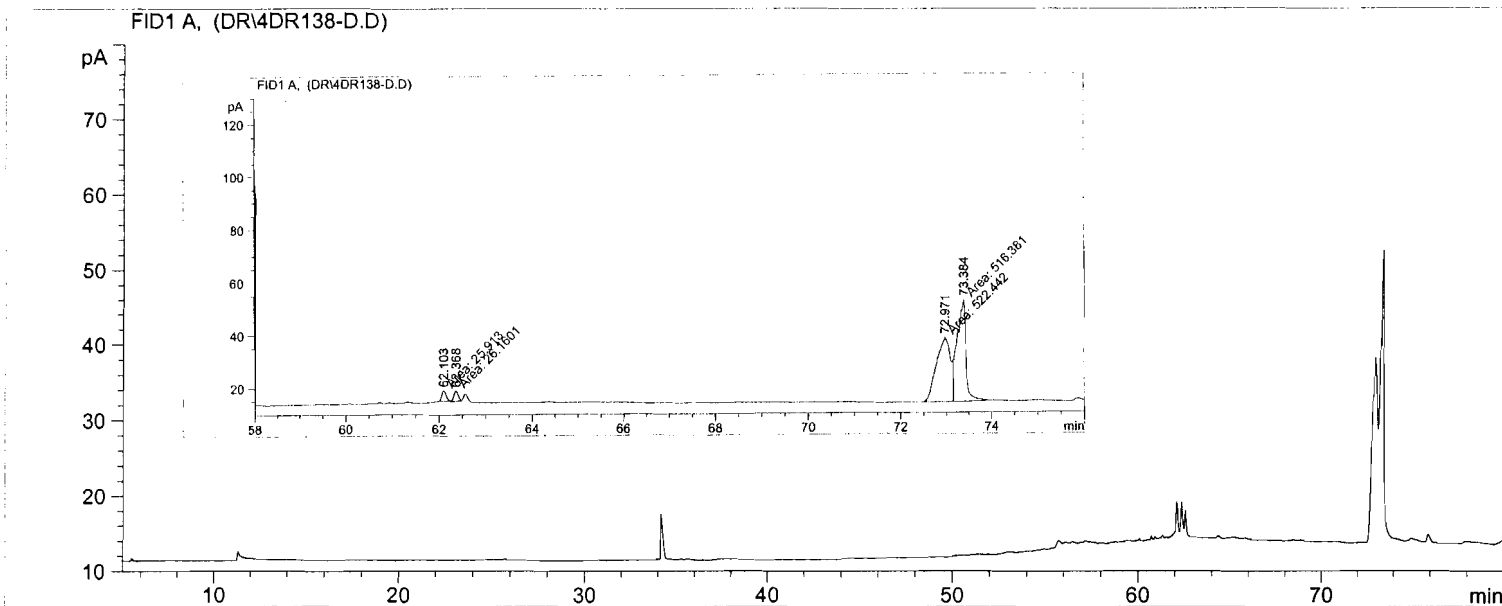

Area Percent Report

```

Sorted By      : Signal
Multiplier    : 1.0000
Dilution      : 1.0000
Sample Amount  : 2.00000 [ng/ul] (not used in calc.)
Use Multiplier & Dilution Factor with ISTDs
  
```

Signal 1: FID1 A,

| Peak # | RetTime [min] | Type | Width [min] | Area [pA*s] | Height [pA] | Area %   |
|--------|---------------|------|-------------|-------------|-------------|----------|
| 1      | 62.103        | MM   | 0.1060      | 25.91303    | 4.07581     | 2.37539  |
| 2      | 62.368        | MM   | 0.1064      | 26.16009    | 4.09629     | 2.39804  |
| 3      | 72.971        | MF   | 0.3568      | 522.44153   | 24.40538    | 47.89105 |
| 4      | 73.384        | FM   | 0.2232      | 516.38135   | 38.56390    | 47.33552 |

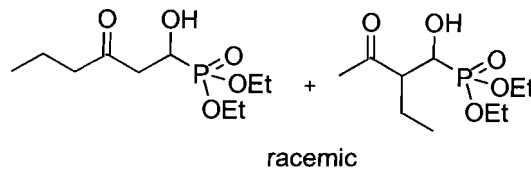

Totals : 1090.89600 71.14138

Results obtained with standard integrator!

Summed Peaks Report

Signal 1: FID1 A,

DIETHYL ALPHAHYDROXYKETOPHOSPHONATE (2-PENTANONE)

```

=====
Injection Date   : 4/5/2006 9:26:03 AM
Sample Name     : IV-DR-141-B
Acq. Operator  : dodda
Acq. Instrument : Instrument 1
Acq. Method    : C:\HPCHEM\1\METHODS\28-11-05.M
Last changed   : 4/5/2006 8:47:50 AM by dodda
                (modified after loading)
Analysis Method : C:\HPCHEM\1\METHODS\28-11-05.M
Last changed   : 5/13/2006 10:26:31 PM by dodda
                (modified after loading)
    
```

VKF Method

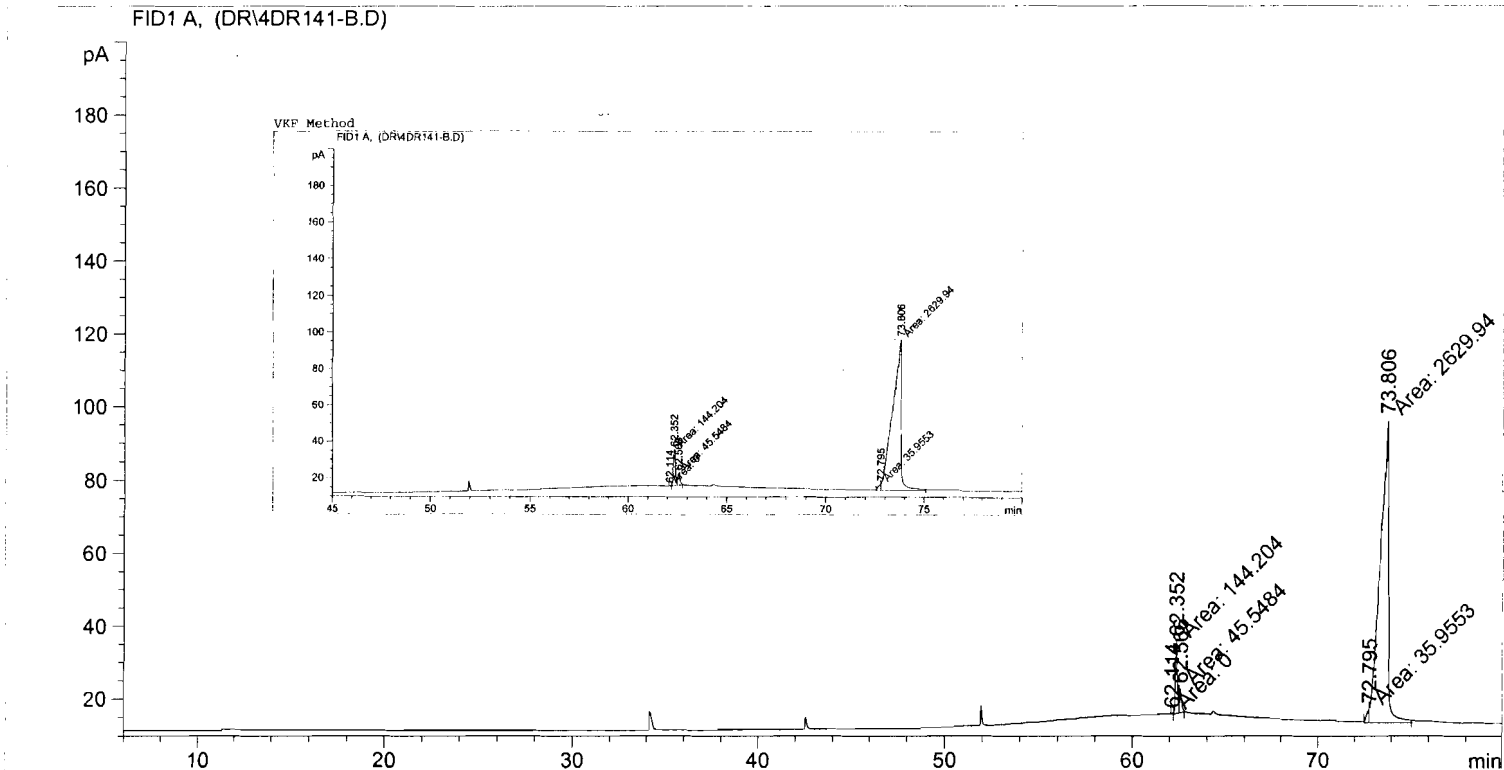

Area Percent Report

```

=====
Sorted By      : Signal
Multiplier    : 1.0000
Dilution      : 1.0000
Sample Amount : 2.00000 [ng/ul] (not used in calc.)
Use Multiplier & Dilution Factor with ISTDs
    
```

Signal 1: FID1 A,

| Peak # | RetTime [min] | Type | Width [min] | Area [pA*s] | Height [pA] | Area %   |
|--------|---------------|------|-------------|-------------|-------------|----------|
| 1      | 62.114        | MM   | 0.0000      | 0.00000     | 7.91976e-2  | 0.00000  |
| 2      | 62.352        | MF   | 0.1231      | 144.20358   | 19.52109    | 5.04978  |
| 3      | 62.566        | FM   | 0.1182      | 45.54842    | 6.42212     | 1.59503  |
| 4      | 72.795        | MF   | 0.1624      | 35.95532    | 3.68982     | 1.25910  |
| 5      | 73.806        | FM   | 0.5286      | 2629.93604  | 82.92406    | 92.09610 |

Totals : 2855.64336 112.63629

Results obtained with standard integrator!

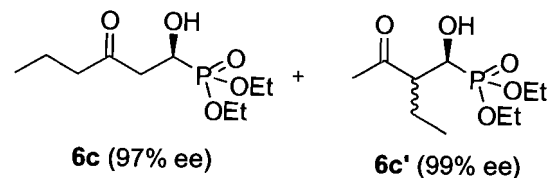

## DIETHYL ALPHAHYDROXYKETOPHOSPHONATE

```

=====
Injection Date   : 5/31/2006 5:59:04 PM
Sample Name     : V-DR-73-b
Acq. Operator   : dodda
Acq. Instrument : Instrument 1
Acq. Method     : C:\HPCHEM\1\METHODS\28-11-05.M
Last changed    : 5/31/2006 5:58:07 PM by dodda
                  (modified after loading)
Analysis Method : C:\HPCHEM\1\METHODS\28-11-05.M
Last changed    : 6/1/2006 10:40:14 AM by dodda
                  (modified after loading)
  
```

## VKF Method

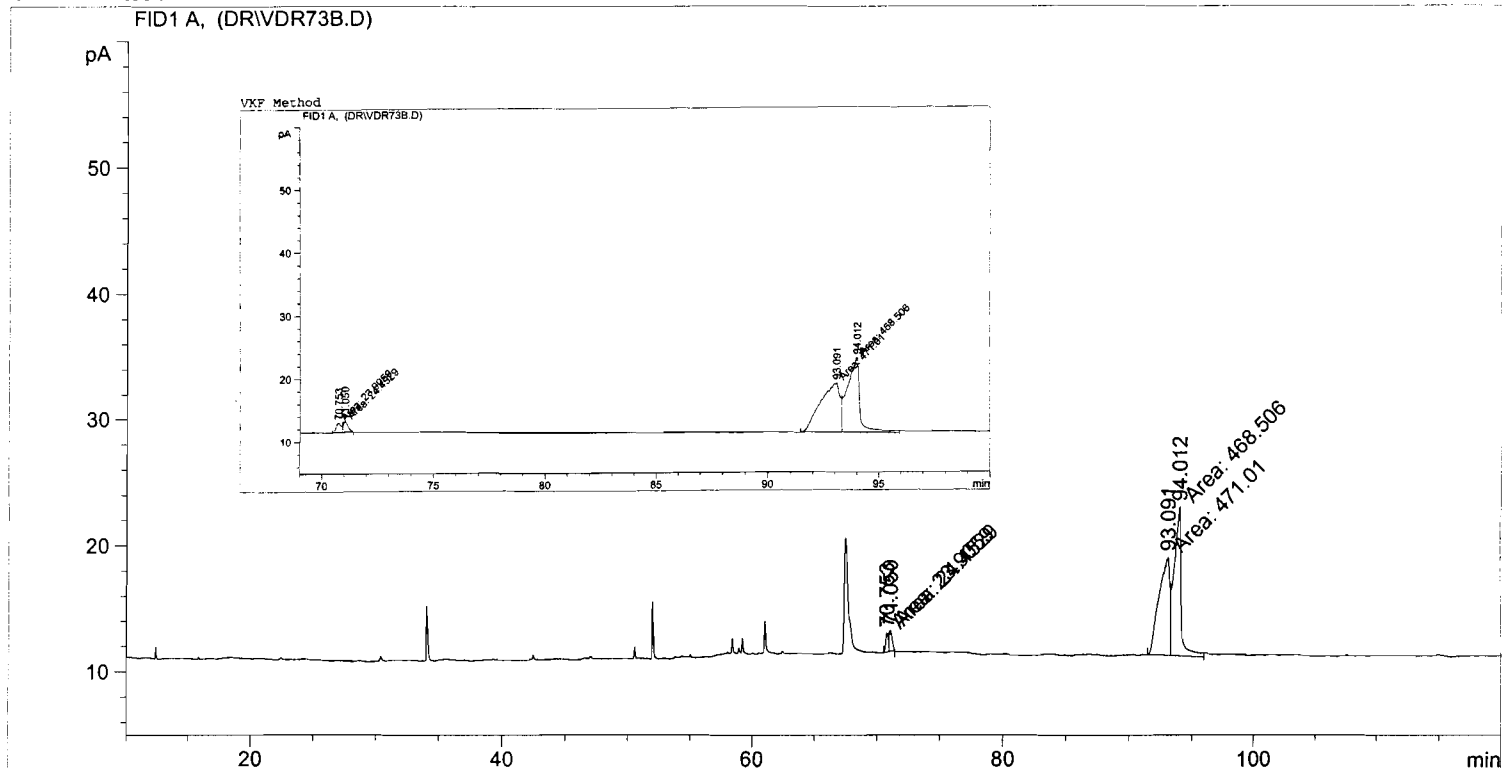

```

=====
                          Area Percent Report
=====
  
```

```

Sorted By      :      Signal
Multiplier     :      1.0000
Dilution       :      1.0000
Sample Amount  :      2.00000 [ng/ul]   (not used in calc.)
Use Multiplier & Dilution Factor with ISTDs
  
```

Signal 1: FID1 A,

| Peak # | RetTime [min] | Type | Width [min] | Area [pA*s] | Height [pA] | Area %   |
|--------|---------------|------|-------------|-------------|-------------|----------|
| 1      | 70.753        | MF   | 0.2608      | 23.90595    | 1.52766     | 2.41994  |
| 2      | 71.050        | FM   | 0.2406      | 24.45295    | 1.69411     | 2.47531  |
| 3      | 93.091        | MF   | 1.0078      | 471.01038   | 7.78916     | 47.67915 |
| 4      | 94.012        | FM   | 0.6618      | 468.50565   | 11.79805    | 47.42560 |

```
Totals :                      987.87492    22.80898
```

Results obtained with standard integrator!

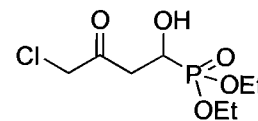

racemic



## DIETHYL ALPHAHYDROXYKETOPHOSPHONATE

```

=====
Injection Date   : 6/1/2006 1:29:56 PM
Sample Name     : V-DR-74-B                Location  : Vial 1
Acq. Operator   : dodda                   Inj       : 1
Acq. Instrument : Instrument 1             Inj Volume: Manually
Acq. Method     : C:\HPCHEM\1\METHODS\28-11-05.M
Last changed    : 6/1/2006 1:20:54 PM by dodda
                  (modified after loading)
Analysis Method : C:\HPCHEM\1\METHODS\28-11-05.M
Last changed    : 6/5/2006 9:38:01 AM by dodda
                  (modified after loading)

```

## VKF Method

FID1 A, (DR\VDR74B.D)

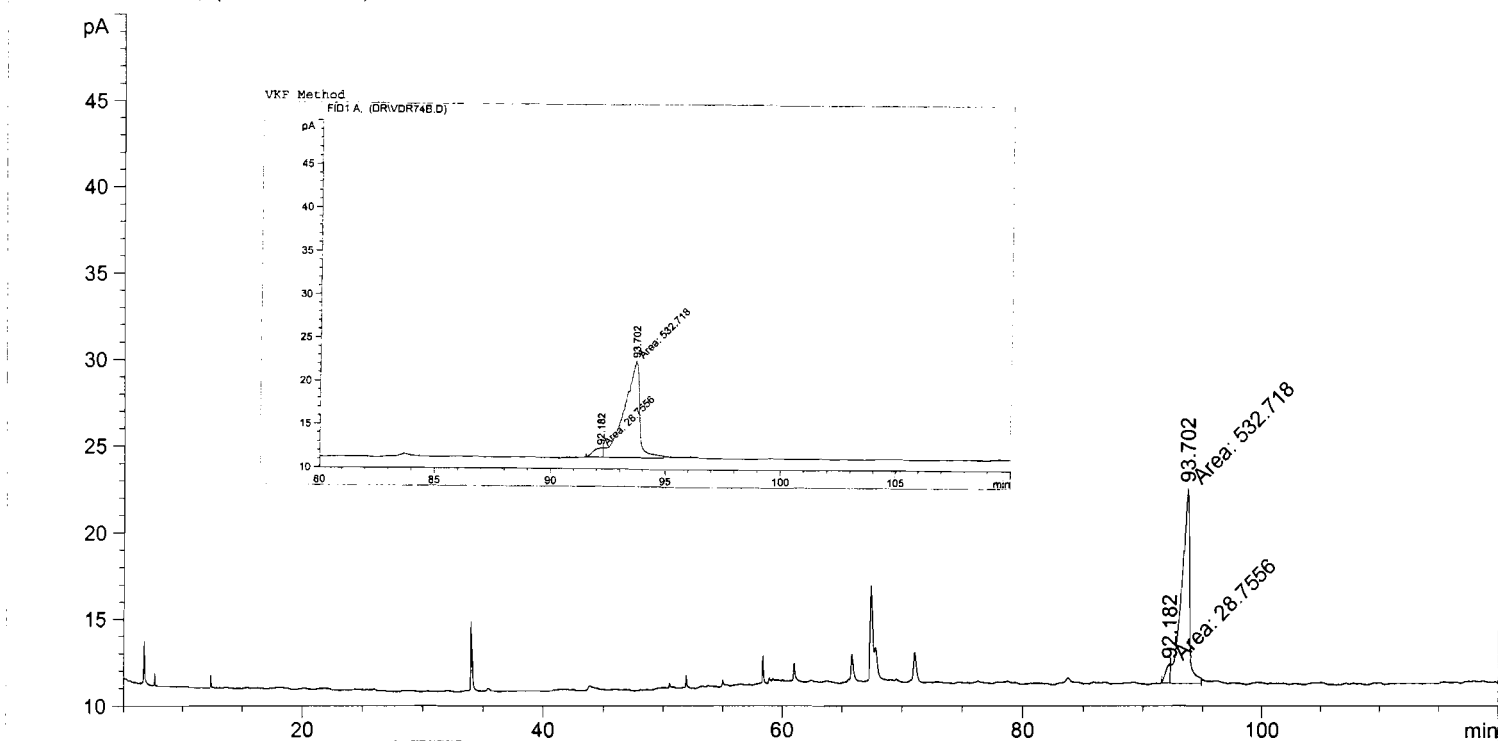

```

=====
Area Percent Report
=====

```

```

Sorted By      : Signal
Multiplier     : 1.0000
Dilution       : 1.0000
Sample Amount  : 2.00000 [ng/ul] (not used in calc.)
Use Multiplier & Dilution Factor with ISTDs

```

Signal 1: FID1 A,

| Peak # | RetTime [min] | Type | Width [min] | Area [pA*s] | Height [pA] | Area %   |
|--------|---------------|------|-------------|-------------|-------------|----------|
| 1      | 92.182        | MF   | 0.4497      | 28.75555    | 1.06568     | 5.12144  |
| 2      | 93.702        | FM   | 0.7911      | 532.71796   | 11.22378    | 94.87856 |

```
Totals :                561.47351  12.28946
```

Results obtained with standard integrator!

```

=====
Summed Peaks Report
=====

```

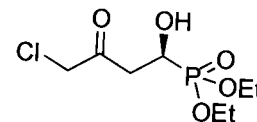

6d (90% ee)

**Area % Report**

Method Name: C:\EZStart\Projects\Default\Methods\AS.met  
 Data: C:\EZStart\Projects\Default\Data\V-DR-53-K  
 User: System  
 Acquired: 5/23/2006 12:38:31 PM  
 Printed: 6/15/2006 9:43:45 AM

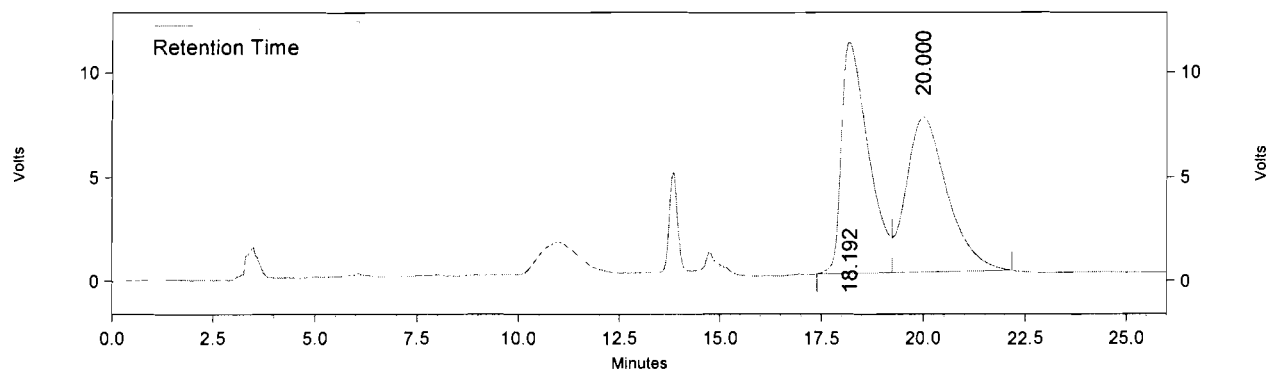

SPD-10A Vvp  
 Ch1-271nm  
 Results

| Retention Time | Area    | Area % | Height | Height % |
|----------------|---------|--------|--------|----------|
| 18.192         | 510847  | 49.70  | 11073  | 59.83    |
| 20.000         | 517050  | 50.30  | 7434   | 40.17    |
| Totals         | 1027897 | 100.00 | 18507  | 100.00   |

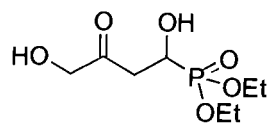

racemic

## Area % Report

Method Name: C:\EZStart\Projects\Default\Methods\AS.met  
 Data: C:\EZStart\Projects\Default\Data\V-DR-59-F  
 User: System  
 Acquired: 5/25/2006 4:03:51 PM  
 Printed: 5/25/2006 4:43:05 PM

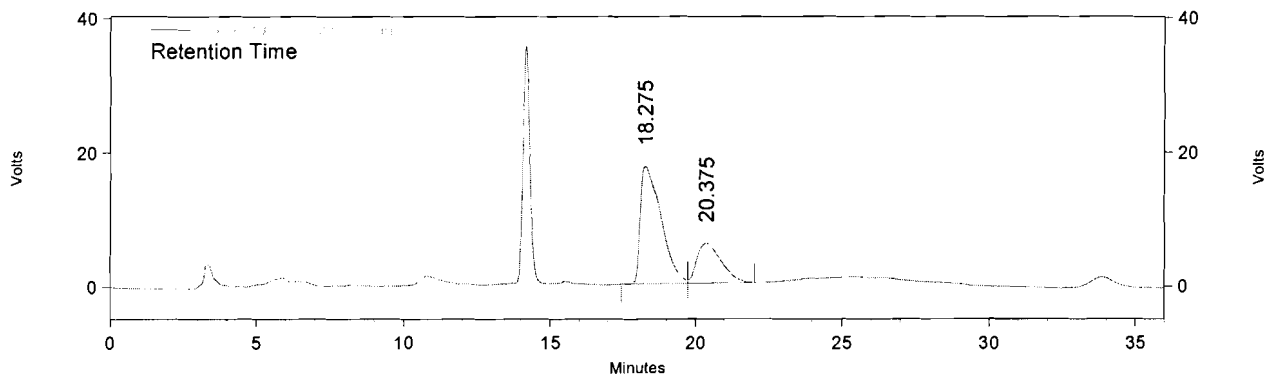

SPD-10AVvp  
 Ch1-271nm  
 Results

| Retention Time | Area    | Area % | Height | Height % |
|----------------|---------|--------|--------|----------|
| 18.275         | 865342  | 71.70  | 17473  | 74.67    |
| 20.375         | 341631  | 28.30  | 5926   | 25.33    |
| Totals         | 1206973 | 100.00 | 23399  | 100.00   |

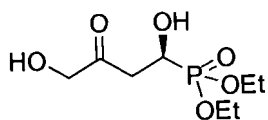

**6e** (43% ee)

## Area % Report

Method Name: C:\EZStart\Projects\Default\Methods\AS.met  
 Data: C:\EZStart\Projects\Default\Data\V-DR-54-A  
 User: System  
 Acquired: 5/25/2006 9:00:03 AM  
 Printed: 6/15/2006 9:43:17 AM

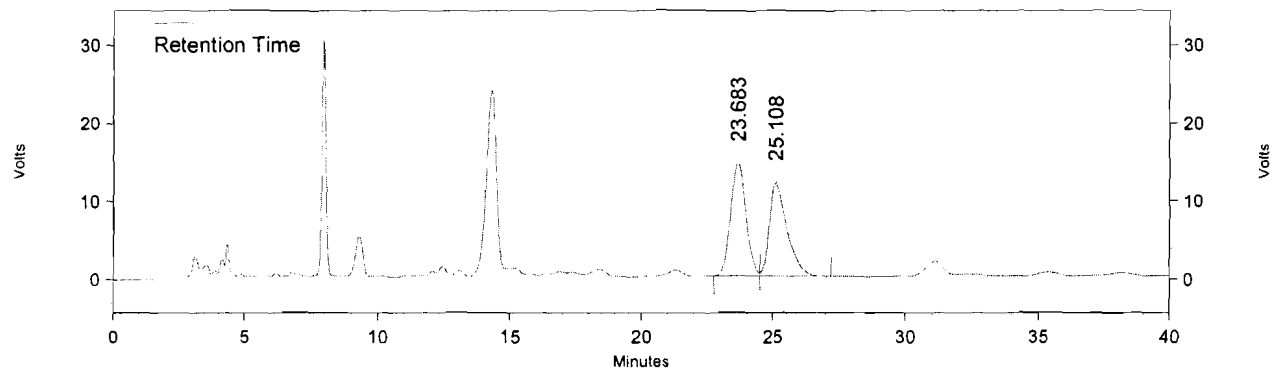

SPD-10AVvp  
 Ch1-278nm  
 Results

| Retention Time | Area    | Area % | Height | Height % |
|----------------|---------|--------|--------|----------|
| 23.683         | 578924  | 50.84  | 14441  | 54.56    |
| 25.108         | 559883  | 49.16  | 12025  | 45.44    |
| Totals         | 1138807 | 100.00 | 26466  | 100.00   |

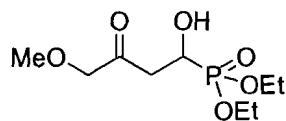

racemic

## Area % Report

**Method Name:** C:\EZStart\Projects\Default\Methods\AS.met  
**Data:** C:\EZStart\Projects\Default\Data\V-DR-62-F  
**User:** System  
**Acquired:** 5/26/2006 9:57:59 PM  
**Printed:** 5/26/2006 10:41:56 PM

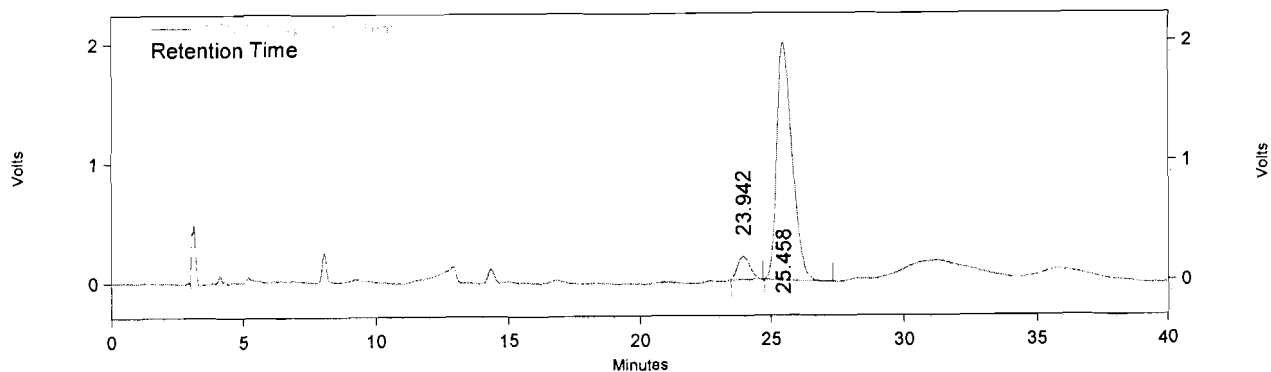

**SPD-10AVvp**  
**Ch1-278nm**  
**Results**

| Retention Time | Area  | Area % | Height | Height % |
|----------------|-------|--------|--------|----------|
| 23.942         | 6412  | 7.41   | 194    | 8.91     |
| 25.458         | 80151 | 92.59  | 1984   | 91.09    |

|        |       |        |      |        |
|--------|-------|--------|------|--------|
| Totals | 86563 | 100.00 | 2178 | 100.00 |
|--------|-------|--------|------|--------|

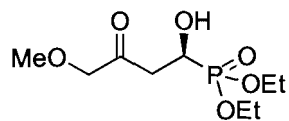

**6f (85% ee)**

## Area % Report

Method Name: C:\EZStart\Projects\Default\Methods\AS.met  
Data: C:\EZStart\Projects\Default\Data\V-DR-32-A  
User: System  
Acquired: 5/5/2006 5:15:27 PM  
Printed: 6/15/2006 9:42:55 AM

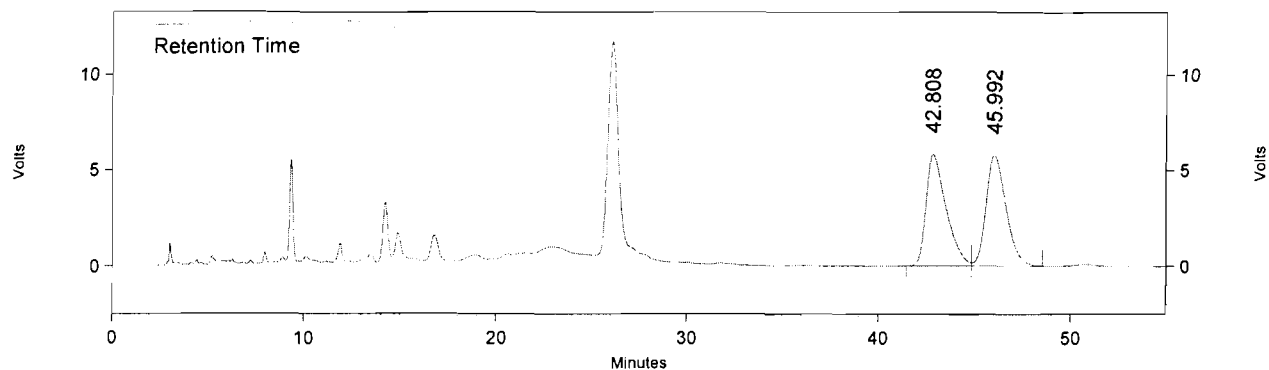

SPD-10AVvp  
Ch1-271nm  
Results

| Retention Time | Area   | Area % | Height | Height % |
|----------------|--------|--------|--------|----------|
| 42.808         | 418244 | 50.01  | 5830   | 50.22    |
| 45.992         | 418136 | 49.99  | 5780   | 49.78    |
| Totals         | 836380 | 100.00 | 11610  | 100.00   |

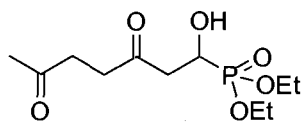

racemic

## Area % Report

Method Name: C:\EZStart\Projects\Default\Methods\AS.met  
 Data: C:\EZStart\Projects\Default\Data\V-DR-31-D  
 User: System  
 Acquired: 5/5/2006 7:33:22 PM  
 Printed: 6/15/2006 9:42:29 AM

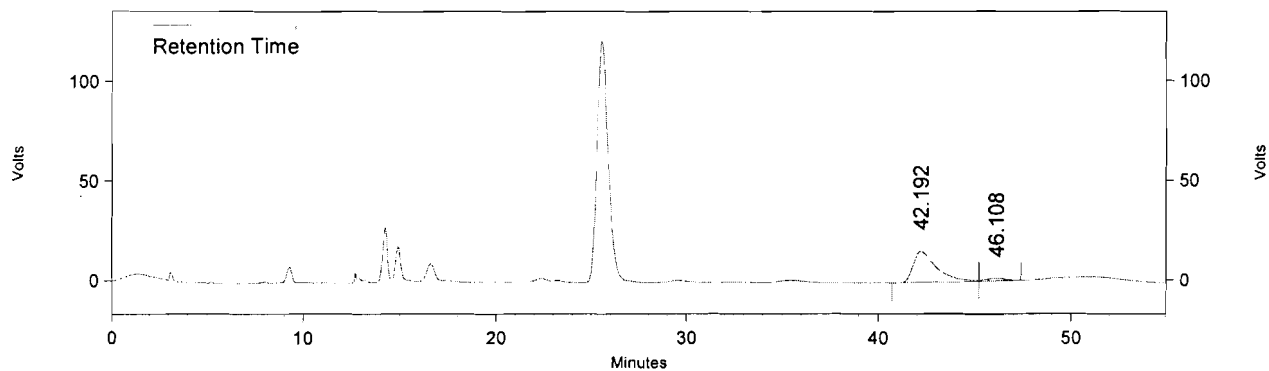

SPD-10AVvp  
 Ch1-276nm  
 Results

| Retention Time | Area           | Area %        | Height       | Height %      |
|----------------|----------------|---------------|--------------|---------------|
| 42.192         | 1300373        | 92.95         | 15641        | 92.05         |
| 46.108         | 98573          | 7.05          | 1350         | 7.95          |
| <b>Totals</b>  | <b>1398946</b> | <b>100.00</b> | <b>16991</b> | <b>100.00</b> |

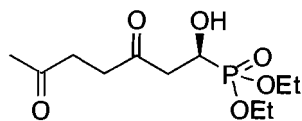

**6g (86% ee)**

**Area % Report**

**Method Name:** C:\EZStart\Projects\Default\Methods\AS.met  
**Data:** C:\EZStart\Projects\Default\Data\V-DR-26  
**User:** System  
**Acquired:** 5/2/2006 6:16:48 PM  
**Printed:** 6/15/2006 9:41:51 AM

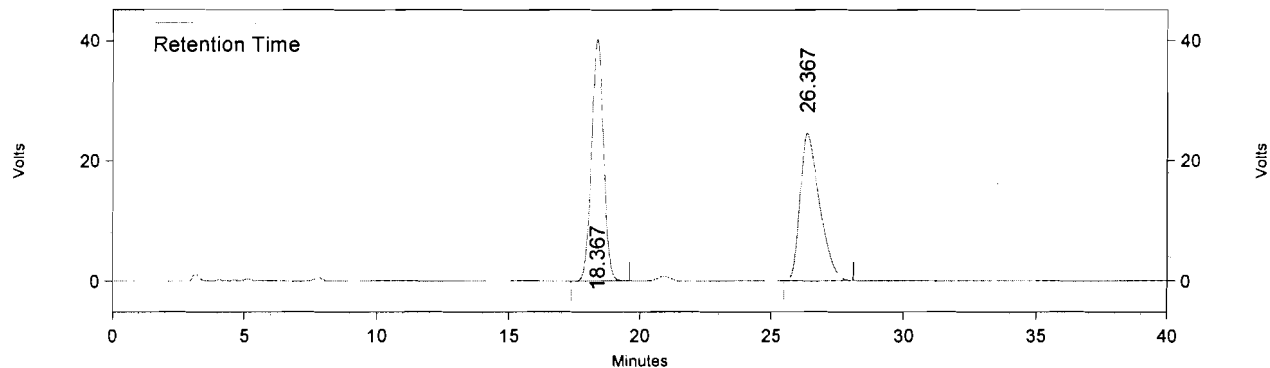

**SPD-10AVvp**  
**Ch1-292nm**  
**Results**

| Retention Time | Area           | Area %        | Height       | Height %      |
|----------------|----------------|---------------|--------------|---------------|
| 18.367         | 1277041        | 50.53         | 40121        | 62.13         |
| 26.367         | 1250334        | 49.47         | 24460        | 37.87         |
| <b>Totals</b>  | <b>2527375</b> | <b>100.00</b> | <b>64581</b> | <b>100.00</b> |

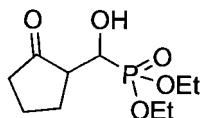

racemic (syn)



## Area % Report

Method Name: C:\EZStart\Projects\Default\Methods\AS.met  
 Data: C:\EZStart\Projects\Default\Data\V-DR-27A  
 User: System  
 Acquired: 5/2/2006 5:33:33 PM  
 Printed: 6/15/2006 9:40:47 AM

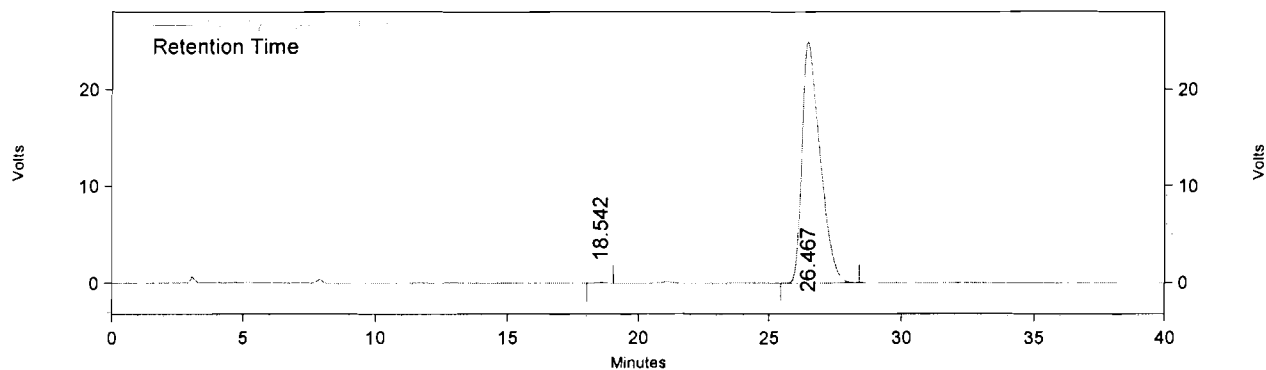

SPD-10AVvp  
 Ch1-292nm  
 Results

| Retention Time | Area    | Area % | Height | Height % |
|----------------|---------|--------|--------|----------|
| 18.542         | 1933    | 0.16   | 79     | 0.32     |
| 26.467         | 1184478 | 99.84  | 24969  | 99.68    |
| Totals         | 1186411 | 100.00 | 25048  | 100.00   |

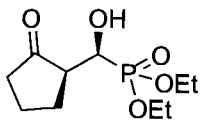

**6h** (> 99% ee)

**Area % Report**

Method Name: C:\EZStart\Projects\Default\Methods\AS.met  
 Data: C:\EZStart\Projects\Default\Data\V-DR-21(CYCLOHEXANONE-PHOSPHONATE)  
 User: System  
 Acquired: 4/28/2006 4:15:32 PM  
 Printed: 5/16/2006 9:43:54 PM

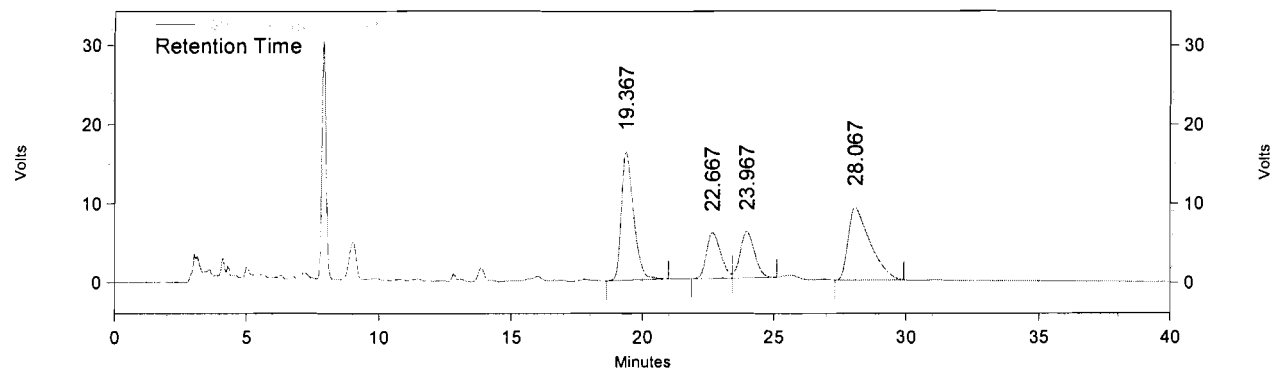

SPD-10AVvp  
 Ch1-280nm  
 Results

| Retention Time | Area    | Area % | Height | Height % |
|----------------|---------|--------|--------|----------|
| 19.367         | 524830  | 35.14  | 16255  | 43.62    |
| 22.667         | 222025  | 14.86  | 5873   | 15.76    |
| 23.967         | 222963  | 14.93  | 5914   | 15.87    |
| 28.067         | 523821  | 35.07  | 9221   | 24.75    |
| Totals         | 1493639 | 100.00 | 37263  | 100.00   |

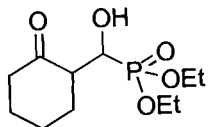

racemic

## Area % Report

Method Name: C:\EZStart\Projects\Default\Methods\AS.met  
 Data: C:\EZStart\Projects\Default\Data\V-DR-46C  
 User: System  
 Acquired: 5/17/2006 11:09:02 AM  
 Printed: 6/15/2006 9:40:18 AM

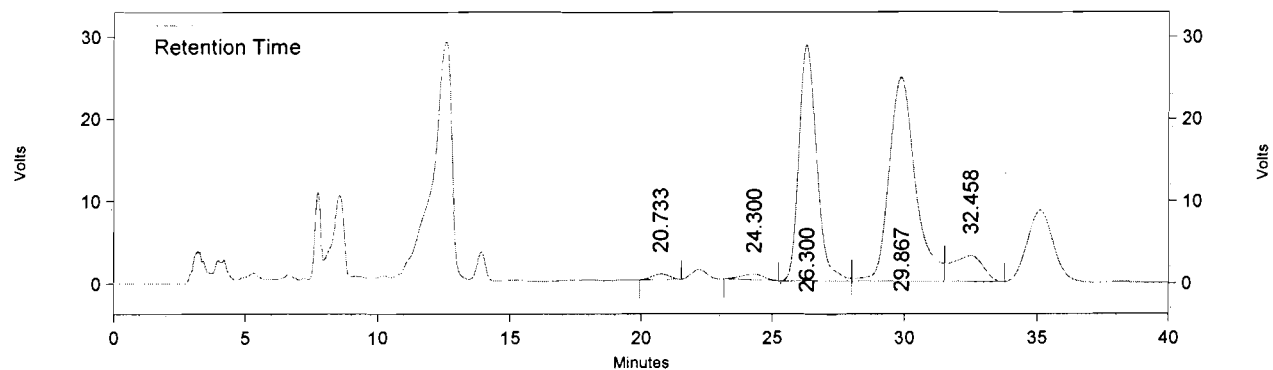

SPD-10AVvp  
 Ch1-277nm  
 Results

| Retention Time | Area    | Area % | Height | Height % |
|----------------|---------|--------|--------|----------|
| 20.733         | 30368   | 0.90   | 663    | 1.14     |
| 24.300         | 40892   | 1.22   | 677    | 1.17     |
| 26.300         | 1337537 | 39.76  | 28685  | 49.54    |
| 29.867         | 1700270 | 50.54  | 24789  | 42.81    |
| 32.458         | 254990  | 7.58   | 3094   | 5.34     |
| Totals         | 3364057 | 100.00 | 57908  | 100.00   |

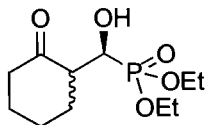

**6i**  
 (*anti* 96 % ee; *syn* 95 % ee)

# Area % Report

Method Name: C:\EZStart\Projects\Default\Methods\AS.met  
Data: C:\EZStart\Projects\Default\Data\V-DR-39C  
User: System  
Acquired: 5/11/2006 8:30:58 PM  
Printed: 5/16/2006 8:54:19 PM

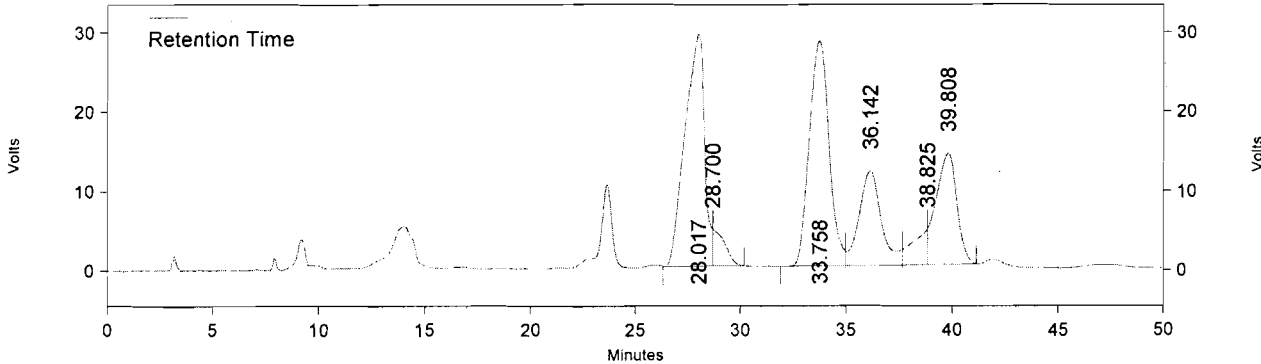

SPD-10AVvp  
Ch1-275nm  
Results

| Retention Time | Area    | Area % | Height | Height % |
|----------------|---------|--------|--------|----------|
| 28.017         | 1888189 | 31.65  | 29199  | 31.51    |
| 28.700         | 180522  | 3.03   | 4613   | 4.98     |
| 33.758         | 1846321 | 30.95  | 28362  | 30.60    |
| 36.142         | 876489  | 14.69  | 11952  | 12.90    |
| 38.825         | 218872  | 3.67   | 4542   | 4.90     |
| 39.808         | 955850  | 16.02  | 14008  | 15.12    |

|        |         |        |       |        |
|--------|---------|--------|-------|--------|
| Totals | 5966243 | 100.00 | 92676 | 100.00 |
|--------|---------|--------|-------|--------|

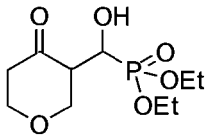

racemic

## Area % Report

Method Name: C:\EZStart\Projects\Default\Methods\AS.met  
 Data: C:\EZStart\Projects\Default\Data\V-DR-45-A  
 User: System  
 Acquired: 5/16/2006 8:00:55 PM  
 Printed: 5/16/2006 8:52:15 PM

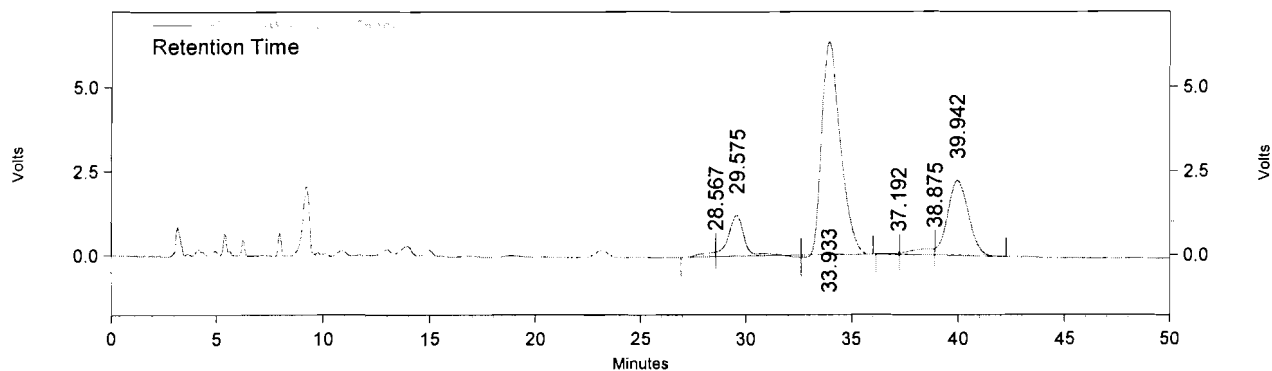

SPD-10AVvp  
 Ch1-276nm  
 Results

| Retention Time | Area   | Area % | Height | Height % |
|----------------|--------|--------|--------|----------|
| 28.567         | 6289   | 1.02   | 140    | 1.38     |
| 29.575         | 61415  | 9.94   | 1218   | 12.01    |
| 33.933         | 384552 | 62.21  | 6340   | 62.50    |
| 37.192         | 798    | 0.13   | 30     | 0.30     |
| 38.875         | 12273  | 1.99   | 184    | 1.81     |
| 39.942         | 152809 | 24.72  | 2232   | 22.00    |

| Totals | Area   | Area % | Height | Height % |
|--------|--------|--------|--------|----------|
|        | 618136 | 100.00 | 10144  | 100.00   |

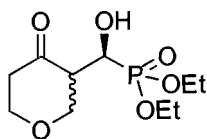

**6j**  
 (*anti* 97 % ee; *syn* 99 % ee)

## Area % Report

Method Name: C:\EZStart\Projects\Default\Methods\AS.met  
 Data: C:\EZStart\Projects\Default\Data\V-DR-40C  
 User: System  
 Acquired: 5/13/2006 10:19:40 PM  
 Printed: 5/15/2006 11:16:51 PM

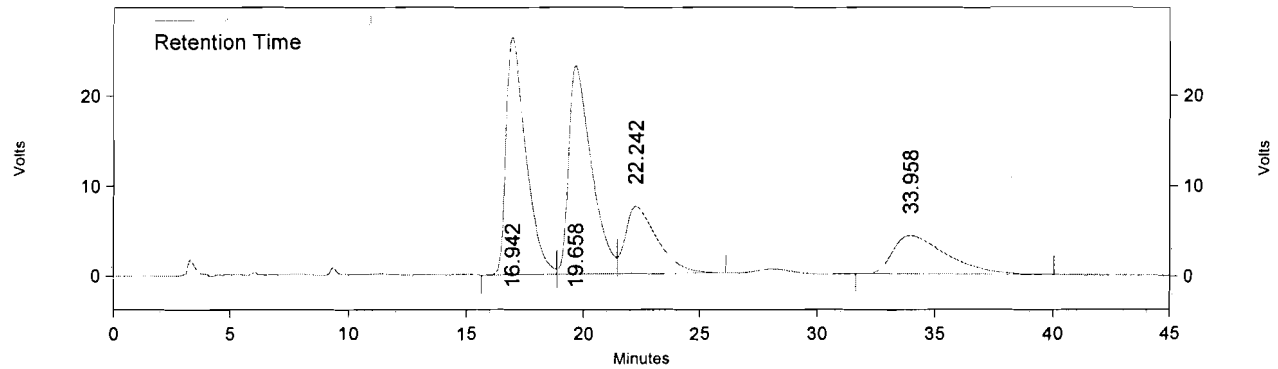

SPD-10AVvp  
 Ch1-256nm  
 Results

| Retention Time | Area    | Area % | Height | Height % |
|----------------|---------|--------|--------|----------|
| 16.942         | 1543746 | 34.46  | 26298  | 43.05    |
| 19.658         | 1565690 | 34.95  | 23118  | 37.84    |
| 22.242         | 707536  | 15.79  | 7475   | 12.24    |
| 33.958         | 662581  | 14.79  | 4203   | 6.88     |
| Totals         | 4479553 | 100.00 | 61094  | 100.00   |

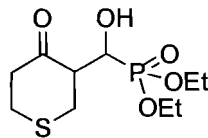

racemic

## Area % Report

Method Name: C:\EZStart\Projects\Default\Methods\AS.met  
 Data: C:\EZStart\Projects\Default\Data\V-DR-44-B  
 User: System  
 Acquired: 5/15/2006 10:27:39 PM  
 Printed: 5/15/2006 11:13:00 PM

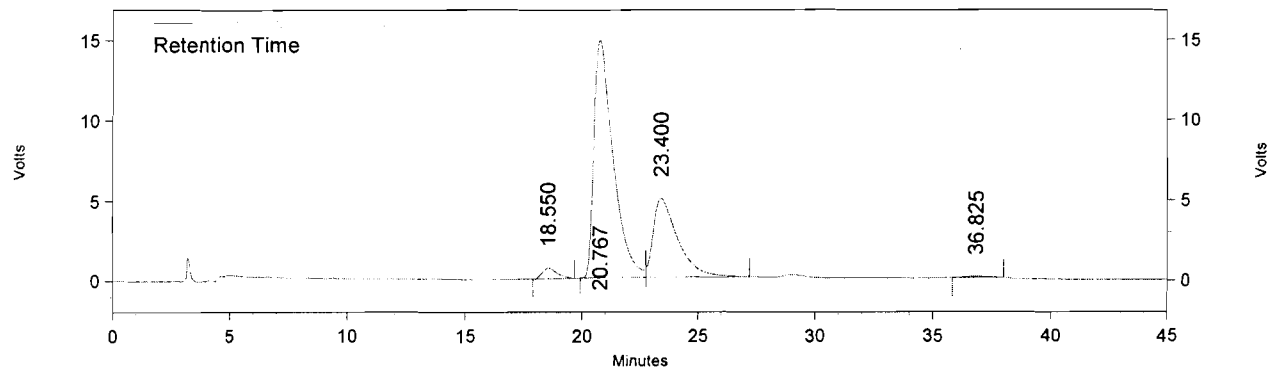

SPD-10AVvp  
 Ch1-254nm  
 Results

| Retention Time | Area    | Area % | Height | Height % |
|----------------|---------|--------|--------|----------|
| 18.550         | 29215   | 2.33   | 658    | 3.20     |
| 20.767         | 852525  | 68.12  | 14856  | 72.25    |
| 23.400         | 363565  | 29.05  | 4962   | 24.13    |
| 36.825         | 6185    | 0.49   | 87     | 0.42     |
| Totals         | 1251490 | 100.00 | 20563  | 100.00   |

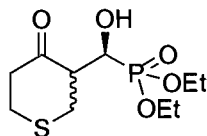

**6k**  
 (*anti* 93 % ee; *syn* 97 % ee)

## DIETHYL ALPHAHYDROXYKETOPHOSPHONATE

```

=====
Injection Date   : 5/25/2006 8:39:00 AM
Sample Name     : V-DR-49-D
Acq. Operator   : dodda
Acq. Instrument : Instrument 1
Acq. Method     : C:\HPCHEM\1\METHODS\28-11-05.M
Last changed    : 5/25/2006 8:33:16 AM by dodda
                  (modified after loading)
Analysis Method : C:\HPCHEM\1\METHODS\28-11-05.M
Last changed    : 9/6/2006 4:10:54 PM by dodda
                  (modified after loading)
  
```

## VKF Method

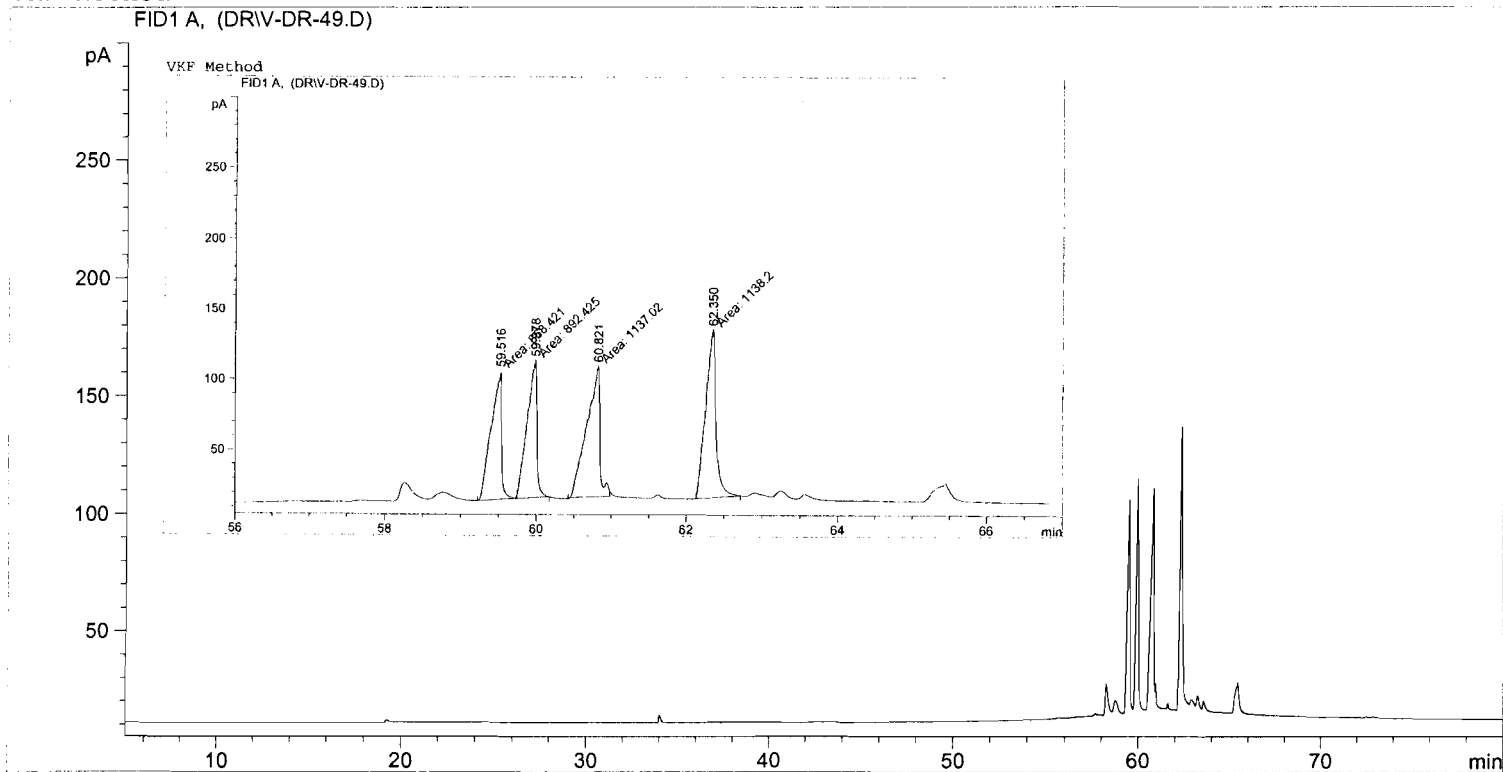

```

=====
                          Area Percent Report
=====
  
```

```

Sorted By      : Signal
Multiplier    : 1.0000
Dilution      : 1.0000
Sample Amount  : 2.00000 [ng/ul] (not used in calc.)
Use Multiplier & Dilution Factor with ISTDs
  
```

Signal 1: FID1 A,

| Peak # | RetTime [min] | Type | Width [min] | Area [pA*s] | Height [pA] | Area %   |
|--------|---------------|------|-------------|-------------|-------------|----------|
| 1      | 59.516        | MF   | 0.1588      | 868.42090   | 91.14473    | 21.51653 |
| 2      | 59.978        | FM   | 0.1530      | 892.42474   | 97.23463    | 22.11126 |
| 3      | 60.821        | MM   | 0.2042      | 1137.01575  | 92.78307    | 28.17140 |
| 4      | 62.350        | MM   | 0.1594      | 1138.20337  | 119.00426   | 28.20082 |

Totals : 4036.06476 400.16670

Results obtained with standard integrator!

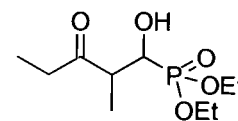

racemic



```

=====
Injection Date : 5/19/2006 5:59:25 PM
Sample Name    : V-DR-51-B                Location  : Vial 1
Acq. Operator  : dodda                    Inj       : 1
Acq. Instrument: Instrument 1              Inj Volume: Manually
Acq. Method    : C:\HPCHEM\1\METHODS\28-11-05.M
Last changed   : 5/18/2006 9:51:19 PM by dodda
Analysis Method: C:\HPCHEM\1\METHODS\28-11-05.M
Last changed   : 9/6/2006 5:14:11 PM by dodda
                (modified after loading)
    
```

VKF Method

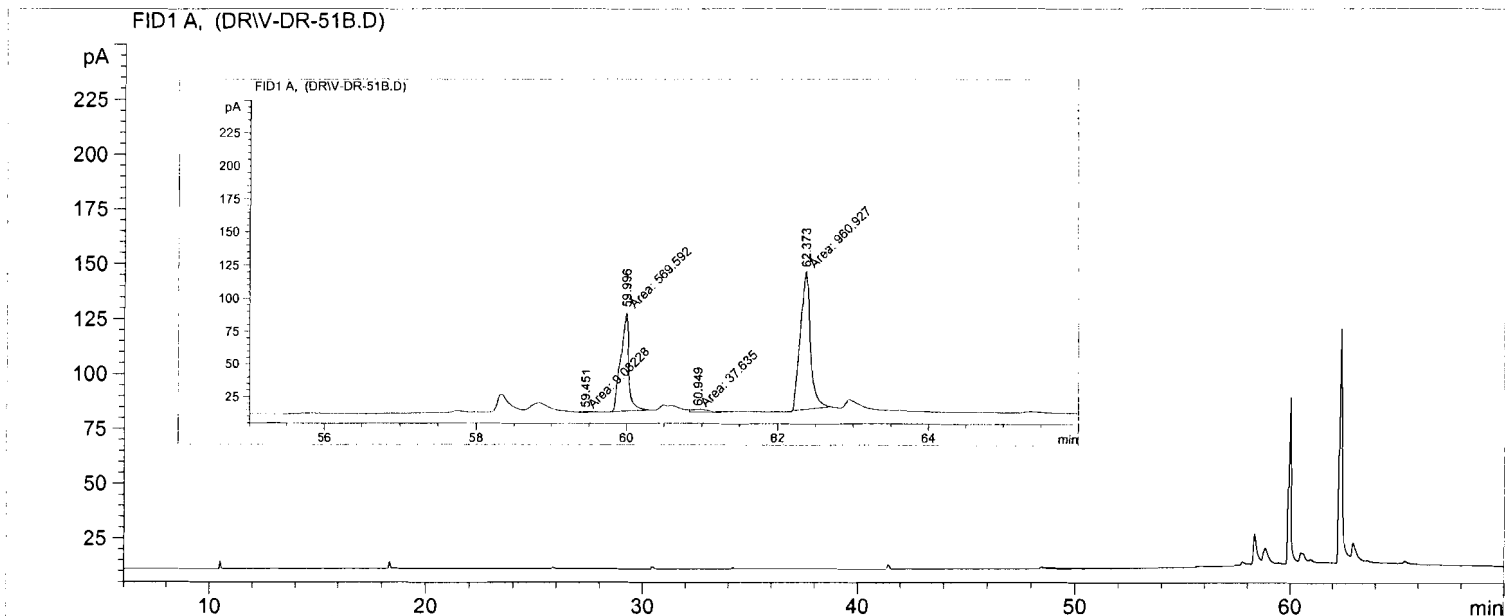

Area Percent Report

```

Sorted By      : Signal
Multiplier     : 1.0000
Dilution       : 1.0000
Sample Amount  : 2.00000 [ng/ul] (not used in calc.)
Use Multiplier & Dilution Factor with ISTDs
    
```

Signal 1: FID1 A,

| Peak # | RetTime [min] | Type | Width [min] | Area [pA*s] | Height [pA] | Area %   |
|--------|---------------|------|-------------|-------------|-------------|----------|
| 1      | 59.451        | MM   | 0.1561      | 9.08228     | 9.69993e-1  | 0.57584  |
| 2      | 59.996        | MM   | 0.1246      | 569.59198   | 76.19481    | 36.11330 |
| 3      | 60.949        | MM   | 0.2809      | 37.63504    | 2.23303     | 2.38614  |
| 4      | 62.373        | MM   | 0.1524      | 960.92694   | 105.06031   | 60.92473 |

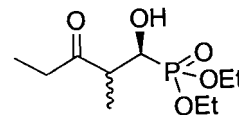

**61**  
(anti 92% ee; syn 97% ee)

Totals : 1577.23624 184.45814

Results obtained with standard integrator!

Summed Peaks Report

Signal 1: FID1 A,

=====  
Injection Date : 6/5/2006 8:11:49 PM  
Sample Name : V-DR-76-F Location : Vial 1  
Acq. Operator : dodda Inj : 1  
Acq. Instrument : Instrument 1 Inj Volume : Manually  
Acq. Method : C:\HPCHEM\1\METHODS\28-11-05.M  
Last changed : 6/5/2006 8:10:45 PM by dodda  
(modified after loading)  
Analysis Method : C:\HPCHEM\1\METHODS\28-11-05.M  
Last changed : 9/6/2006 5:18:00 PM by dodda  
(modified after loading)  
VKF Method  
=====

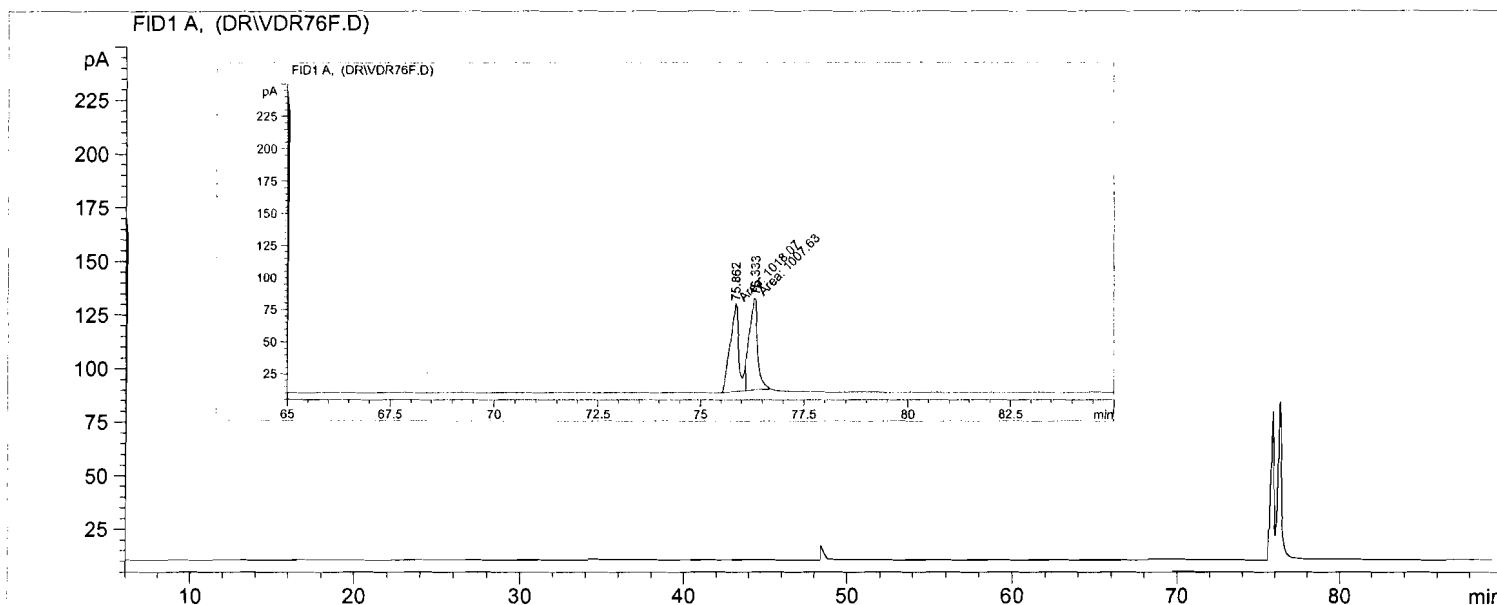

=====  
Area Percent Report  
=====

Sorted By : Signal  
Multiplier : 1.0000  
Dilution : 1.0000  
Sample Amount : 2.00000 [ng/ul] (not used in calc.)  
Use Multiplier & Dilution Factor with ISTDs

Signal 1: FID1 A,

| Peak # | RetTime [min] | Type | Width [min] | Area [pA*s] | Height [pA] | Area %   |
|--------|---------------|------|-------------|-------------|-------------|----------|
| 1      | 75.862        | MF   | 0.2502      | 1018.07349  | 67.81412    | 50.25768 |
| 2      | 76.333        | FM   | 0.2346      | 1007.63361  | 71.57278    | 49.74232 |

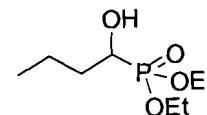

racemic

Totals : 2025.70709 139.38689

Results obtained with standard integrator!

=====  
Summed Peaks Report  
=====

Signal 1: FID1 A,

## DIETHYL ALPHAHYDROXYPHOSPHONATE

```

=====
Injection Date   : 6/5/2006 6:07:21 PM
Sample Name     : V-DR-79-A                Location  : Vial 1
Acq. Operator   : dodda                   Inj       : 1
Acq. Instrument : Instrument 1             Inj Volume: Manually
Acq. Method     : C:\HPCHEM\1\METHODS\28-11-05.M
Last changed    : 6/5/2006 6:07:51 PM by dodda
                  (modified after loading)
Analysis Method : C:\HPCHEM\1\METHODS\28-11-05.M
Last changed    : 6/5/2006 8:09:55 PM by dodda
                  (modified after loading)

```

## VKF Method

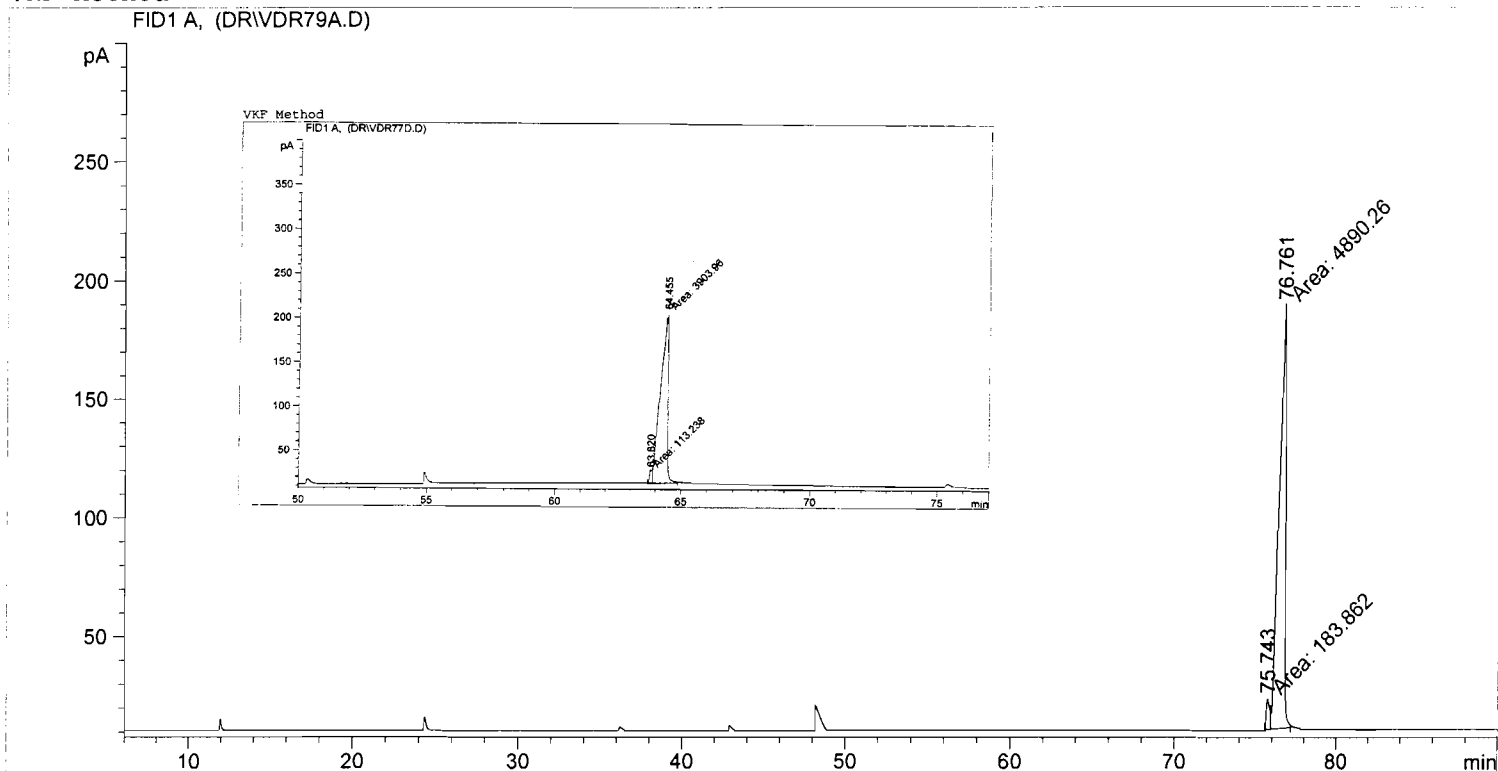

```

=====
                          Area Percent Report
=====

```

```

Sorted By      :      Signal
Multiplier     :      1.0000
Dilution      :      1.0000
Sample Amount  :      2.00000 [ng/ul]   (not used in calc.)
Use Multiplier & Dilution Factor with ISTDs

```

Signal 1: FID1 A,

| Peak # | RetTime [min] | Type | Width [min] | Area [pA*s] | Height [pA] | Area %   |
|--------|---------------|------|-------------|-------------|-------------|----------|
| 1      | 75.743        | MF   | 0.2451      | 183.86171   | 12.50261    | 3.62352  |
| 2      | 76.761        | FM   | 0.4599      | 4890.26318  | 177.23874   | 96.37648 |

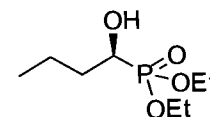

7 (93% ee)

```
Totals :                      5074.12489  189.74135
```

Results obtained with standard integrator!

```

=====
                          Summed Peaks Report
=====

```
